# Supplementary material for: Exploration of the Potential Transcriptional Regulatory Mechanisms of DNA Methyltransferases and MBD Genes in Petunia Anther Development and Multi-Stress Responses
Source: MDPI journal article supplement (doi:10.3390/genes13020314), 2022-02-08
Supplement: s1 [file s1]

**Table S6. Nomenclature and physicochemical properties of *PhMBD* genes.**

| <b>MBD<br/>number</b> | <b>Protein ID</b>        | <b>theoretical<br/>isoelectric<br/>points</b> | <b>Protein<br/>length (aa)</b> | <b>molecular<br/>weights</b> |
|-----------------------|--------------------------|-----------------------------------------------|--------------------------------|------------------------------|
| PhMBD4                | Peaxi162Scf00714g00124.1 | 8.71                                          | 1948                           | 213.81139                    |
| PhMBD7                | Peaxi162Scf00411g00117.1 | 9.92                                          | 220                            | 25.2789                      |
| PhMBD5                | Peaxi162Scf00224g00513.1 | 5.57                                          | 246                            | 27.54061                     |
| PhMBD1                | Peaxi162Scf01039g00228.1 | 8.54                                          | 167                            | 19.10753                     |
| PhMBD9                | Peaxi162Scf00332g00710.1 | 4.93                                          | 336                            | 37.58765                     |
| PhMBD2                | Peaxi162Scf00320g00413.1 | 6.02                                          | 323                            | 36.1113                      |
| PhMBD10               | Peaxi162Scf00313g00818.1 | 4.43                                          | 368                            | 39.98523                     |
| PhMBD3                | Peaxi162Scf00915g00037.1 | 5.94                                          | 542                            | 59.28419                     |
| PhMBD6                | Peaxi162Scf00954g00319.1 | 5.96                                          | 334                            | 37.39162                     |
| PhMBD8                | Peaxi162Scf00207g00645.1 | 4.63                                          | 312                            | 34.50802                     |
| PhMBD11               | Peaxi162Scf00392g00416.1 | 4.94                                          | 1190                           | 130.347                      |
