# Supplementary material for: Exploration of the Potential Transcriptional Regulatory Mechanisms of DNA Methyltransferases and MBD Genes in Petunia Anther Development and Multi-Stress Responses
Source: MDPI journal article supplement (doi:10.3390/genes13020314), 2022-02-08
Supplement: s1 [file s1]

**Table S5. Nomenclature and physicochemical properties of *PhC5-MTases*.**

| <b>PhC5-MTase<br/>number</b> | <b>Protein ID</b>         | <b>theoretical<br/>isoelectric<br/>points</b> | <b>Protein<br/>length (aa)</b> | <b>molecular<br/>weights</b> |
|------------------------------|---------------------------|-----------------------------------------------|--------------------------------|------------------------------|
| PhMET1                       | Peaxi162Scf01053g00039.1  | 5.88                                          | 1557                           | 174.83957                    |
| PhCMT2                       | Peaxi162Scf00045g00047.1  | 6.32                                          | 1022                           | 113.98887                    |
| PhCMT3                       | Peaxi162Scf00062g00201.1  | 5.26                                          | 892                            | 100.55967                    |
| PhCMT1                       | Peaxi162Scf00441g00015.1  | 5.08                                          | 786                            | 88.47439                     |
| PhDRM3                       | Peaxi162Scf00164g000518.1 | 5.75                                          | 662                            | 74.12327                     |
| PhDRM2                       | Peaxi162Scf00326g00710.1  | 4.8                                           | 604                            | 68.48901                     |
| PhDRM4                       | Peaxi162Scf00005g00086.1  | 4.96                                          | 602                            | 67.69436                     |
| PhDRM1                       | Peaxi162Scf00089g00638.1  | 5.32                                          | 553                            | 62.94315                     |
| PhDNMT2                      | Peaxi162Scf00341g00624.1  | 6.26                                          | 397                            | 45.2213                      |
