# Supplementary material for: Exploration of the Potential Transcriptional Regulatory Mechanisms of DNA Methyltransferases and MBD Genes in Petunia Anther Development and Multi-Stress Responses
Source: MDPI journal article supplement (doi:10.3390/genes13020314), 2022-02-08
Supplement: s1 [file s1]

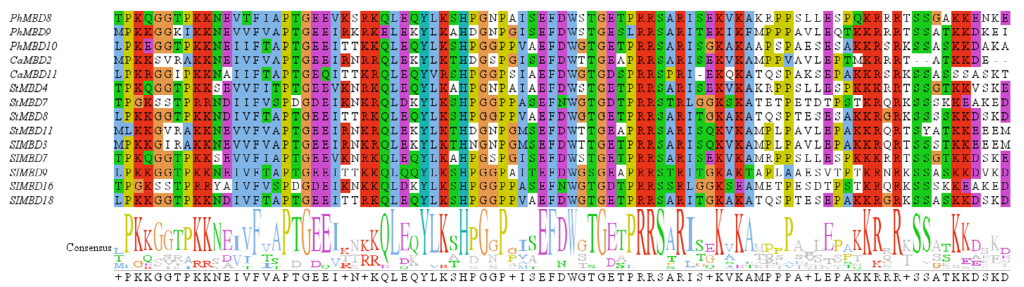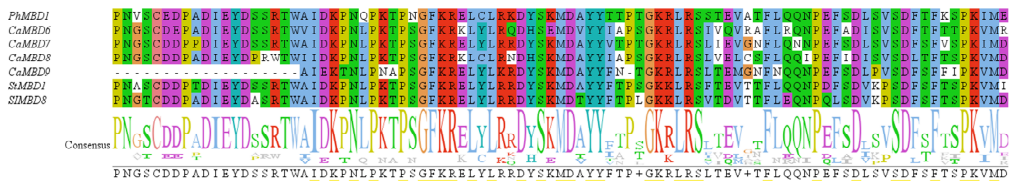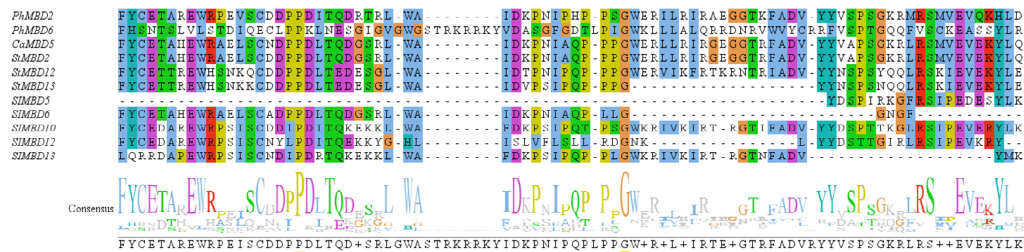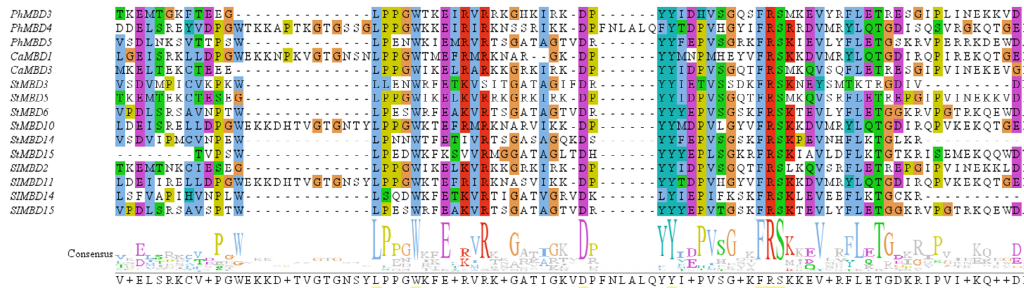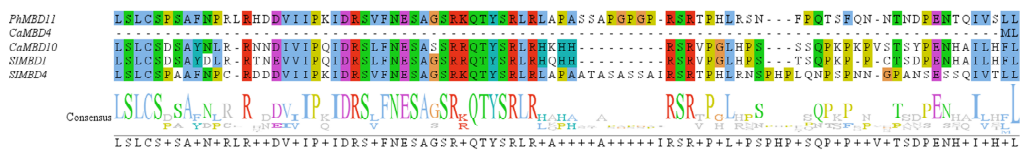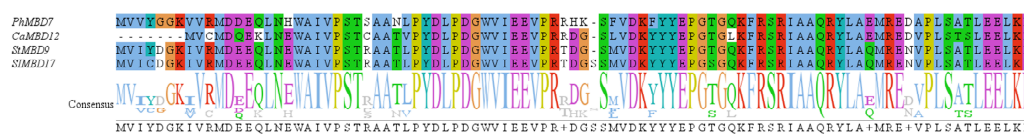

**Figure S2. Multiple-sequence alignments of MBD genes**  
The conserved MBD domains of *PhMBDs*, *CaMBDs*, *StC5-MTases* and *SlC5-MTases*.
