# Supplementary material for: Exploration of the Potential Transcriptional Regulatory Mechanisms of DNA Methyltransferases and MBD Genes in Petunia Anther Development and Multi-Stress Responses
Source: MDPI journal article supplement (doi:10.3390/genes13020314), 2022-02-08
Supplement: s1 [file s1]

**Table S3 Primers of *PhC5-MTase* and *PhMBD* genes used in the experiments.**

| Gene number              | Gene name      | Primer sequence(5'→3')   |                           |
|--------------------------|----------------|--------------------------|---------------------------|
|                          |                | Forward                  | Reverse                   |
| Peaxi162Scf00326g00710.1 | <i>PhDRM2</i>  | GGGCAGCAACAGGGTGAG       | CGAGGATAGTGATAAAACAAGGAAG |
| Peaxi162Scf00441g00015.1 | <i>PhCMT1</i>  | ATGCCGAGAAAACGAAAAGC     | TGTCGCTTTGATTTCCTAGTTGT   |
| Peaxi162Scf00164g00518.1 | <i>PhDRM3</i>  | TCCACCAGTGCCAGTTATTCA    | CAAGGATGCGTTCTATTTGTTCT   |
| Peaxi162Scf01053g00039.1 | <i>PhMET1</i>  | GAGGTGGTTGGTTGTCAGGTG    | TCCCCATCCCAGTTTATTTCTT    |
| Peaxi162Scf00062g00201.1 | <i>PhCMT3</i>  | TAGATTTGTATTCGGGATGTGGA  | GCAAAAGGGCTAAGGTCAACG     |
| Peaxi162Scf00045g00047.1 | <i>PhCMT2</i>  | TGTTTCCAAAGTCAATGTGGTAGA | CCAAGGCTCAACCCCGTA        |
| Peaxi162Scf01039g00228.1 | <i>PhMBD1</i>  | CACAATGTGGGAAGTGCTTCA    | GGGTTTTAGGTTGATTGGCTTA    |
| Peaxi162Scf00320g00413.1 | <i>PhMBD2</i>  | CCGAGCCACATGCTTTGA       | TCTGATTAGCTTGTTCCCTTGC    |
| Peaxi162Scf00915g00037.1 | <i>PhMBD3</i>  | ACCACTAAAGGAGCGAGAACTG   | GGCATACCCAGACAAGGACC      |
| Peaxi162Scf00313g00818.1 | <i>PhMBD10</i> | CTGAAGAACTGAACCAGCAAAG   | TCAGTTGCTTGGGCTTCCTC      |
