# Supplementary material for: Exploration of the Potential Transcriptional Regulatory Mechanisms of DNA Methyltransferases and MBD Genes in Petunia Anther Development and Multi-Stress Responses
Source: MDPI journal article supplement (doi:10.3390/genes13020314), 2022-02-08
Supplement: s1 [file s1]

**Table S8. Fifteen different motifs commonly observed in *PhMBD* genes.**

| <b>Motif</b> | <b>Best possible match</b>                     |
|--------------|------------------------------------------------|
| 1            | IKKBEVYYVAPTGKRFRSKKEVZKYLKEH                  |
| 2            | VGAFTVQCANCFKWRLIPTKEKYEEIRGHILEEPFYCETAREW    |
| 3            | CDDPPDITQDGSRLWAIDKPNIPQPPSGWERJLRI            |
| 4            | ISEFDWSTGETPRRSARISEKVKAKPPPAVLESPKKRRRTSSASKK |
| 5            | EEPLPPGWKKEJRPRKKG                             |
| 6            | DIWADPCFEFAFKTLTGEIPIEDDFCFQGIVQQEC            |
| 7            | FYSDPGKGLKFRSKRDVLRYL                          |
| 8            | YVRQGVQLNQFSFQIPRPLQEDYVKKR                    |
| 9            | LMMENGKINQPEPAHSPQQQ                           |
| 10           | MEGDQPGLVTPGKMDQNNNHG                          |
| 11           | NHGEDAQKQLVLYDPAVVG                            |
| 12           | CWVHEDSFADIWTDPCIEFA                           |
| 13           | RGLPYDVDIDPGFGSKFW                             |
| 14           | RNPSTPKIPMPPRFRRRWSGEEH                        |
| 15           | AFKGETGDFEENFGEVRH                             |
