# Supplementary material for: Exploration of the Potential Transcriptional Regulatory Mechanisms of DNA Methyltransferases and MBD Genes in Petunia Anther Development and Multi-Stress Responses
Source: MDPI journal article supplement (doi:10.3390/genes13020314), 2022-02-08
Supplement: s1 [file s1]

**Table S7. Fifteen different motifs commonly observed in *PhC5-MTase* genes.**

| Motif | Best possible match                                                                                       |
|-------|-----------------------------------------------------------------------------------------------------------|
| 1     | NRNSDSPLSDVKNEQJLVFLSIVDYLRPKYVLMENVVDFVRFNKGYLFRLLALASLLEMGYQVRFGIM<br>EAGAYGLPQFRKRVFIWAALPSEVLPEWPEPTH |
| 2     | VQMCFHPEQDRVLTVRECARLQGFPDSYKFSGTIKEKYRQVGNAVAVPVAFALGY                                                   |
| 3     | ISRTDRYKSLGNSFQVDTVAYHLSVLKDLFPNGINVLSLFSGIGGAEVALHRLGIRLKNVVSVEISEVNR<br>NILRSWWEQTNQTGELI               |
| 4     | YAIMEKTGEPDDCLSTCEAKELEFKLDGNKKSTLPLPGQVDVICGGPPCQGISG                                                    |
| 5     | TSVLYDHRPLQLNEDBYIRVCQIPKRP GABFRDLPGVIV                                                                  |
| 6     | ELALLDJYSGCGMSTGLCKGAVSSGVWLITKEEPDANAF AQNSLKLNH                                                         |
| 7     | YYENEAFKAKDGWFIYSVRLFYRPPDVTDEKYAAADIRKRGYIHNLPIDNPFALLPKKEVTI                                            |
| 8     | IYFVEYMFESSDHSKMLHGKLLQRGSETVLGTAANERELFTNECLTVQLKDIKGTVSLEIRSRPWGH<br>QYRKENIDADKLDRAAEERKAKDLPTEYYCK    |
| 9     | TDMAWYRLGKPSKQYAPWFEPVLKTVRVGISILTLLKRESRVAKLSYADVIKRLCGLEENDKAYISSK<br>LLDVERYVVVHGQIILQLFEEYPDEDIKRCPF  |
| 10    | GDDKEEEKGVRFQSFGRVENWNISGYEDGSPVIWISTALADYDCRKPSKKYKKJYDYFFEKACACVE<br>VYKSLSK                            |
| 11    | VHGKSKGPFGRLLWWDENVPTVVTDPZPH                                                                             |
| 12    | QVQKYVLDQCRKWNLVWVGRNKLAPLEPDEVEMJLGFPKNHTRG                                                              |
| 13    | HHTKWIIKKKKKILQKGENLNPRAGIAPVVSMMKAMQATTTRLVNRIWGEFYSIY                                                   |
| 14    | DLPCRTLHNWALYNSDSLISLELLPMKPCADIDVTIFGSGVVAEDDGS                                                          |
| 15    | SGJEILSSGYGGDFVISQSPCIYLQLANLDST                                                                          |
