# Supplementary material for: Exploration of the Potential Transcriptional Regulatory Mechanisms of DNA Methyltransferases and MBD Genes in Petunia Anther Development and Multi-Stress Responses
Source: MDPI journal article supplement (doi:10.3390/genes13020314), 2022-02-08
Supplement: s1 [file s1]

**Table S2. Sequences of MBD proteins in the 7 tested species.**

**>PhMBD1**

MVKDTPKTPKTFKPAANSSVSIWAAQCGNCFKWRMISTQEEFEEIRSRFIEEPFYCNNKPN  
VSCEDPADIEYDSSRTWAIDKPNQPKTPNGFKRELCLRKDYSKMDAYYTTPTGKRLRSSTE  
VATFLQQNPEFSDLVSDFTFKSPKIMEDTIPSSVLANSNKKSAK

**>PhMBD2**

MEGDHPDVTPTGKMDQNNNHGSDPANLNNVNTEPHALRVSSPDIMETPTQKPAEVTSPA  
REQANQISEDKENHNKNAQSQLVLYDPAVSGNIEPFRARRKSFPNSTSRVLPVGAFTVQC  
ANCFKWRLIPTKEKYEEIRGHILEHPFYCETAREWRPEVSCDDPPDITQDRTRLWAIDKPN  
PHPPSGWERILRIRAEAGGTFADVYYVSPSGKMRSMVEVQKHLDEHPEYVAQGVQLNQ  
FSFLSPRPLQEDYVKKRRPAPSRDVPDVTPISWVAPDGTSSQLLGAPGSPGSDTAPPDV  
PVEKSPKKPKLMDDNDSVAK

**>PhMBD3**

MNVCYSDPSKGLKFFSKADVLRYLSSVGSNCSGSSNTKEMKKKDTGKFSTEKTSEGLPPG  
WTKEIRVRRKGHKIRKDPYYIDHVSGQSFRSMKEVYRPLETRESGRFESKPGDQCPSTSEL  
GESISSITTDREASGKVVNSNQKLKLGAEHMHSSCLEGSVSSFEGGAVTENAREEDDGK  
VASVSVSGEHQEKVDDGKVSESARGELQEKEDDCKVGSDPVKGENQKGEDDCNIVSDR  
VSGEDQEKPSRDGVEKHDQKTIQRKRKKGMNLPRRMSKRLAGVKADTSLELQTNNQAY  
LATVRQEEETEAASTDNPVKFIKTSRHVATAVAGITISENVEAGSQTSKRQQDLVSLPLKER  
ELPSAEPAAKTGLASCEADKKGETALESSLDIWTDPCIEFAIKTLTGTIPLINEKKVDSTPGP  
CLGMPSVNTPPSVGLPSDDIWADPCFMFAVKTLTGEIPIGDDFCSQKIVQQECISSQFQGN  
GLALANMRFQEFQGSNLSQFGVPEKAMYKKQPAVAPNTYQNSWFTKFGSHQSSPLC

**>PhMBD4**

MLLSLVSLVDRNPTTPKIPSQLRFRRRWSSEIHRPIGLLRALKKISKQLTIYTHVETGKKFY  
KKEVSRYMNSKDTCLGVTQVDYQDNKCEDKVSEMNYQEKSFSDNNVSQVNDQDKSCF  
EDNVSQMNNQDKSSSGNNVSQIVEGTKISHEWLPPGWIVELRTRKSGSNAGMTYKYVIDP  
STGSKFYSKPEVSKYLKTMKQNNIAGEEQIHGTAEVSSSNQKASDNSKDIGNSRISKRRK  
SDTDQSSNGIEEGSKQKTSQDSEENGERSKSKRKKSGANRPSTKTFPAHGAGDDFSNEKA  
SQDSKENGPHSPLSKRKKPGTDSPSAKTLYTDPVHGYVFRSKKDVFRYLETGDTSRCARR  
SAKSNVASTPTTDDASLKKSECSVTGKQLFATDEPKAGKSLVTCSPAQVEKSKKQPECSVA  
DANTIITSILAEINENHFDENINEDAEIGLAGATESVGLKRLSPVSTPQSDLRPAKQLPENEQ  
EKRSCKAATEQSSKSRNTKSLKPGVRVSKRLAGHSPEVEADLDLGERALPAVVEKSASPSP  
PLDVGGQELLKQPVPKLETGDSAQASPSAAPSDDLPPGWKKEIKITKKASGIRKDPLYID  
PVHGYVFRSKKDVFRYLQTDGINSCTRPGKKDLDTTLKESSPTTLNTSSKNSGCSVTERQ  
PFASRGGKRSGTYSPVVQAKSSKKQPGSSASNPNTIITSSAADINAKHSYENGIENAEISLD  
TEPEIRDNTGDRKVIVSESVDVKRVSAVSARKSDVLTKEKLPENEQEKQTNEETVEQSKRS  
RKKKLLTPGHRTSKRLVGQNPEPVADLDIGERALRAVVKKSTSSGLPLKVNSQEIPAQNKY  
PTVGTGNSDQASLSRETSAEIPPGREKEILAQNKDPTVGTGNSDQAYLSRDAPVDKISSLS  
RDPPVGKISPRRKKKTPAQNKDPAVPAQNKYPTEGTGNSDQASLSRETSAEIPPGREKEIL  
ALNKDPTVGTGNSDQASLSRDAPVDKVSSLSRDPPVGKISPRRKKKTPAQNKDPAVPAQN

KYPTVGTGNSDQASLSRGTSVAEIPPGREKEILALNKDPTVGTGNSDQASLSRDAPVDKVS  
SLSRDPPVGKILPRRKRKTPAQNKDPAVGTGISDQASQSRVASEDELPPGWTKEILVRNGDP  
TVRTGNAGQASLSRELSDELPPGWTREMLVQNRDPTVRTGNAEQVLSREFSDELPPG  
WTREMLAHKKDPIVRTGNIEQASLSREYSDELPPGWTREMLAEKKDPIVRTGNIEQASL  
SREYSDELPPGWTREMLAQNKDSTRGNGNSHQASLSGEASVDELPPGWTKEMLAQNK  
APTKGTGSSGQASVDELPPGWKKEIRIRKNSSRIKKDPFNLALQFYTDPVHGYIFRSRRDV  
MRYLQTGDISSCAVRPTKRGPDSAVEDNSVSLHLSGSHHLRSRIKPTVATCLISPVSYLIAIQ  
LAYGGNCSITYSMAPQAESSNEQPGSSGFNLNTSISSIAAEITETRSCENVNKDTEVRLDIE  
AEIRDLFGEPKTIASEYVDVKRSSAVFPQSDILPEQKLPETEKEKHSNKGALAQSRKFRNK  
NSLAPVRRVSKKFSHHNPDVAANLDLGEHALRAVVKKTAPSGFPLNVSGQGFPQQIDLVT  
GSFDPAYLSKKASSQDDPLGEFTKCSKESQAFKEQKAAMELTSEKQDDEKRILQDSWPAEI  
LHGSRNVQLERQEVREWSAAELVKEEQGSQKRFLKDWQPEELAWESRRLPVEDQSASER  
STAPQVHKRRGNENMQWQDPQLAQPSQRRGELNVENQSVRGKQTGELVTENQDDQSRR  
LQTQLSSHPFGDYWSDPCLEFAFKTLTGAIPVEDTLPFQGSTQQEFGSYPQVYDGCDFLPV  
FNNYSFDMNEVPNPCPSEEHLPINQTLPTGNNSIPGSSSVSSQNPGLDTQAKDYQSNFKP  
RR

>PhMBD5

MAETAVSSNYPDSL NITGDFPDDCLPPDPLLQSGTYIIDGGDSNVNVDITPEKDLVDERHVS  
DLAPPAEKGESTAEMQTAVTETVTPQRRVNKSVETTAERPSWLPENWKIEMRVRTSGATA  
GTVDRYYFEPVSGRKFRSKIEVLYFLETGSKRKKGSTDSEATPSETPKSQKQKKGSKTKK  
ITSFYFDSRNPPQSVCWVHTDSFADTWTASCHGVMVPERRKDEWDAVFSSVSQLRQRKE  
CINF

>PhMBD6

MEQDQLGLATPGKTDHNNIHGSSVASHRDNTKHEPNNLRDPASSSVIGTPNQTPIDLTSSPE  
REDHSTEDEDNHGEDSQKQLVLYDPAAVGAGDIELLPDPVSSQPSRRNSFPNNTSRILPAVG  
AFTVQCANCFKWRLIPTKEKYEEIREHILEEPFYCETAREWRAGVSCDDPPDLTQDGSRLW  
AIDKPNIQPPAGWERLLRIRGEGGTRYVAPSGKRLRSMIEIQKYLQEHDPDYVRQGVSMS  
QFSFQIPRPLQENYVKKRPYR PALAHGENDPVHPIAWVGPADDTDLRLGMPGMSSPSDKA  
PLFEPVSQSLKKKRTPSKRMRNADAASN

>PhMBD7

MDKRNSSTMMIPMPPPTRRHRSGAEYSTNNRQLMVVPPPTSTAITPYTTTTSLSSFKLPPGW  
GVQEVPRPHGSRVDKYYYEPGTGLKFRSLREVERRLNGEIFASRSRSSLRKMVVYGGKV  
VRMDDEQLNHWAIVPSTSAANLPYDLPGWVIEEVPRRHKSFVDKFYYEPGTGQKFRSRI  
AAQRYLAEMREDAPLSATLEELKENKPLSKMFKLHHHVK

>PhMBD8

MASSNMEKATHDDEIVSFTPKQGGTPKKNEVTFIAPTGEEVKSRKQLEQYLKSHPGNPAIS  
EFDWSTGETPRRSARISEKV KAKRPPSLLESPQKRRRTSSGAKKENKETDAAKVEKETS DT  
KEVESAKEENENLEKKDGEAEKVDDADDGKLDKSEDAKTEEKQASGEKLEPQNDQESS  
AADVNENKPEGMTAEYAADEEFKDAHENKPEAVTGEHAVDEEFKDAQENKPEEDQAVD  
EEFKDAQENHPEAATAEHAVDEEFKDAHGDDGESSLGEKKEAEGTDMVMENNKINQPG

MAHSQQQHQSAPISC

>PhMBD9

MEKTEVLPLELPAPPSWKKLLMPKKGGKIKKNEVVFVAPTGEEIRKRKELEKYLKAHDG  
NPGISEFDWSTGESLRRSARITEKIKFMPPPAVLEQTKKRRRTSSATKKDKKEIDFDEGEKESL  
DKREMESGKEESESGKKENVGKNVMQDEGKDELGDQKEDTEHKKEMEVS DREVSGR  
MNEISDYTQVDAGKIAENGAHETMAIDTKVQNDSTFKDFNGLVADAELEKTNAAEAGA  
EVKEQQIDKGSSADVDNHDIPDNITPETIVAVEDINNIQEPAFIGETNDFHENLGEHRSLEEE  
KDKNSRASLMDNGKINQPEAHTPQHQSAAPISC

>PhMBD10

MASSEVVSIELPAPPGWKKTFLPKEGGTPKKNEIIFTAPTGEEITTKKQLEQYLSHPGGPP  
VAEFDWGTGETPRRSARISGKAKAAPSPAESAKKRSRKSSASKKDAKANEDPEETEP  
KDDDMEEAEKHEDTVAMEAEKDVEHKQVENQDGETEVEKKEEAQATEKDLQKKDEIQS  
ENDVVKENPDEKKDEGQNADGKVEDVPSDEAQDEKDVKMADNVGHPEDVEVAPVDKA  
LDADSKVEDVPVAAEAEVEKDVKIADNVGHPEDVEEALVDKAAADGPEATKMNEEIDVQV  
QEKEENIPTEAEKVDSSADEGKKHQVVGGEQKDEQKTSATGSIEDQDNVMNSEISKVEGG  
VTENGSGNGNEAKP

>PhMBD11

MASVTLDPSSTITEGPPPPALQAESIPTVDLNLQSSELYSLSLCSPSAFNPRLRHDDVIIPKI  
DRSVFNESAGSRKQTY SRLRLAPASSAPGPGPRSRTPHLRSNFPQTSFQNNNTNDPENTQIVS  
LLKQLFGSGQMNP SNLIPVRVDYSNFVPTVPPELDNVGGVKRKRGPGRPRKGEDVVMKD  
IVVYQNVVDDDRDKDKDKEIVNKDGEQVDLTGLGAMENPFGEELRKRTEGLVSAEELLG  
FLERLNGEWGSTRRKRIVDASEFGNVLPKGWKLLISVKKKEGRVWLHCRRYISPNGRRF  
DTCKEVSSYLLSLHGERNENVPAYAKSSETVEITNTCALVSTSDLRVQDGAEKESAPSHNS  
SPAVGPGELQVLLNFGELSEVQVGDLLQCDKCNVTFNKNDDLLQHQLSSHRRKRSRNGQ  
SITDGVIKDKGFECQFCHKTFEERRRYNGHVGNHVKYQGKTAADGSLINVGKCVPEVV  
SSGAMLTEVIVQDSVASARDMTENV DVRADVGN NPAPPSKIEEDHMETDDKLEGRCEAM  
DTPV PNKTNLCLSSSEVVTLNKN DNNCCGTLADSLIVDNVTEGTN KDFHNQEGSSSESCFPISL  
TEKCTNKS NVIVCSIIIEPKQESLLCSNGIVDSCGVS MEDGKFPPTLDESKVVTDRFVDNE  
STNALCSNLGVLDENTLVSAEQVPCAEDYSGKNIDLLNGVSFLAETSRDTRGLKSSTGTPN  
CEEESTVDHVQGVLSGSIGEQKPNSTCDITNDECGSLVDPNDNKLTMKEDSCSFVLPPE  
HVNIADRDVSDVSVC FLEEPERRIGDKSGLPSPARENSSGVEAQFFDGSKTTSYEPKISELQ  
SVGSNKLGFPSGNNHAVQKVDECAIENEKGLALCSFFPATDKRVSHAQDHDSKVYQSTTE  
VNDQQSSASALFSSTYVPQASTKEYTMNRSYSNPLNFDGLENSRHRDQNVVFGNSHVDP  
NLNSTHNNRYITEKSTFQLSMDGTYAVQDNLHRRLETDRQGEVGVNLSESAFAKGTGDFE  
SNFMVVFHSQSCDGGKVDEVGNSGKKIVTGFGCGNAKTNEDAVAGSIWRTGVENVMQG  
GSVDNSTSAVQSSNCFQTYDVM SDKVQGLFGENEKYDGTGTFDGLRSDRNEPVEYSFMS  
AHSLSNLQEEPRVLPYDVIDIDQGFNSSFWLGKDDLMPNLADRNQ

>SIMBD1

MATVAPTCGPKLET LAHIDISKFSQSELHEL SLCSDSAYDLRRTNEVVIPQIDRSLFNESAGS  
RRQTY SRLRHQHHR SRVPGLHPSTS QPKPPCTSDPENHAILHFLKFFIHNPNSSQSPPPPITQ

PATSGVQEKTLMLMNEPDKKRKRGRKSKDNKCLKENGVEILNKNGEVVDLNNLENNGD  
KLYSGELEKRTVRLQTEEEVLGFVRDLDGQWCSRRKKRKYVDASGFGDILPIGWKLLLA  
LRRRDGRVWVYCRRIVSPTGQQFISCKEASSYLRSFLSGEANQPTQQVDDTVAKSMSNF  
HSDTSLVLSTDIQENPHSLQKGDMAKHNVVAHAVPSSSTLHLHLSDVCLMEMDNLPEV  
KVQDIFECYKCKLTFEEKNAYLQHLFSFHQRTTRRYRVGPSVGDGVIIRDGKYECQFCHK  
VFEERRSYNGHVGVHVRNNARGTVDIAAAVAADKGVQSPHHDGLLSRTCKMDALIEIAQ  
NAVETSSARPATKDSSMPSSSTSTDLDGNMSTNIDQVARSTTDIGLSDTKEFMTETCLEQG  
RNQPDYTCVQVTKDKSSEILANKFNLRVISTNDSEQPEGDDAKKAGSNKVQGPNGKQT  
KENDDVRPETMELTFQEIASQNALTSSSVSMVQSLHNNFEHSEEGVGKKDGTDNVAVGK  
GNSLTKANDVELETMELTFQDDATLDELTFNLSMVQPSHSAFEHPESDDMKKDGNNQQ  
AVCPGYSLTKANNDLESETMEFILQQNAIRDGLAGFSEPMVQSFHNSTGILSGSSKDNDEV  
SAIGQNLNNGTGFEELRLDEIDHFEYSFDGGHESSSLPATSIGLGNDARMKEAFASVGFDS  
GGIILNMEELNQLSTVCVWCRVEFKLEAYDTEAHSDSIGFMCPCDKAKISGHLESVFP

>SIMBD2

MGKKRGLPNWVPDGWKVEVRTRKGKKEKWIYIDPSKGLKFCSKADVLHYLSSVDSNCS  
KSSNTKEMENKGTNKCIEKTASEGLPPGWIKELKVRKKGRKIRKDPYIYIDPVSGQTFRSL  
KQVSRFLETREPGRFESKPDDKCPDTLELEEPSLFPAAEQISLDCDASCKEVNSNQKL  
KLGAEHMAHSSCVEGSMSSCEGLGDABAENAAEEKIDKVVSDDPAIEEHREKDDDGEVVS  
NTVSGGHQEKEDIGKVILATASGEHQEEDDDGKVISATASGEHQEKEDDGKVVSKTVNGE  
NQDKPSLDGVEKHDQKTFQRKRKKGMNMPSRASKRLAGIKADTSLKLQTNQDTQLTSV  
RQQEGTQAATSDNPLNFTNTSKHVASTVTGITINKKVETGNLTIKRKQHLVTSPQTEGEKK  
PSPAEPAKTVLASCDVDKKGETALESSSDLWTDPCIEFAIKTLTGTPVINEKKLDEIPGSSS  
SKPSVNTPSSVGLPSDEIWADPCFMFAVKTLTGEIPIGDELCSQKIVQQQCTSSPNIRFEFEG  
QANLPRYAAPEMSSYKQQPAVAPNAYQNRWFAKFGSHRPSPLC

>SIMBD3

MASNNMELPAPLSWKKLLMPKKGIRAKKNEVVVFVAPTGEEIRNKRQLEKYLKTHNGNPG  
MSEFDWTTGETPRRSARISQKVKAMPLPAVLEPAKKRQRTSSSTKKEEEMDAANAEN  
MDKKEMESVIEATEGLENKENVVDNETVDKEVDTEHKKDEELSGGEVLQKQKSEASND  
ALVEDGGKLAQNGIEDTIVEVEIEDKGDEMAYKENIEHKIEGEISGTEVSDRKTETSNDT  
QFGDGSKMAENVSVVTTAIDADFWNDSMDKDYFKGAFANAVIGDTNAAEAGIEVGEKP  
GYGENLESQIDIEISGADDMNHDMMPDMVASERNVAGGETFNIQDPAFVEGTGGFHEEHRP  
LEEEKNKNSTGLVMDNGQINQPERAHTPQHQSATISC

>SIMBD4

MASVTVDSSSATVPDGAQAEISPTVDLRLLSQSELYSLSLCSPAFAFNPCRDDDVIIPKIDRS  
VFESAGSRKQTYSRRLAPAAATASASSAIRSRTPHLRNSPHPLQNPSNNGPANSESSQIVT  
LLKQLFGSGTQKNPTDLVPIRVDYSDSLSVPSHVPVPGLELANVGSIGQKRKRGRPRKNEN  
GVRVAEVKVDEVVKDIVVYQNVDDSDKEIMNKDGIPVDLAVLGASVDPFGLLELRRRTEG  
LGSAEELLGFLGRLNGQWGSTRKKRRIVDADDFGSMLPKSWKLLLSIKRKEGRSWLHCR  
RYISPNGRQFGTCKEVSSYLLFLRGERNENLPTYVNGSGTVEITNACALTSDLRIQDGGKK  
ESSVFHNSSPAVGHGELQVLLNFGELSEVQVGDLLQCDKCNVTFNKNDDLLQHQLFSHQ  
RRKSRNGGQSITDGVIRDGKFECQFCHKTFEEKHRYNGHVGNHVKKQVKTVDGSLPIK

MGGGIEPVVPSGAMLREPIMQDSVVLPRNLTENAGVITDAGDNPAPTTKIQEDHMETDNK  
LEAEGTSNGCHNQEGSSVSRSPISSNEKTCVDISKVIVGSNIEEPEQEGLLCSNDIVDSCGVS  
MEDGKFFPTVDESKVENGRSVDTDSTTVLCSNPSPGGNSLIKARQIPHTEDHSGKNIDD  
MNGVSFLAETSKGNRYLKSSTGTPSCDKEGSTVDYVGVLSGCIGEHRPSSIMSDIENKECG  
SLNSNDNKLIMKEDNNSIAQHLDKHKVDTAERDAVDVSACVLEELGQKKGDESSLSPAC  
DKNSEVESLIFNDLKTSAECPKISELQSVRSNIVGFTSSDNYAVKKVAASDTEKEKSLAFCP  
LFPAMNARASCAEDHDTKVYQSTLEGNDLQRSANALFSTTNVPEASTKEYTMHRSYNNS  
LKESKFDGLEHPRHDLNVVFGNSHVDLSANLNCTPFQLGMEETYGVQDNLQKRLETDK  
HGEVGIDLSDSSEFKGKTGDFGSNFNTVFPSQLWNEHKLNEVDNSGKKIITSFGCGDAKPNE  
DVMAGSIWRVGVENVMQGGSAGNSTSVAQSSNCFQTYDVLSDKVPNLYGENEKYNGNT  
GFDGLSSDRTGPVEYSFMSTQSSNSLQEEPRVLPYDVDIEQGFNSSFWLGKDNLMPNLAG  
SNQVTMVIYMLPFCFAFLQKIHWMLECGWC

>SIMBD5

MERDQDAHLKNKVADEMEFVVQCSKCFKWLYIPTEERYD SPIRKGFRSIPEDESYLKQH  
SEYASQGVKLEKFSF

>SIMBD6

MERDHLDIATPGKADHNDIYGSSVASRRDKVKHEPKDSRSSASAGGIGTSNQNPKDVASL  
AEEEEHNTDDEDNHSEDAQKQLVLYDPAAVGADEIALDADPVNSQPRRNSFPNYTTRLLP  
SVGAFTVQCANCFKWRLIPTKEYEIREHILEQPFYCETAHEWRAELSCADPPDLTQDGS  
RLWAIDKPNIAPLLGGNGF

>SIMBD7

MASPMKGSHDDEIVSVELPAPPSWKKLFTPKQGGTPKKSEVVFIAPTGEEVKNRKQLEQ  
YLKAHPGSPGISEFDWSTGETPRRSARISEKVKAMRPPSLLESPKKKRRTSSGTTKDSKEK  
AAAKAEMGSAETKGMESKEENENLEKKAGEAEAEMQDKGKKEAEAVVEDERIEDAKL  
PPAEKPDSESEEFHSADDGNQDKSENAEAEMEDKKKKEVEAVEKDKCLKGAELPSGDER  
EPESEEVHSADVGRHKSENAGIEEKQVSEEKLESQNKLEELAAEGTNVTVGGSAGQAEH  
AVDGVSKDAHSNDGEDGPKEEEKKTEGTELAMENNNINQPGLVHPQQHQSPAPISC

>SIMBD8

MAKDSPKTPKRSATNP SVGVWAVQCEKCLKWRRIATQE QFEDIRSRFTEEPFNCPNGTCD  
DPADIEYDASRTWAIDKPNLPKTPSGFKRELYLRRDYSKMDTYFTPLGKKLRSVTDVTTF  
LEQNPQLSDVKPSDFSFTSPKVMDDTIPSTALLANSHKKGVASSTK

>SIMBD9

MSSSVEMNEVVSIELPAPNGWLKRFLPKKGGTPKKNEIVFTAPTGEEITTKKQLQQYLKSH  
PGGPAITEFDWGSGEAPRRSTRITGKAKTAPLAAESVTPTKRNRKSSASKKDVKDKKEQE  
ETEAAKDVDMP EADKQEKDGVSV EAEKHEKDAVAVEAGKHEKDAAAVEAEKV VVQKH  
DEGKDENKEEMPSTDVGIVKENQDSKMADHTAEQDVQMADHAAEKKDEM HSSAVDVV  
EKNQAEKMGEGQKAGDGPSKEAEVEKDDKMSDCVAEKKDKTSDVD AVKSDDPTEDGK  
AEDAPADVSAADKNVGDAFMVKEVPIGKAADAEATDNGVNTDEINP

>SIMBD10

MERDQDAHLKKKVADEMEFVVQCSKCFKWRYIPTEERYEKIREHLLECPFYCEDAREWR  
PSISCCDDIPDITQKEKKLWAFDKPSIPQTPSGWKIRVKTIRTRGTIFADVYYDSPTTKGLRSIPE  
VERYLKQHSEYASQGVKLEKFSFKTPRSLQQEYSKKRSPTPTPSDDINGANAGMSMCMC  
M

>SIMBD11

MAVEDSPDWPPPWTEDVKVSKGRKIKYYTNGETGKKFYSKKEVARYLKTCDTDDVT  
QAMNIQKKSFSENNVSMDNQDGSFAKDNGSQMDNQDNCCSENNVSQTVGKPNNSHE  
WLPPGWIVELKTRKSGSHAGLSYKVYIDPSTGSKFYSKPEVSKYLKTMKQNNIAGEGQTH  
GDGEISTTNQKKSEDPKIIRGGGQTRKSKRLKSDTDQASPGIEEGSFSLKASQDFEEVGE  
QSCTTKRKKSGITRTTKTYPHSHGAGEVFILNEKTSLGSKENGAQSPQSKRQKPGSGCPSAK  
SVSSVAVDCDSADELPPGWKKESRKNDRGTRNYLLYTDPVHGYKFHSSKEVLRYLQTDG  
ATSCARRPTKRNVASTTKDDSPTTDDASLKRVGGSMTGRQLFSTDELKGGESFGTCSPAQ  
QVESSKKQPDCSVSDPNAIITSILAEINENHSFENVVGDAEIEKHSKATQQSKKSRKTE  
SLNLGRRVSKRLAGQNAEAAADLDLGERALPAVADKSASLSVNACSQELLQDSPTPETG  
NSDQASLNGDPSLDDLPPGWKKEIKITKKANGIRKDPYIDPVDGYVFRSKKDVFRYLQT  
GDISSCAIRPVKRDLDAAMTDSSPTTVDTNSSKKLVCSVTERQPFAAKESRGRKRSVTCSPK  
VQAESSKKQPESASNANTHITSSEADIIVKQNAEISLDTEPEIRDSSADTKVIDAESNAIKRL  
SAVSTPQSDLPSEQQLPENEPEKHISKEKPEQSRRSRACKPLTPGRRISKRLVGHSPEPVADL  
DLGERAFRAVVKKSASLGIPLNVSGQEFQSKNDPTVGTGNSDQAPLSREASGLEFPDGLGK  
EMLTQNEDLTEGTDPTVGSNSDQASLRASGDELSPGLKKEILTHYKDPTVGSNSDQAY  
LSRKASLDEIPPGWEKEMLGQNKYSTVGTGNSDQASLSRKLSPDEIPPGWENQIPPGWKY  
EIPAQNKDPIIGTSNSDQASLSREKASLDEIPPGWEKELAYNKDPAIRTGNSDQASLIRELA  
SADEFPPGWEKEMLTRNKHPTVGTGNSNSLDDIPPGWEKELLVQQKDHTVGTGNSYQSF  
LSKEASVDGLPPGWKTEFRIRKNASVIKKDPYYTDPVHGYVFRSKKDVVMRYLQTGDIRSC  
AVKPTKRDPGSTMKDNPSTHDTSSKKLRCSLTGIQLSATDESKGSKCSVTCSMALQAENS  
SEHPKSSMFNLNTSISSIVADITEKHSYENLNEDTEIRLDVEPKIRDSVGNTKAAAETVDV  
RRSLVVSPQLDFLPEQQLRENEKEKHSNKGVPARLRKIRNSKSSTPVRRVSKRLSRHNPEM  
VTDNLGERALHSVVNSSASSGLPMNVSGGQSAQQTDLATGDSQPSLSRKASSRDDPLE  
VVKCLSEGQAFKENIDERIWRDSQPAGISYERGKVHLEQHALNERPTAKPAKEEEDGQNR  
LLNNSQLAESASGRRVFPAEDRSVSESTVEEVSEKRNGEYKQWQYPQLAEPWRSVDL  
NVENQQWQDVQLAPSQRFDLNMENQEWQDLRLPPSQRSVDLNVGNQQWQASQLAEP  
SHRNLDLNVDSQPVKEKQTGELVTENQDEQNRLHAQLASYPFGDYWSDPCMEFAFKTL  
TGALPVEDTLTFQGSTHQEYNTSYTQADDGCFELPLFNTSSFYLNDAPNHCAPSVEHVVK  
EQPPINQTFPLTGHNSIPGHSSVVSQNPGLTFLPNGNNSIPGCSSVVSQNPGLNTQAKDYQS  
KFKSHR

>SIMBD12

MEFAVQCSKCFKWWYIPTEERYEKIREHLLECPFYCEDAREWRPSISCNYLPDITQEKKYG  
HLISLVFLSLLRDGNKLYYDSTTGIRLSIPEVKRYQHSEYASQGVKLEKFSFKTPRSLQQE  
YSNKRSPMPPTHSDAINGANAGMSMCMCM

>SIMBD13

MLVLKRRLQMKWSLPCSDLNVSNGATYLQRRDAPEWRPSISCNDIPDRTQKEKKLWAFD  
KPSIPQPPLGWKRIVKIRTRGTNFADVYMKQHSEYASQAVKPEKFSFKTPRSLQQDYAKKR  
SSTPPTPSDYINGDNAGMSMCMCM

>SIMBD14

MTKVDAADSFIQPKIDTSDDFINDGIYSLLLLPPGTYIDVELDAREDITITPNKGDVPYEGNL  
SFVPRSKLKIRRKIAPIHHVNLDRLWLSDQWKFETKVRTIGATVGRVDKLYIEPIFKSKFRS  
KLEVEEFLKTGCKRTRKKYCHNHDGAT

>SIMBD15

MTEAASVSSIPATVTGDDFRDDSLPRDPLLQSGTYIDAESNVDTPPNKGVRPNAGNVPDL  
TPAPAEGTQEIQSVDTVAQTVTPLRYGSRSAEVSVERPTWLPESWRFEAKVRTSGATAGTV  
DRYYYEPVTGSKFRSKTEVLYFLETGGKRKKAITGTTGSGTDATPSETPPIKKQKKSISKTK  
KVTSFYFDSGNPPQSVCWVQTDTSADTWTWSCNGSVVPGTRKQEWDAVFLSVSKLKRRN  
TQTGR

>SIMBD16

MENKDVAVEKTDAGPIELPAPPGWKKRFTPGKSSTPRRYAIVFVSPDGDEIKNKKQLDKYL  
KSHPGGPPASEFNWGTGDTPRRSSRLGGKSEAMETPESDTPSTKRQRKSSSKKEAKEDGS  
ERKAEGATEKETKANDEPALPDAEDLEAQDDEMASKNLTDGDNTKDEKEKTNDEIVPK  
EPLPSESEDKMEIVQEKEEILDEGNIEKMKNREAEKPLDNSLKTNDKTLPLNVLEENKIE  
SKPAGTDASSLSVEHSKSTSGSQEEIAEEAPAAEDALDALEENKIESKPAGADASSHSAELS  
KATSVSQEEAPAAADPLVQNSNDGKVENEQIVREIPIEEINGTESAAACVNNSVQQEATVI  
NQATSS>SIMBD17MEKQNSLRRHRSGAEYPTSGQLTASSSAITPYRPLSSRFKLPPGWGIE  
QVLRSSGDRVDRIYYYEPGTGQKFRSLRDVERRLNGEIFAPRNRASGVRNYPKSSLSRKMV  
ICDGKIVRMDEEQLNEWAIVPSTRAATLPYDLDPDGWVIEEVPRTDGSSMVDKYYYEPGSG  
QKFRSRIAAQRYLAQMRENVPLSATLEELKENKPLSKMFKLYHHAKVKISSM>SIMBD18  
MAKSVEKNEVVSIELPAPSGWSKKFLPKKGGTPKKNDIVFTAPTGEEITTRKQLEQYLKSH  
PGGPPVAEFDWGTGETPRRSARITGKAKATQSPTESEPAKKRGRKSSASKKDSKDKEVTK  
ETEAAKDDDMEEAEKHEKDTAAMESEEDVEKKENENPNETQDGESEVEKKDEIQSSEKD  
VVKENLDEGQNVHDKVEDAQVEKDVQMAENVGPSQDVEEAPVVKAADGPDATKINEE  
EKDVQVQVEVEKVPTEEAHIEKDVKMADNDVEEETPADKTAVGPEATNINEEGKDVQVQVE  
VEILPTEEAQVEKDVKMTDNIGHDPDVEETPADVPEATKLNEEEKDVQIQESENKPNEEA  
QVEKDVNNVEEALAEKAAEEKDVQVQEAKEKVDPSAAEELKHAEGKSTDDQDNLMNIE  
ISKVEGEVTENGSNANEAKP

>CaMBD1

MPVGDSSDWPPPGWTEDEVKVTNGRKIKYYTNVETGKNFYSKKEVTRYMNTKETCHDVT  
QAMNDQDKSCSENNVSQMNNQDKSCSEKNARQMNNQDKSCSGKNIGQMNNQDKSCSE  
NNVSQTVGEPNNAHEWLPLGWIVELKTRKSGSHAGTTYKVYIEPSTGNKFYSKPEVSKY  
LKTMEQNIAEGQIHGNGEVSSSNQKIPEDSKSIKGGGQSRKSKRQKSDTDQAVHGVEEE  
SVSKKKASQDSEDVGEQRRISNRKKSNTNRSTKTSSHGAGEDFPLNEKTSLGSKENSEQ  
SPLSKRQKPGSDSPSAKSVSSVAGSDSVDEFPPGWKKEFIIQENDRGTRKDLVYTDVPVHG  
YKFRSKEEVLCTYLTGASRCARRPAKRVASTTKDDSPLTDDASLKKSVCFMTGRQLFA

TDELKGAKSFGTCSPAQQVESSKKQFDCSVSDPNTIISILAEINENHSIENVIEDADIESVK  
VGVMHPSAVSTKSDLLPEKQLLENEQEKL RHKA AKKQSRKSKTKESLNLGRRASKRLAG  
QNPEAEANLDLGERALPLIVEKSSSPSLSMNVCRQELLQDSDPIPETGNSDQLYIDPVHG  
YVLRSKKDVFRYLQTDINSCAIRPVKRDKDATMKESSPTAANADSKKLECSVTERQPFA  
AKESRGRKRSDTCSPEIQAKNSKKQPESRESNANLIVTSSAADYAKHSDENVNIENAGIRDS  
SADRKVIAAQSDAIKKSSAVSTPPSDLTPEQQLPENEHEKHINKEKLEQSRRSRTKKPITPG  
RRISKRLVGHSPEPVADLNLGERAFRAVVKKSSASLDIPLNVSAQEFSQNIDPALGTGSFDQA  
SLNREASGNEFPDREREIPIQNIDPTVGSGNSDQASLRDASGDELSPGLEKEMLAQNKD  
PTVGTGNSDQASLSREASGDERLEKETLAQNKDATVGTGDSQASLNREASGDKLWPGL  
EKEMLAQNKDLTVGAGNSDQASLSREASGDKLPRGLEMEMFAQNKDPTVGADNSDQAS  
VSREASRDKLLPGLEKEMLAQNKDPTVGTGNSDRASLSRKASGNELSPGLEKEMLARSK  
DRTVGTGNSDQASLSRKASGNELSPGLGKEMLAQSKDRTVGTGNSDQASLSRKASGNEL  
SPGLKKEMLAESKDRTVGTGNSDQASLSRKASGNELSPGLEKEMLTQNKNTVGTGNSD  
LASLSTKASLEEIPPGWENEILGQKKYPTVGTGISGRVLSRKLSPEIPPGWENVIPPGWK  
NEIPAHASSLGEIPPGWEKEILAYNKVPTIRTGNSDQASLSRKLASADDLPPGWEKEMITRN  
KVPVGTGNSLDDIPPGWEKELLFQTKNPKVGTGNSNQSYLSREASMDLPPGWTMEFR  
MRKNARGKDPYYMNPMEHYVFRSKKDV MRYLQTDIRSCAVRPTKRD PYSTMKDDSPS  
NHDTSKILGCSLTGSQLSATEESKGRKCSATRSLALHAESSNEHHESTVFNLNTSISSTVA  
DITDKHSCENVNEDANIGVSMRSRKMKNSSSTPVRRVSKRLSRQNQEMVADIDPGERAV  
VNNSASSGLPLDASGGELAQQPDLATGDSQPSLRRKASSRDDPLKAVKYLSEGPQFKEQ  
KVVNGLTSEKQNDEIILRGSQPARISFESRKFHSEHQAVKESPTAKPGNEVQDSQYRLLNNS  
RPVELASGRMVFPVEDQYVSESTIEQVSEKRDYENRQWQDSQLAEPWSRVDLNVENQ  
QWQYSQLAPSQRSVDLNVENQQWQYALAPSRSVDLNVENQQWQYSQLAPYSQPAPS  
RGSVDLNVENRQRQYSQPAPSQGSVDLNV EKQHSQPAPSQRSVDLNVENQQWQESQLAP  
SQRSVDLNVVNQQWQDSHLAPSQRSVDLNVVNQQWQDSQLAPSQRSVDLNVANQQWQ  
DTQLAEPQRSVDLNVANQPIREKQTGELVTENQDEQNRRLLHAQLASYTFGDYWSDPCL  
EFAFKTLTGTL PVEENTPFQGS AHQEYNTSYSHADDGCFELPLFNTSSFYMNDVPHHCAPS  
EEHIVKEQPPINHTFLPNGNNSVPGCSNVVTQNPGLAFFPNGNNSLPGYSNVSQNSGLDPH  
AKDYQSKFKSQR

>CaMBD2

MEKNQVLPVELPAPPSWKKLVLDICIRVLSILLVMSEEFCIASYLPLPGWLSSVSFEAMPKK  
SVRAKKNEIVFVAPTGEEIRNRRLQLEKYLKTHDGSPISEFDWTTGEAPRRSARISEKVKA  
MPPVAVLEPTMKRRRTATKKDEDVASVEKENMGKKDMEPAIENKEGLEEEENDVEDEVV  
DKGKDEQTAKEVET EYIKELEMFDGEAPKRQKYKACNDPQSEDGGKLAENV TQETAVEV  
EMENKEDEMGAIKGTADHKKEKEMSDREVSEKIEASNDPQSEDGGKLTENVARETAAE  
VEMENTEHMANGANKEAADHKKGEEMSDREVSEKIEASNETQSQVEDGGEMAENGRG  
VTIAIDANIWNDSMGQDYFMGMFPDAVIEETNVAEAGAEVGENLVSQTGKDISADDMNR  
DIADKVAPEINVAVGETYNIQDPAFTGETSDYHEEHRSL EEDKNKNRAGLMMDSGKINQP  
ERAHTPQHQAATISC

>CaMBD3

MGKKRALPNWLPSGWKMEVKARKKGKKEKWYSDPSKGVKFCSKADVLHYLSSVDSNC  
SKSSNMKELEEKDTEKCSTEAAASEELPPGWIKELRARKKGRKIRKDPYYIDPVSGQTFRS



MKQVSQFLETRESGRIESKPDDLCSGTLELGEPSSSLPVEADKQISLSDASDQVANSNQK  
LKLGAEHIGHSSCVEGGMSSFEGDSVPENAEKENVGKVVPNTTSGEHYKKDDGKVVS  
ACGEHQEKEDHGKVVSDPASGERQENEDDGKVVS DPASEEHQEMVDDGKVVS  
DPVSGE NQEKQSPGVKKHEMETNQKRKQGVNLP RRASKRLAGIKADTSLKLQANNQIHLATVRQ  
EGMQAATTDNPVNFINTSKHVATVVTGITISKKVETGSLAIKRQQDLVTSPQKEQEKPSPAE  
PAKTFLASREGDKKGETALESSLHDLWTDPCIEFAIKTLTGTPVINEKEVGEVQGSCPSTAS  
ANTPSSVGLPSDEVWEDPCFMFAVKTLTG EIPGDNLF SQKIVQQCTSSQFQGNNGLVLP  
NIRFDEFVQANRSQLGAPEMSSYKQQPAVAPNACQNPWFTKFGSHRPSPLC

>CaMBD4

MLKQLFGSGSSTAANPTDLVPIRVSDSFSVPAPAPVPVPELGNVGSIGQKRKRGRPKRN  
ENSGVVEVKAADVEVKDIVVYQNVDERDDRDK EIMNKDGV PVDLAALGALED PFGQ  
ELRRRTEGLSGEELLGFLGRLNGQWGSTRKKRRIVDAGEFGSTLPKGWKL LLSVKRKG  
GHAWVHCRRYISPNGRHFGTCKEISSYLLFLHGERNENLPTYAKSSETVEITNACALVSTS  
ADLRVQDGGEKESSLFHNSAPAVGHGEFQGLLNFGELSEVQVGDLLHCDKCNVTFNNKN  
DLLKHQLSSHQKRRSRNGGQSITDGVIIKDGKFECQFCHKTFEEKHRYNGHVGNHVKYQ  
LKTADGSLPIKMGGYVEPVVSSRAMLREPIMQDSVVPLRNLTENAGASVDDGDNHAPPS  
KIQEDDHMETDDKLEGPAEGTNKGCHNQEDISSDRLVDAESTTALCRNASLPDENSLISAR  
QVPLTEDHSGKNIDVLNGVSFLSETSKENRDFKSSLGTPSCDKEGSTVDYVGVHSGQDSY  
SFVPHPEHVN TAERDVTDVSACVLDGLAQQKGDGSSLLSPSCDKNSEIESQIFNDLKRSA  
DEPKINQLQSVTSDIVGFTSSNNHAVQKVDASNIEKEKSLAFCSLFPVTNARASCAEDHDT  
KVYQSTMEVNDQQRSASALFSSTNVPEASTKEYTMNRSYNNSLDESKFGLENSRHHDLN  
VVFNSNHVDLGANLNCTTFQLGMEETYGVQDNLHRRLETDKHGEV GIDLSNSTFKGKTG  
DFGSNFNTVFHGLWDEQKVDEVDNSGKKIITSFGCGDAKPNEDVMAGSIWRTGVENVI  
QGG SADNSTSVAQSSNCFQNYDVLSDKVHTLFGENEKYDGNTGFDGLRSDRSGPVEYSF  
MGTHSLNSLQEEPQVYIEQGFNSSFWLGKDNVMPNLAGRNP TTVVCVWCRNEFYQEPD  
QLGAEAGSIGFMCPTCSGRISGQFSFM

>CaMBD5

MERNHLDFASPEKADHNDIHGSSVTSCGYSMKNEPKDSRVSAGSGVIGTSNQNP RDVISS  
AEGEEHNTEDEDN NSEDAQKQLVLYDPAAVGAGEIELVADPVDSQPRRNSFPNYASRILPS  
VGAF TVQCANC FKWRLIPTKEKYEEIREHILEQPFYCETAHEWRAELSCNDPPDLTQDGSR  
LWAIDKPNIAQPPPGWERLLRIRGEGGTRFADVYYVAPSGKRLRSMVEVEKYLQEHP EYV  
AQGVSMSQFSFQIPRPLQDNYVKKRPYR PALAHDEIEPGMPGPFEP LHL>CaMBD6MEEF  
EEIRKRFVEEPFHCNNKPNGSCDEPADIEYDSSRTWVIDKPNLPKTPSGFKRKLYLRQDHSE  
MDVYYIAPSGKRLRSIVQVRAFLRQNPEFADISVSDFTFTTPKVMRNAASSNAVLN SSSNK  
GAASTEQNECVD

>CaMBD7

MAKDSPKPPKTTTPRAPTNP TVSIWAAQCGKCFKWRTLSTQEEFEEIRS RFAEQPFNC DNKP  
NGSCDDPPDIEYDSSRTWAIDKPNLPKTPSGFKRELYLRDYSKMDAYYVTPTGKRLRLI  
EVGNFLQNNPEFSDL SVSDFS FVSPKIMDDTIPSTAVVANSNKKGAPGTAK

>CaMBD8

MGLVVKMLEADTVITNYTRGRCRSILMTLRGKGLLKNLFTDNKPNGSCDDPADIEYDPR  
WTWIIDKPNLPKTPSGFKRKLCLRNDHSMKMDAYYIAPSGKRLRSLVELCSFLQQIPEFIDIS  
VSDLTFTSPKVMDDATSSKVLPNSSNKGAKENAHSFDLPCGSKGRLDCTCMTDLYVK  
VPEE

>CaMBD9

MGNALKGGQFQHRKSLWKFKEGFLNNPLTAIEKTNLNPNAPSGFKRELYLKRDISKMDAY  
YFNTGKRLRSLTEMGNFNQNPFEFSDLPVSDFSFFIPKVMDDTIPSTTILSNSNK

>CaMBD10

MATVASTCGPTLESFAHIDITKLSQSELHALSLCSDSAYNLRRNNDIVIPQIDRSLFNESASS  
RRQTY SRLRHKHHRSRVPGLHPSSSQPKPKPVSTSYPENHAILHFLKYFVNNPNSQSPPPPP  
PPPPPPVPLPPVHPPVPIQPDTSIGQKTLRSRKRGRKRKDDKKVKVEMVNNKKGEVVDL  
NSLENNGDRLYSEELEKRTVGLQSEEELLGFVRGLEGWGSTRKKRKYVDASGFGDALPI  
GWKLLLALRRRDGRVWVYCRRVVSPTGQQFISCKEASSYLSRLLSGEASQPSQQVDDT  
VAKSASFHNDSLVLSTDIQENPHALQKSDVAKHDIVAHAVVPSSSTVDLHLSEICLMEM  
DKLPEVKVQDIFECYKCNLTFEENAYLQHLFSFHQRTTRRYRVGPSVGDGVIRDGKYEC  
QFCHKVFEERRSYNGHVGVHVRNARGAVDVAAAABAANKGVQSPHHDGLLSRTCKMD  
ALIEIAQNSVETSSAKPVTKGSTMPSSSTMDLDAIMATNIDQVARSENTETGLSDAKEFKA  
ETC PERGRNQPDNTCSEVDKDKSGEILVNKFNPVISTNASEQPEGDDVKKAGSNKLMQG  
MGNKQTKENNDVQPGTMELTFQEIASQNPSTSSSVSMVQTLHDFEHSDEGVVKKDGIDE  
VVMGKGNCPTKANNVESQTMELTFQGNATLHGLTSSSASISHGAFEHPESDNMKKDAND  
QLALCLGDSLTEANADAESKILEFSLQQNATRDGLASFLEPMVQSFHNFTGIISGSSKDNG  
KVSAGQNLNNGTGFEELRLDEIEHFEYNFDVGHVSPSLPPTSIGLGNDARMEEFASVGF  
DSGGIILNMEGLNQLSTICVWCTAEFKLEAYDREAHSDSIGYMCPCDKAKISGHLESVFH

>CaMBD11

MSGVFITVIGKETKWPIFWLIGVAGVEKRFSVWTTTGCLKMLELLPKRGGIPKKNAIIFTAP  
TGEQITTKRQLEQYVRSHPGGPSIAEFDWGTGDSPPRRSPRIEKQKATQSPAKSEPAKKRSR  
KSSASSASKTDTAVLEAQKDIEPKEDENVIDGESEAEKKEEAETTEKDQVKKDEMOSSEN  
DLVKENLDADGQNADDNVQDSPSEAAQVEKDVEMADNVVHTDNVEEAPVDKTADGPE  
EEDARVEEVESLPTEEVQVHPDHAEVVPADKAVDGEATKINEEDVLQVQEPENKRTEEA  
QFEKDMKLADNIGHPNVDDEAAADKAAEEKDVQVEEVESIPTEAEKLDPSAAEEKKDQA  
EVEQKAAAATKSTGDQDDLTDNIDIINVEGELTDSGSNANEARP

>CaMBD12

MVCMDQEKLNEWAIVPSTCAATVPYDLPDGWVIEEVPRRDGSLVDKYYYEPGTGLKFRS  
RIAAQRYLAEMREDVPLSTSLEELKENKPLSKMFKLHHHARKSPPCTRNVRENSDKSSFL  
SPPAKVNWVLSSPRGDWNPFIAGTPIPD SVKQWTKRFMLLMNDETNAENSN

>AtMBD1

MLPFPAMNLKKSRSSENSSVASSGSKIEEQTEKSAEPTTIKVQKKAGTPGRSIDVFAVQCEKC  
MKWRKIDTQDEYEDIRSRVQEDPFFCKTKEGVSCEDVGDLYDSSRTWVIDKPGLPRTPR  
GFKRSLILRKDISKMDAYYITPTGKKLKSREIAAFIDANQDYKYALLGDFNFTVPK VME

ETVPSGILSDRTPKPSRKVTID

>AtMBD2

MSMSQSRVQRSSSPNEDRGENQLVVYDLKGNDDTEEEVLVPVQSQPLSSRTQCPSIGAFT  
VQCASCWKWRLMPSMQKYEEIREQLLENPFCDTAREWKPDISCDVPADIYQDCTRLWAI  
DKPNISRPPAGWQRLLRIRGEGGTRFADVYYVAPSGKKLRSTVEVQKYLNDNSEYIGEGV  
KLSQFSFQIPKPLQDDYVRKRPARLLDSIDNTNTPVAKEANPLAWISPDDHISLQLGTPTES  
GLNNSHYQPSKKKKKTSTLSIFGSNDELADR

>AtMBD3

MCVVKTTLIDSYAAQCWKCLKVRSIESQEDYEEIRSKTLEKFFECKRCEEPGDMVMNFDS  
LTMRWFQDEHSIPKTPQGLKRVLVVRTNCVKVDVYYESLAPRRKRFKSIKEVATFIEDKEE  
FKDMTLEEVSFAAPKRLKLKKKPVDSSHSSSRNTEEDGVSRDA

>AtMBD4

MKEEEEIGKPAKPKAKKDVA PGRLIDTYAAQCDNCHKWRVIDSQEEYEDIRSKMLEDPFN  
CQKKQGMSCEEPADIDYDSSRTWVIDKPLPKTPKGFKRSLVLRKDYSKMDTYYYFTPTGK  
KLRSRNEIAAFVEANPEFRNAPLGDFNFTVPKVMEDTVPPDPKLGSPFPSTTTTTSEKSSV  
KQSHN

>AtMBD5

MSNGTDQAQPPPENPATPVDSKSRKRATPGDDNWLPPDWRTEIRVRTSGTKAGTVDKFYF  
EPITGRKFRSKNEVLYYLEHGT PKKKSVKTAENGDSHSEHSEGRGSARRQTKSNKKVTEP  
PPKPLNFDLNVPEKVTWTGINGSEEAWLPIGDIYKIQESVSQDWDRVFTLVTSQNAGKT  
MF

>AtMBD6

MSDSVAGDFPPDPLLASGAFISSAGDGTLDSSAKRRPIQGGIGISGSGESVRIGMANGTDQV  
NHQTESKSRKRAAPGDNWLPPGWRVEDKIRTSGATAGSVDKYYYEPNTGRKFRSRTEVL  
YYLEHGTSKRGTKKAENTYFNPDHFEGQGSNRVTRTATVPPPPPPPLDFDFKNPPDKVSW  
SMANAGEEGWIPNIGDVKVQDSVRRDWSTAFTFITSRNPSKVSA

>AtMBD7

MQTRSSSSPSANHRRETQLQIADPTSFCGKIMPGWTVVNRPRSSNNGVVDTYFIEPGTGR  
QFSSLEAIHRHLAGEVNDRLRLTRAGSFFQDKTRVYEGSRTKQDHC GVEYASKGFRLPRGW  
SVEEVPRKNSHYIDKYYVERKTGKRFRSLVVERYLRESRNSIEQQLRVLQNRGRHSGKDF  
RLPDGWIVEEKPRRSSSHIDRSYIEPGTGKNKFRSMAAVERYLISVGNITLDSVSMVHSERLP  
LLMNRNGIRFQSEVIDPNPPKKVKWVL TGSGGNMFTANVRGSNVSSLVKHTWSEAFVSLI  
EDRS

>AtMBD8

MDDGDLGNNHHNFLGGAGNRLSAESLPLIDTRLLSQSELRALSCSSSLPSSSASLAASAG  
GDDLTPKIDRSVFNESAGSRKQTFRLRLARHPQPPEPPSPQRQRDDSSREEQTQVASLL  
RSLFNVDNQSKEEEDGEELEDNEGQIHYSYVYQRPNLDSIQNVLIQGTSGNKIKRKR

GRPRKIRNPSEENEVLDLTGEASTYVFVDKTSSNLGMVSRVGSSGISLDSNSVKRKRGRPP  
KNKEEIMNLEKRDSAIVNISAFDKEELVVNLENREGTIVDLSALASVSEDPYEEELRRITVG  
LKTKEEILGFLEQLNGEWNIGKKKKVVNACDYGGYLPRGWRLMLYIKRKGSNLLACR  
RYISPDGQQFETCKEVSTYLRSLLESPSKNQHYYLQSDNKTGQQPVIANESLLGNSDSMD  
SETMQYLESGRTSSEVFEEAKAVENGNEADRVKTSMLMQKDDNADFLNGVEDNDDDMKK  
RDGNMENLATLSNSEMTKSLPTTTNELQQYFSSQINRVQ

>AtMBD9

MEPTDSTNEQLGDTKTA AVKEESRSFLGIDLNEIPTGATLGGGCTAGQDDDGEYEPVEVV  
RSIHDNPD PAPGAPAEVPEPDRDASC GACGRPESIELVVVCDACERGFHMSCVNDGVEAA  
PSADWMCSDCRTG GERSKLWPLGVKSKLILDMNASPPSDAEGYGAEETSDSRKHMLASS  
SCIGNSFDYAMMHSS FSSLGRGHASLEASGLMSRNTKMSMDALGSHNLGFGFPLNLNSS  
LPMRFPSLDPSELFQNL RHFISERHGVLEDGWRVEFRQPLNGYQLCAVYCAPNGKTFSSI  
QEVACYLGLAINGNYSCMDAEIRNENSLLQERLHTPKRRKTSRWPNNGFPEQKGSSVSAQ  
LRRFPFNGQTMSPFAVKSGTHFQAGGSLSSGNNGCGCEEAKNGCPMQFEDFFVLSLGRIDI  
RQSYHNVNVIYPIGYKSCWHDKITGSLFTCEVSDGNSGPIFKVTRSPCSKSFIPAGSTVFSCP  
KIDEMVEQNSDKLSNRDSTQERDDASVEILLSEHCPPLGDDILSCLREKSF SKTVNSLR  
SEVDSSRVDFDKNLSYDQDHGVEIGDIVVEEDSLSDAWKKVSQKLVDACSIVLKQKGTLN  
FLCKHVDRETSEINWDTMNEKDNVILSLSKFCCSLAPCSVTCGEKDKSEFAAVVDALSRW  
LDQNRFGLDAD FVQEMIEHMPGAESCTNYRTLKSRSSSSVPITVAEGALVVKPKGGENVK  
DEVFGEISRKAKKPKLNGGHGVRNLHPPPGRPMCLRLPPGLVGDFLQVSEVFWRFHEILG  
FEEAFSPENLEQELINPVFDGLFLDKPGKDDKRSEINFDTKDSTATKLFSLFDES RQPFPAK  
NTSASELKEKKAGDSSDFKISDSSRGSCVGALLTRAHISLLQVLICELQSKVA AFVDPNFDS  
GESRSRRGRKKDDSTLSAKRNKLHMLPVNEFTWP ELARRYILSLLSMDGNLES AEIAARE  
SGKVFRCLQGDGGLLCGSLTG VAGMEADSMLLAEAIKKISGSLTSENDVLSVEDDDSDGL  
DATETNTCSGDIPEWAQVLEPVKKLPTNVGTRIRKCVYEALERNPPEWAKKILEHSISKEIY  
KGNASGPTTKAVLSLLADIRGGDLVQRSIKGTKKRTYISVSDVIMKKCRAVLRGVAAADE  
DKVLCTLLGRKLLNSSDNDDGLLGSPAMVSRPLDFRTIDLRLAAGAYD GSTEAFLEDVL  
ELWSSIRVMYADQPCVDLVATLSEKFKSLYEA EVVPLVQKLKDYRKLECLSAEMKKEIK  
DIVVSVNKL PKAPWDEGVCKVCGVDKDDDSVLLCDTCD AEYHTYCLNPPLIRIPDGNWY  
CPSCVIAKRMAQEAL ESYKLVR RRKGRKYQGELTRASMELTAHLADVMEEKDYWEFSAE  
ERILLKLLCDELLSSSLVHQHLEQCAEAIHEMQQKLRSLSSEWKNAMRQEFLTAKLAKV  
EPSILKEVGEPHNSSYFADQMGC DPQPQEGVG DGVT RDDETSSTAYLNKNQGKSPLETDT  
QPGESHVNFGESKISSPETISSPGRHELPIADTSPLVTDNLPEKDTSETLLKSVGRNHETHSP  
NSNAVELPTAHDASSQASQELQACQQDLSATSNEIQNLQQSIRSIESQLLKQSIRRD FLGTD  
ASGRLYWGCCFPDENPRILVDGSISLQKPVQADLIGSKVPS PFLHTVDHGRLRLSPWTYYE  
TETEISELVQWLHDDDLKERDLRESILW WKRLRYGDVQKEKKQAQNLSAPVFATGLET K  
AAMSMEKRYGPCIKLEMETLKKRGKKT KVAEREKLCRCECLESILPSMIHCLICHKTFASD  
DEFEDHTESK CIPYSLATEEGKDISDSSKAKESL KSDYLVNKSSAGKDVAEISNVSELD SGL  
IRYQEEESISPYHFEEICSKFVTKDCNRDLVKEIGLISSNGIPTFLPSSSTHLNDSVLISAKSNK  
PDGGDSGDQVIFAGPETNVEGLNSES NMFSVTD SHGGPLDKPSGLGFGFSEQKNKKS  
SGSGLKSCCVVQAALKRVTGKALPGFRFLKTNLLDMDVALPEEALRPSKSHPNRRRAW  
RVFVKSSQSIYELVQATIVVEDMIKTEY LKNEWY WSSL SAAAKISTLSALSVRIFSLDAAI  
IYDKPITPSNPIDETKPIISLPDQKSQPVSDS QERSSRVRRSGKKRKEPEGS

>AtMBD10

MENTDELVSIELPAPASWKKLFYPKRAGTPRKTEIVFVAPTGEEISSRKQLEQYLKAHPGNP  
VISEFEWTTGETPRRSSRISQVKATTPTPDKEPLLKKRRSSLTKKDNKEAAEKNEEA  
ENMDVDKDGKTENAEAEKEKEKEGVTEIAEAEKENNEGEKTEAEKVNKEGEKTEAGKE  
GQTEIAEAEKEKEGEKAEAEENKEAEVVRDKKESMEVDTSELEKKAGSGEGAEPSKVEG  
LKDTEMKEAQEVVTEADVEKKPAEEKTENKGSVTTEANGEQNVTLGEPNLDADAEADK  
GKESKEYDEKTTEAEANKENDTQESDEKKTEAAANKENETQESDVKKTEAAVAEEKSND  
MKAEDTNRSLANQVQQQGAASVSC

>AtMBD11

MGGEEEVSVVELPAPSSWKKLFYPNKVGSVKTEVVFVAPTGEEISNRKQLEQYLKSHPG  
NPAIAEFDWTTSGTPRRSARISEKTKATPSDPKEPPKKRGRTKSPVSKKDAEAGEKSEGGGE  
ENSHVKDTEMNPPEGIAENENVTDKNGSGETERVNDAKENIVAEETPNAAPVQEEGESM  
KEKALDSVDDKSKETDKEKDTGSIEKNSVDVEKKTVEASDEKKNSEAETRNHEENGLTT  
EAEGKEKTAEGEATG

>AtMBD12

MVQCTDCKKWRLIPSMQHYNIIKETQLQTPFVCGTTSWTPNMSCNVPQDGTTCDTWPS  
IPPIPTGWSRSVHIRSESTKFADVYYFPPSGERLRSSAEVQSFLDNHPEYVREGVNRSQFSF  
QIPKPLDDNYVKKRTRPVKRRKSSKDNNCEKGGK

>AtMBD13

MNGEGISDGLSAERKVEIRVRKNGRKDKVIVEKSAAQGLPEGWIKKLEITNRSGRKTRRD  
PFFIDPKSEYIFQSFKDASRYVETGNIGHYARKLKESDIEDDDSGNGKTVLRLEYVDKRSA  
DDVLEKEKTIDDVRRSKRRNLSSSDEHSKNCKMTSDLIVTSQVLEDLGKKKEEVKDPIEK  
QLIAKRVTRSQTASTTEEVVVDLKRNLSSSNAKSEKDSVNSSVRSQPKPKEAVMKEEEE  
QDSSEKRITRSKVEEKKNELSNSVARRTSKRLAGIELEPTPELKTRAKVQRIVPLDDEPTPE  
LKTRTKVQRVPPDDEPTPELKTRTKIQRIVPPDDEPTLELKTRTKVQRILPPDELTPELKS  
RTKVQRIVPPDELTPFEKTRTKVQQRIPPDDGRAGKCKQPVNHVTTSGSKKTEIPLNKEV  
AQSCNEQSSQKPHAAAATSNNRVSADSAVGIQNIGKAVGRKPSKDKKTLKSPLIVYELNPV  
FHLDGYKQKEEMSPVSPLSCQTSATKCEKTAAGKRVGRSSPKANLTTSVKPTQISPLRSPN  
KGKQPHPSDSGSAIQRRNKLANEYSNSSVVRGTCSEVMEKSTNSFSSAFDSTLADLCKDP  
CIAFAIKTLTGESLCLLNTPAISSNPINNHTKQKGVSTPETPGNVNTCSEKLVFPSPPPGANI  
WQDPCIDFAIKTLTGAIPIGLDEPDTSKSKSGMTSTTAATQEAKGRQNNCDYMTNKTVGK  
PDDLRTQSFSD

>StMBD1

MAKDSPKTPKTSSSRSATNPSSVSWAAQCEKCLKWRRIATQEEFEEIRSRTTEEPFNCHN  
QPNASCDDPTDIEYDSSRTWAIDKPNLPKTPSGFKRELYLRRDYSKMDAYYFTPSGKKLR  
SFTEVTTFLQQNPDFSVDKPSDFSFTSPKVMIDTIPSTALLANSHKKGAASR

>StMBD2

MERDHLDLASPGKADHNDIYGSSVASRRDNMKHEPKDSRSSARSGGIGTSNQNPDRVAA

LAEEEEHNTDDEDNHSEDAQKQLVLYNPAAVGADEIALDADPVNSQPRRNSFPNYASRILP  
SVGAFTVQCANCFKWRLIPTKEKYEEIREHILEQPFYCETAHEWRAELSCDDPPDLTQDG  
SRLWAIDKPNIAQPPPGWERLLRIRGEGGTRFADVYYVAPSGKRLRSMVEVEKYLQEHDP  
YVAQGVSMSQSFQIPRPLQDNYVKKRPYPALAPDETEPVNRITWIADNGDTDLRLGMP  
GPPLFEPLSQSFKKKRTPSKRMSNADAACKSS

>StMBD3

MTKADLAISSIPWIIVTSDDFCNDGMPSDLLFPSGTYIDVELDVRVETTTTPNEGDISEG  
KVSDVILSKLQIQRKIMPICRVKLD RPKW LLENWRFETKVSITGATAGIFDRYYIETVSS  
DKFRSKNEYSMTKTRGDIVKLSVPKASKNKKRNAEEVSRSSKKKKIVVEEPKSNSDSDTM  
TEIDNYEDSSAHASDDV

>StMBD4

MASPMEEKGSHDDEIVSVELAAPPSWKKLFTPKQGGTPKKSEVVFITPTGEEVKNRKQLEQ  
YLKAHPGNPAIAEFDWSTGETPRRSARISEKVKAKRPPSLLESPKKKRRTSSGTTKVSKE  
KDAAKAEKESSETKGMESKEENENLGKKAGEAEGEMEDEGKKEVEAVVEDERIEDAKL  
PPAEKPDSESEEFHSADDGNQDKSEHAEAEEMEDKKKKEVEATEEDECLKGAELPSGDKPE  
PESEEVHSADV GKQNKSENADIEEKQVSEEKLV SQNKPEELAAEGTNVTIGGSANQAEHA  
VDGVSKDAHSNDSEDRPKEEKETEGTDLAMENNNINQPGLVHSQQHQSPAPISC

>StMBD5

MGKKRGLPNWVPNGWKVEVRTRKKGKKEK WYIDPSKGLKFC SKADVLHYLSSVDSNC  
SKSSNTKEMEKKGTEKCFTEKTASEGLPPGWIKELKVRKGRKIRKDPYYIDPVSGQTFRS  
MKQVSRFLETREPGRFESTPDNRC PDTVKLEEPS SFP AEADKQMSLSDASGKEVNSNQ  
KLKLGAEHMTHSSCVEGGMSSCEGLGDAVAGENVGKVVSDPASEERQE KDDDGEVVS N  
TASGEHQEKEDDDKAISDPASREHQGKEEDGKVV SATASGEHQENEDDGKVVSETVSGE  
DQEKPSRDGAEKHDQKTFQRKRKKGMNLPRRASKRLAGIKADTSLKLQTNDQTQLTSVR  
QQERTQAATSDNPLNFINTSKHVATTVTGITISKKVETGSLTIKRKKRLVASSQTEREKKPSP  
AEPAKTVLASCEGDKKGETALESSLDLWTDPCIEFAIKTLTG TIPVINEKKVDEIPGSNSSK  
PSVNT PSSVGLPSDEIWADPCFMFAVKTLTG EIPIGDDLCSQKIVQQQCTSSQFQGNGLVL  
PNIRFEEFGQANLPYAAPEMSSYKQQPAVTPNAYQNRWFAKFGSHRPSPLC

>StMBD6

MTEAAAVSSIPPATVTGDDFRDESLPRDPLLQSGTYIDAESNVNTTPKKGVRPDEGNVPD  
LTPAPAEQTQAIQTTETVAGTVTPLRYGSRSAEVNVERPTWLPESWRFEAKVRTSGATAG  
TVDRYYYEPVSGSKFRSKTEVLYFLETGGKRKKAITGSGTDATPSETPPIKKQKKSIST  
KKVTSFYFDSGNPPQSV CVWQTDTSADT WTPSCNGSVVPGTRKQEWDAVFLSVSKLKRR  
NTQTGR

>StMBD7

MEMENKDVAMEKTDAPVIELPAPPGWKKRFTPGKSSTPRRNDIIFVSPDGDEIKNKRQLDK  
YLKSHPGGPPASEFNWGTGDTPRRSTRLLGGKSKATETPETDTPSTKRQRKSSSKKEAKED  
GGAREAE GATEKEAKASDEPALPDAEDLEVQDVEMASKNLTDGDNIKDEKEKTNDGEIV  
PKEPQASEDKMEIVHEKEETKDEKEKISDGEIVPEEPLVSEDKMEIVQEKEETKDEEEKTN

ACEIVPEEPPESDKMEIVQEKEETKDEEEKTNAGEIVPEEPPESDKMEIVQEKEETKDEE  
EKTNAGEIVPEEPPESDKMEIVQEKEETKDEEEKTNAGEIVPEEPPESDKMEIVQEKEET  
LDEGNIEKMKNREAEDKPLDNSLKTNDKTLPLNVFEENKIESKPAGTDASSLSAELSKASS  
GSPEEIAEEAPAAEDALDVVDENKIESKPAGADASSHSAELSKATSVSQEEAPAAADPLVQ  
NSNDGKVHENEQIDREIPIEEIIGTESAAAGVNSSVQQ

>StMBD8

MAKSVEKNEVVSIELPAPSGWSKKFLPKKGGTPKKNDIVFTAPTGEEITTRKQLEQYLKSH  
PGGPPVAEFDWGTGETPRRSARITGKAKATQSPTESESAKKRGRKSSSSKKDSKDKEVPKE  
TEAAKDDDMEEAEKHEKDTAAMEAEKDVEKEEDENPNETQDGESEVEKKDEIQSSEKD  
VVKENLDEGQNVDNKVEDAQVEKDVEMADNVGHSKDVEEAPVVKAADGPDATKINEE  
DKDVQVQVEVEKVPTEEAHVEKDVKVADNDVEEEAPADKPAVSPEATKINEEGKDVQVQVE  
VEILPTEEAQVEKDVKMTDNIGHPPDDVEETPADGPEATKINEEEKDVQIQESENKPTEEAQ  
VEKDVNNVEEALADKAAEEKDVQVQVEADKVDSSATEELKHQAEGKSTDDQDNLNMNIEIS  
KVEGEVTENGSNANEAKP

>StMBD9

MVIYDGKIVRMDEEQLNEWAIVPSTRAATLPYDLPDGWVIEEVPRTDGSMVDKYYYEPG  
TGQKFRSRIAAQRYLAQMRENVPLSATLEELKENKPLSKMFKLYHHAKKSLPCKGNIVTE  
NSDKSSFLSPPAKVNWVLSSPKGDAWNPFIAGTPIPDVSVKQQWTKRFLFMNGENLNAE  
NSD

>StMBD10

MLGQNKYSTVGTGNSDQASLSRKLSPEIPPGWENEIPPGWKYEIPAQNKDPIVGTTNSD  
QASLSREKASLDEIPPGWEKEILAYNKDPAIRTGNSDQASLSRELASADELPPGWEKEMLT  
RNKYPTVGTGNFNSLDDIPPGWEKELLVQQKDHTVGTGNTYQSFLSKEASVDGLPPGWK  
TEFRMRKNARVIKKDPYYMDPVLGYVFRSKKDVMYRLQTGDIRSCAVKPTKRDPGSTMK  
DSSPSTHDTSSKKLRCSLAGIQLSATDESKGSKCYVTCMALQAENSSEHSKSSMFNLNTS  
ISSIVADITEKHSYENVNEDTEIRLDVEPEIRDSVGDTKAAAAETVDVRRSLVVSPQLDFLP  
EQQLPENEKEKQPARLRKFRNSKSSTPVRVRSKRLSRHNPEMVTDLNLGERVLQTVVNNS  
ALSGLPMNVSGGESAQQTDLATGDSQPSLSRKASSRNDPLKVVKCLSEGQAFNEQNDE  
RILQDSQPAGISYERGKVHLEQHALNERPTAKLAKEEQDGQNRLNNSQLAESASGRRVF  
PAEDRSVSERSTVEQVSEKRNGEYEQWQYSQLAEPWSRVDLNVENQQWQDVQLAPSH  
RFVDLNMENQQWQDSQVAPSQRSVDLNVENQQWQDSQLPESSHRNLDLNVESQPVKEK  
QTGELVTENQDEQNRLHAQLASYPFGDYWSDPCMEFAFKTLTGALPVEDTLAFQGSTH  
QEYNTSYTQADDGCFELPLFNTSSFYLNDAPNHCAPSEEHVVKEQPALNQTFLLPTGNNSIP  
GHSSVVSQNPGLTFLPNGNNSIPGCSSIVSQNPGLNPQAKDYQSKFKSHR

>StMBD11

MLKKGVRACKNEVVFVAPTGEEIRNKRQLEKYLKTHDGNPGMSEFDWTTGEAPRRSARI  
SQKVKAMPLPAVLEPAKKRQRTSYATKKEEEMDIADIEKENMESAIEEKEGLEKEENIVEV  
EMEDKGGEMGANKENTEHKKEEEMAGTEVSDRKTEASNDIQFEDGGDKMAENVTEETI  
AIDADFWNDSMDKDYFKGVFANAVIGETNGAEAGIEVGEKPGYGENLESQIDIDISGADN  
MNHDIPDKGTPERKVAGGETYNIQDPAFVGEASGFREEPSVVEEKNKNRAGLVMDCNQI

NQPERAHTPQHQS VATISC

>StMBD12

MDQNVSHGVEPVNNMKPPTTPMALVVECARCFKWRYIPTKEKYEEIREHILERPFYCETT  
REWHSNKQCDDPPDLTEDESGLKWAIDTPNIPQPPPGWVERVIKFRTRNTRIADVYYNSP  
SYQQLRSKIEVEKYLEQHPEYATQSAKLDQFSFQIPRLLEEDYVVNGEWYKDREISSINE  
LKWKRKGSKRKKRDEWGTIVLFLKKIQASNEQTVAMTSVS

>StMBD13

MDQNVSHAVEPVNNMKPPTTPGALVVECARCFKWRYIPTKEKYEEIREHILERPFYCETT  
REWHSNKKCDDPPDLTEDESGLKWAIDVPSIPQPPPGYYNSPSNQQLRSKIEVEKYLEQH  
LEDATQSAKLDQFSFQIPRLLEEDYVVNGGMNLY

>StMBD14

MTKADATVSSIPLTVVTSDDFHNDGIPLDPLLPLGSYIDVELDVRVETTTTPNNSDVPNEG  
KVSDVNRSKLQIKRKIIPMCQVNPDRPEWLPNNWTFETIVRTSGASAGQKDSYYFEPVSG  
SKFRSKPEVNHFLKTGLKREKLDPNRDDATPSEGKKQKKSGSKKEKKNVD

>StMBD15

MEPAVAVAGETVQERPSWLPEDWKFKSVVRMGGATAGLTDHYYYEPLSGKRFRSKIAVLD  
FLKTGTRKKGDSETPKAKNKEEDGTSFFFDSANPPESVCWTLTDSNEDTWKPSIDGDMI  
SEMEKQQWDVVFSSVSKLEISNTKNEK

>OsMBD701

MGNSKTPQPSKKSRIMLSDTDGHQLDNDEFSSASNQMVLFNPETVAKGQDELGENHSP  
SLQKSANNPNRGMPSIGAFTVQCAKCFKWRLIPTKEKYEEIRECIIQEPFECERAREWRPD  
VTCNDPEDISQDGSRLWAIDKPNIALPPPGWERQIRIRGEGGTFADVYYTSPTGRKLRLSLV  
EIDRYLLENPDYVAQGVTLTQFSFQIPRLRQDYVKKRPKIVNPNDASVTTKSVKPEEV  
SPIAWAAPSVHQEAGERASHADEPPEAELELTRKRKAESPLFEEAHSNHVSDEPKTKL  
EDTQNGGPSA

>OsMBD703

MRTFQGHNPNTMKVHSRKSQPSKKKPREFYDTVEVHIIDDDSDGDANIHKDYSMEDTSK  
HLVMYNPEITYDKQGEVEVTEPIDNYTSLNQRYMKPRHGYNTVLPSIGAYTVQCAHCFK  
WRIIPTKEKYEEIRENICQDVFCERAREWNRVISCVDPEDISQDGSRVWAIDKASISQTPP  
GWDREVRIRGEGCSKFADVYYTSPTGKKLRLSLVEVGRYLAENPHYIRQGVNLTQFSFATP  
KPLQEDYVRKHTYAATPELPELLETAQVDPLCWAAPPTRSELLGELGASTSRSDVVSQSEV  
SYPVDLHQPEESAPLPPRTKKKTMKRGRVSATGSQSTPPGSSKDQSGGCVSDVEFVSL

>OsMBD704

MAGPSVWKGLGVAGSTSIVISDDEKKEIQQDVEDLEEEERPGWLPDGWIMEVYQGDDG  
TIYRYYTSPISGLTFTMKSEVLQYLFSGMDERFLESKNCAADNQLINNSVYVSPTMTYMQ  
MTHEWLPKGWIIIEVRAGGKNMNKMYKFYVYPPAGVRLFSKEDVLLYINKSEITGFDTN  
ECDTRTKDNILANVEFNPHSLPEGWVKEVFRKTKTGVIKDPYFTDPVNNYSFRTRKSA



MLYVQTGKVPKRAFIQRTSVHDLYSFEKSADLHESLKKRLDFAARTNRKSRRSLKSKNSS  
LTEKSLSDEESSYKYGDSSDDLSDSSSEVKKNKGKLEKTTCKTKKSVSFNTAKRPVGRPSK  
RSTEEMPRDVEIKQESASSEYWC

>OsMBD705

MSTPAGVAPRRSSRLASSAPPLGAGQPSSSPLPRRRRRRASPSGCAREVDNSPPPVVILDDN  
EMEQHVEAEEMKKQGEESVEANEAEKDKDAEVLEELPDWLPDGWIMEVRCGDNGNIY  
RYYTSPVSGYTFSTKMETLHYLFSEMDERVLESQACADDNELHRMHTWLPDGWAIEVRA  
GKKMEKMYKFYVHLPTGMRFLSKENVLLYSNEGKISRCDVKGLCDTSSSEDNILAMVEF  
NPDGLPEGWVKEIIFRKCN DGIRKDPYYTDPVSRHVFR TLKSVINYLETGQITKHAYIPRRS  
VTDMYSFDRCTDLPQSM LKRLKIQGKAKKKS VGASVKGKLSNGLASNNCMSSGLDPEI  
GPEERKLGT VKSITKEAVNSDTIKRSRGRPPKILMPTIESTKPEIALVTSEAIKRSRAEGVNS  
CLIH LSEPNEK MVKATSAVEPASSNNAKR HGGSPQKKFKHITDITL DCAKSSNKESEHIVTA  
KKLGIGGGEQVANENTLEHTNMKEHLGVIQDYTSNRKKDKLNLITD PDLHEHKNGKFTE  
KLACTAVHKFYMRSSNHTVALKKG

>OsMBD706

MYAVQCCECHKWRKVPTKDEFETIRENFTEEPWHCSRRPDCSCEDPADIEYDSSRIWVLD  
KPNIPKPPAGTERLVIMRGDLSKMDTY YVMPNGKRV RCTAEVDKFLEANPQYKDRFSVES  
FSFTTPKIVEETVSHNSVWKS GKAKKQDKINALSNNN

>OsMBD707

MATAGDEQQQAAAAQTAEVTEAAAKEVVSVEMPAPEGWTKKFTPQRGGRFEIVFVSPT  
GEEIKNRQLSQYLKAHPGGPASSEFDWGTGDTPRRSARISEKVKA FDSPEGEKIPKRSRN  
SSGRKGKQEKEATENEEAKDAEADKEAPSEDAPKETDVETKPAEEAKEAPSEDAPKDT  
DVEMKTAEDASKTADADTPAPAPAGTEKEDAKPAESEAAPPAPSEGGEKKEDAKPAEPEA  
AAAPPSNPTEPSAPKAAAAAPVENSADKGPHQDSQPPSAAAPAKESSPVNNGQLPAGASA  
VKCT

>OsMBD708

MGTEVAPMVDMRALSQSDLVALAAGSPYSADPRRGRDADVLPPPKIDRAVFNESAGSRK  
QTFSRHRVATNL SHSLTPATASAAAAPAPAPADESENRLIAFHLQRLFAGEDPSFASPPQIA  
PQPQPQTLITPAIAAAVTPAPSLPTPPPSNADMEVMNPNGVAVDLARLAELVDPYEEEMRR  
RTAGLGAESSELLGFMNGLEGQWGSRRRRRK FVDASMFGDHLPRGWKLLLGLKRKERRVA  
WINCRRYVSPSGHQFATCKEVSTYLSLLGYVEAKPTAIQSSDAEVLELNAVNSVGHCQP  
NSTEEKQSAPPVTSVPFSSHGDPQRQLDKNETQVEANGKECQKCNLTFQDQSAYVQHQ  
LSFHQRKAKRRKV NKSGEVGANKNVTIVTQECHITSEDKLG NIDHSLATTKSQGQTPEKM  
PDETISGELGGRPSMAPEPVGFQETNGLTEQGKESSAGELLSGHCDPLHN MAGVPEKEKG  
SAGEPVTGNHEDPIDNFS DHKIHDGACHNAEEPHAVEAASEFNIGNSANLQQTDSTKDLV  
LSNADCTQNDNITKDLAPNPTIPQGESKCIDDPMECTDMKPSKKVSEPCDLLDDKFSSFPE  
GANFNGQEENSPLSAALNEPDLNSIDMEVDNDNVECKYGNAGDSTSPENGKHIEDQIIDC  
RMTALKDHEINTDV RIRDVNLNSCLDAMSPPVSGANYETSNAIDDNNRSSIIAQCFGANSA  
DDNACKEE NFVNNQSSVSKAESFNQNNDMIYQPNLTMDPISPAQINVDCFTSCSMTSEIKN  
NSNRREDNAKEQLVNPRNITSNDAGFDVEAYS NIFNGAITESSLAQLNNAINMKADYSSC

YSLSDLNTLTGGPATDEIDIHSMRNSFVNSSTSRNEPNEHCTLDFDIKGSMLEALEKSDSDL  
ENQYNGSTRPCGSLPTAGTSGSIDDFMSLQTNFGSLTSLVRSVEDGPMSRIIQDQCQLGLF  
GVQKPQMYPTFEEQLRMASAGAPQFGTMNRHNHVPVPEPTLMLGYAPHIGSCPPVQLG  
WDMSMSKMGVGGCVLQSSMCVWCNTQFQHFQTVADQQADSLGFICPACKEKISGHL SML  
NNSSSQL

>OsMBD709

METEVPVVDLRVLSQSDLEALAAASAHAVAPGGSCPDADQLPPLKIDRAVFNESAGSRK  
QTFSRVRFGAAAABAASPPSPSAAAKLPRGNDKEDSFIAYHLRRLFAPDDPSSPQIQTALA  
LPAPPSPDPDQLTTNSKGVSVDLVLSRLADPYDAELGKRTAGMTTEEELMGFISSLAGQW  
VSQRMRRKLVDASFFGDHLP SGWRLQLGIKRKDRKAWVNCFSYVSPKGQSFATCQEVSA  
YLMSLLGYPEFKTDNIEYGSTQQHGLCADDGVNVLVGVQHQIGTGMDSQSILPVASITFSSH  
SRDQDET DADDINSYECQQCNLTFHGQSAYAHHLITFHKMGSKRRKINKVGKFGPEVIGK  
DGKFECPCVNCNKFEEQSRYFGHVGSYAHYHGLTPEAFLQTL SGKVGND SFAGLSCSLQDL  
VGSPQLNEKTTASEARSQHHCNSTKHGGNSTRGIDLFNSNCPANFNNGHNQTWCRPDEIPP  
TTDAPSTWTYRNNVTNCADRTVPRTAPQPNHMDCRVSGFAEATNFNDQAGR HQGFRPS  
SFGTTNHCQGGIIDHAVAASKHAEVNNSMKS RDVNLSRLNTISFPIATANNETSTALNDV  
NRSCITGKGFSGSFSNNDGAASIVLPSSGLNNKIPSSLG VADRSSIAARSFNAGYVNENGAS  
EANNIGNKNNTMVYQTS LAMRPVSPCDLQLGFSGQKQQLPGYGELRPAASGSPQLGGM  
AANSSIPTSPSPQFGSMARTDALPTGPSQPGSLARPNFVPTGFSQFASRPPTSVP PADSSQF  
AGGMARQNIPTTSEPTLVLYTPQM VNGPPAQLGWDLSLRMVSEGMLPVLCIWCNSQF  
HHFGPIDAQQSGSFGFICPACKEKMSGNP NAPNNGPWQP

>OsMBD710

MVSRPLDFRTIDIRLAMGAYYG SWEAFLEDVQEVIRNLHTAFGDRPDVLEMVVALSQSFE  
SLYKTEVLDLVEKFDKYLSDKNAGSEMHEELHDILTAANSLPKAPWEDGVCKVCIGDRD  
DDSVLLCDKCDSEYHTYCLNPPLARIPEGNWYCPSCMLGQTKAHDQGVQDVKRQKKK  
FVGEEAHAFQEELNKLATAMEEKEYWDLNMQERIYLLKFLCDEMLNTALIREHLDQCS  
KLGDLLQKFRA SNFELKDLKYKEEMRTSYARQSRSSKTEQHFNNSSGPVENQQQCTPTAL  
DHLEAEAQGNVGVNLNNPADGVDPDQQLNVGKPKYKSDKDISSASMVEERKSSGLSEQPSG  
MAIDQIDGDAIDEGSQSCEKRS LGAKSSTCDNLNLKDETFSTPGREL PDERASTSFQDNLE  
ASSTKSIELDADNNEMDTLSDDISKLQDSISLLESQINMASSRRECLGKDSIGRLYWVIGRP  
GKRPWL VADGSMLKPKERDISMVNSYPPSAFDCKGWN SASIFIYESDEEIQCLLDWLRDY  
DPREKELKDSILQWQRHFCHQSSSPLVDPPISGPKGEQLMELPNTKAAVILEQKYGLQLDQ  
DTS DLPKKRGKKIKLSS EDRYRCDCLEPVWPSRYHCLTCHETYLISTEFEGHNDGKCSKI  
HQSPDESRENDEPKVKVTKSDTKEKDSLECSSVIEPSSDRKLMQCPYDFEEICRK FVTNDS  
NKETVKQIGLNGSNGVPSFVPSPAFFLEPAIVQSQNRKDDELKDWTSSLEECNAMS AQKL  
VQEVSKSGQSCPGNVGDEKVQKSKKPTPDNTSGEEAHSTTGKPTRLLAVNGGLVPESSLR  
PLIGRNSHILKQQKINLLDIEAALPEEALRASKCQQIRRRSWRA FVKDAESISQMVLAANL  
LEGMIAEFLKNDWWYWS SFTAAMKTSTVSSLALRVYTLDDCIIYSKDQVPSVEPADNTR  
SGNRGGRRRRELESLAS

>OsMBD711

MALEGKPGFITMYAITCCKCEKWRTIPTKEEFEVIRENYP AKPWFC SKKRDCSCEHPEDIQ

YDTSRIWAIDRPNIPKPPKTERLLIMRNDLSKMDAYYVLPNGKRAKGKPDIDRFLKENPE  
YAATLPLSSFNFSTPKIVKETVSDSAKWVMAKSEREEQCMQLDAKEVPSSSSK

>OsMBD713

MGKSPSFGILDDNDCDEVKSSDESTKNLQSDDDDDVDDRQYYICPVSGRTFTMKSEVLHYL  
FSEMDQCFTESKNRAVGSNLTRTHEWLPKGWLVEIRAGGDNMDKMYKFYVYPPNRVRLF  
SKDDVLLYIKEMKISGFDTDGQCNTSTQENILAILEFNPEGLPQGWVKEVVFRKTHTGRI  
RDRHYTDPIKSYVFRTRKSAAFYVETGKVTIRAFVQKTSVHEHESLQKRLNLGRTNQLRT  
RSSKLQKLSLKEGILSDDQSSSSAARCRQQPEWVWVSFSFRFSVDRFPVSGALSYLGSAD  
VVSTLWRGGSTAGDGLLVFCAVVAWRELLWWRYWWWRVWVELATQS

>OsMBD714

MGKSPSFGILDDNDCDEVESSEEATKNLQSDDDDDVDDRPGWLPDGWIMEVYRGDNGTIY  
QYYICPVSGSTFTMKSEVLHYLFSEMDQRFMESKNCAVGCNLMRTHEWLPKGWLVEIRA  
GGDNMDKMYKFYVYPPHRVRLYSKDDVLLYIKEMKISGFDTDGQCNTSTQENILAILEFN  
PKGLPQGWVKEVVFRKTNTGGIRDRHYTDPIKNYVFRTRMSAALYVETGKVTIRAFVQ  
KTSVHEVYSFEKFTHLVIVLQNFHFMVLVLLWIK

>OsMBD715

METEVPFVVDLRVLTQSDLDELAAASAHAVDPRSSCPDRAVFNESAGSRKQTFSRVRFVPA  
AAAAAAAASASAAAAAACLPRGNDKEDSFIAYHLRRLFAPDDPSLIENPSFPQTQTLARSPS  
PDPDQLTTNSRGVSVDLVSLRLADPYDAELGKRTARMTTEEELMGFISSLAGQWVNQR  
MRRKLVDASFFGDHLPSPGWRLQLGIERKDRKAWVNCFSYVSPKGQSFATCQEVSAYLMS  
LLGYPEFKTDNIEYGSTQQHGLCADDGVNVLVGVQHQIGTSMDSQSNLPVASATFYSHSRD  
QDETVADDINSYECQQCNLTFHGQSAYAHHLITFHKVSSKRRKSNKVSKFGEPVIGKDQKFK  
ECPVCNKTFEEQSRFYFGHIGSHAKYQGLTPEAFLQTFSGKVGNNNSFAGLSSSLQVLVGSPQ  
LNEKTTACEARSQHHDLCSTKHGGNSTRGIDLFNSNHPANFNHGNQSWCRSDEIPPTTEAQ  
STWTYRNNEMNCADRTVPRTVPQPNHDHEDCRVSGFAEATNFNDQAGRHHQGFPRPFSFGTT  
NHCQGQIIDHAVAASKHAEVNNSMKSRDVNLNSRLNTISFPIATANNETSTALNDVNRSCI  
TGKGFSGSFSNNNDGAASIVLPSSGLNNKISSSLGVADRSSIAARSFNAGYVYENGASEANNI  
GNKNNTMVYQTSLAMRPLSPGKQSSGVASRRTAAVVSERHGGQVVRHPRTASSVYMPEQ  
GPGWL

>OsMBD717

MDYSNSSCSRTCSGLVRLNNTIESNEVLFSKTRSGLVRLNSTVESNEVSLSKTRSGLIRGNT  
NVRSEGSYSTTRSELAGANGVVDSDNVGDLCSKTRSGLVRRNATLDSNEGSCSKTRSGLA  
RGDGIVGLNQGSSSKTRSGLVRRGDDIMNFSEGSSSKTRSGLVRRGNTTVAASNGSYSATPSR  
FVRGNIIVGSKEGSCSRTRSGLVRESIQMDYSDSSCSRTSGLVRRKPFMVQVKDEAAMN  
GLSDDCLKEDSPGKNEPNHKSNLVENS DKPVMKGPDGWWKEGMLTKNGSKYMSDPVQ  
TKGEACINGLPGGQWKENSAEKNVSNHKNELVQRKDDLIVDGLPDGWWKEDRPRKNGS  
NLKTDPPYIDPVSGYEFRLKDVHRFLKSGDIYKCVIRPRKRRTIQDPCTIENQSHTATLLQH  
TRPGTADKAIQCELLTSEGLMLPWEEQLSPYRELNNPKKMPELEGMIASQKHAYKVDAPR  
EKKSFPKRKQPSAGGPKKHKIVPAKMVAMPVRASPRLASLKITHDLNTEPEDELIGVN  
LVNEVQSTKENPTDKSRLNQAGISTEMTSVQERADNQLLSSQADTGNHIRVMEGDTTSS

QLRQADTVNQILTDQENAVSQLQSSHTDYFVQIRPRQEYVTNYSQSLSRAATVNQIETN  
QRNMSGQLQSSQADSLDQIQTEQESSASRLQSSQADSFNEIHTIQEYITEQSESQVSHANQI  
QIDLGNTVDLLPSSQADAIQMETTTQEYITNQSQRQADIVDHMQVNQDNTANQFHRLRQA  
DTVNRIQTMQESTTDQPQLIQALTVNQIQVNGENTANHVQSRQADTVNHIQLNQDNTVN  
QFQLRRADTVNRIQTMQDSTADQPHLIQALTVDQIHANRENVVNHVFQSRQADTVNHIQVI  
QDNTANQFQFRRADTVNKIQTMQDSTTDQPRFIQALTVNQIQANGENTANYLQPNYAEN  
NIMQVGFSLTPEPEEAPATSFWRNVANQELPVSMQTDGKPVVSSALNVEYQNPATAPAQ  
TRAPHPEAASYPSGLAVPSLFGNSWSDPCIEFAFKTLRGDIPVLDDTSAVEQYFPQHDLNKP  
PSPDYSASPSCFSSSFNTRNFTQVDHASLPAPNPSDKLYNGGWFPFK

>OsMBD718

MDYSNSSCSRTCGLVRLNNTIESNEVLFSKTRSGLVRLNSTVESNEVSLKTRSGLRGNT  
NVRSEGSYSTTRSELAGANGVVDSDNVGDLCSKTRSGLVRRNATLDSNEGSCSKTRSGLA  
RGDGIVGLNQSSSKTRSGLVRGDIMNFSEGSSSKTRSGLVRGNTTVAASNGSYSATPSR  
FVRGNIIVGSKEGSCSRTRSGLVRESIQMDYSDSSCSRTRSGLVRRKPFMVQVKDEAAMN  
GLSDDCLKEDSPGKNEPNHKS NLVENS DKPVMKGPDGWWKEGMLTKNGSKYMSDPVQ  
TKGEACINGLPGGQWKENSAEKNVSNHKNELVQRKDDLIVDGLPDGWWKEDRPRKNGS  
NLKTDPPYYIDPVSGYEFRLKDVHRFLKSGDIYKCIVRPRKRTIQDPCTIENQSHVSSLQFF  
LV

>TaMBD1

MASPAPVPASPGSSSQKKRGATESIGLYAVQCCECHKWRTVSTKDEFETIRENFTEDPWSCS  
KRPECSCEDPPDIEYDSSRIWVIDKPNIPKPPKTERLVIMRGDLSKMDIYYVLPNGKRARG  
IGDVQKFLDTNPEYKDRISAESFSFTVPKIVEKTVSQSSLWKTAKKQDKINASSSKKDK  
ANASSEN

>TaMBD2

MDSSKSPQPLKKSRTSLSGTDGHQFENDELPSSETASDKTPGLKFETVDKVQDEFGEDESPL  
QQSAASNVSYRGSPCIGAFTIQCARCFKWRLIPTKEKYEEIREHIIQEPFDCERAREWKPDV  
TCDDQEDISQDGSRLWAIDKPNIAQPPAGWERQIRIRGGGGTKFADVYYTSPTSRLRLSLV  
EVDRYLQENPEYGAQGVTLAQFSFQIPRLRQNYVKKRPKNASPSDEATTKPVQPVEVNPI  
SWAAPLASEAKASEPASHADEKPVGSADVELVRKRKAEPGEANANNHVSDGPETKVEDA  
QNGDATTTA

>TaMBD3

MVETKREPAGEGLPDGWLKEYRPRKPRPGSRFRDCKFYIDPTNSYEFRLKEAHHYLESQ  
DTSDSVVTPKKKKIEDLQVSGNKSQHAGRPSSEPEGVSKGRLADLELQVARKNDQRLNH  
ESAAREEANVEPKPKGKKQKTEPVKQIAAPVRSSPRLTALKRNEEANMYLETHLWTTDRY  
R

>TaMBD4

MDKPGIPRPPATKRLVIMRRDLKMDTYLLPNGKRARSGNDVEKFLQENPEYRANLPA  
SKFSFATPKIVPATIGESSLWRVAQAEGEKFEEMDVFGF

>TaMBD5

MDKAGIPCPPPVTERLVIMRRDLSKMDTYLLPNGKRVRSGGDVEKFLQENPEYRVNLPA  
SKFSFAMPKTVPATVVESLRRVAKAEGKV

>TaMBD6

MATGGDRAAEELVSVEMPAPEGWTKKFTPQSRGRSEIVFVSPTGEEIKNKRQLNSYKAN  
PGGPTSSEFDWSTGDTPRRSARISEKVKVFDSPEGEKIPKRSRNSSGRKGKQEKKEPETE  
EDKEAEAGTEAPSEDVAKGTDVEMTIAEAIDAAKSTDVEMKPAEANDAAKNADVEMKV  
AEEVKACS
