# Supplementary material for: Exploration of the Potential Transcriptional Regulatory Mechanisms of DNA Methyltransferases and MBD Genes in Petunia Anther Development and Multi-Stress Responses
Source: MDPI journal article supplement (doi:10.3390/genes13020314), 2022-02-08
Supplement: s1 [file s1]

**Table S1. Sequences of C5-MTase proteins in the 15 tested species.**

>SmelMET1

MGSLPALDKPDTDAGYKKNKTKQDSQSKRKTSATDKKEKKQPVSEIEELTAARKRPKRA  
AACSDFKEKSLPLSKTSSVIETRKDHCVEEEDVAIRLTAGLQESQRPCRRLTDFVFHNSEGI  
PQPFEMSEVDDLFIISGLILPLEDSLDEKAKGIRCEGFGRIEWAISGYEDGTPVIWISTETA  
DYDCVKPSGSYKKFYDHFALAKAMACVEVYKKLSKSSGGNPNLSLDELLAGVVRAMNGI  
KCFSGGVSIRDFVVTQGRFIYNQLIGLDETSKKTQDLFVELPVLASLRDESSKLETLAQPEP  
ISFGKALHIGPKAVNGEDKIDESGLANCAASEDEDLKLAKLLHEEEYWRSLKQKKGRNTS  
SSSSKIYIKINEDEIASDYPLPAYKTSNEETDEYIVFDSGVDYHIDELPRSM LHNWALYNS  
DSRLISLELLPMKACADIDVTIFGSGVMTADDGSGYNFDT DANHSSSCGRPAEIDGMPIY  
LSAIKEWMIEFGSSMIFISIRTDMAWYRLGKPSKQYAPWYEPVIKTARLAVSIITLLKEQSRV  
ARLSFGDVIKRISEFKKDRPAYISSNVDVVERYVVVHGQIILQQFSEFPDVSIRNCAFAIGLS  
RKMEERHHTKWLIKKKKVMQRHEQNLNPRASMAPSVKRKAMQATTTRLINRIWGEYY  
NYSPEVSKEVVDCEVNDDEEADDEQEEENEEDDVPEMNLDVPEKTHTLSSARKHIKSHSDS  
KEINWDGESTGKTASGELLFERARVHGHEIAVGDSVLVEHDEPDELPSIYFVEYMFELKLDG  
SKMLHGRMMQRGSDTVLGNAANEREVFLINECMDLQLGDIKESIAVNIRIMPWGHQHRN  
TNADKLDRAKAEDRKRKGLPTEFYCKSFYRPERGAFFRLPFDKMGLGNGLCYSCELQRT  
DQEKESFKFDMSNSSFVYLGTEYSVDDFVYVSPDHFTEERGGTGTFKAGRNVGLMAYVV  
CQLEIVGPKGSKQAKVDSTNAKVRFFRPEDISSDKAYSSDIREIYYSEEIHTVSVGTIKG  
KCEVRKKYDISSEDVPAIFDHNFFCEYLYDPSNGSLKKLPAQIKLKFSKVKLDDATSRKRK  
GKGKEGEDEAGGLNEASPQNRLATLDIFAGCGGLSEGLQHSGVTDTKWAIEYEPAADAF  
RLNHPKTKVFIHNCNVILRAVMQKCGSDDCISTPEASELAAAMDENELNSLPLPGQVDFI  
NGGPPCQGFSGMNRFNQSTWSKVQCEMILAFLSFADYYRPKFFLLENVRNFVSFNQKQTF  
RLSVASLLEMGYQVRFGILEAGAFGVPQSRKRAFIWAASPEEVLPEWPEPMHVFSVPKELI  
TLSETSHYAAVRSTASGAPFRSLTVRDTIGDLPVVGNGACKTCIEYQGDVSWFQKKIRGS  
SITLSDHISKEMNELNLIRCQRIPKRPGADWRDLQDEKVKLSNGQLVDLIPWCLPNTAKRH  
NQWKGLFGRLDWDGNFPTSITDPQPMGKVGMCFHPEQDRIVTVRECARSQGFSDSYQFA  
GNILQKHRQIGNAVPPPLAYALGRKLKEAVESKKLT

>SmelDNMT2

MELEGRSPWRVLEFYSGIGGLRYSLLKAAVNATVVEAFDINDVANDVYQHNFAHRPFQ  
NIQTLTAADLDGYNADAWLLSPPCQPYTRQGLQKGSSDARASSFLKILELVPQLLQPPSY  
LFVENVVGFEVSDTHAILVEILKKNFVTQE FILSPLQFGLPYSRPRYYCLPPDFGVMVR  
RQCVMYRLSVHVKFEHLGRPKEAEKGSVLVALSILSFENMHVLSYPYAKRKPLSFEP  
FNNQLLRTPGPLLQGTESTMEKEQLLSPEYWDELLQACQPVDLFLVKTFHNGKDSSTYS  
FHSNDSVKSRSDEENNVYFVPSSLIERWGSAMDIVYPHRSKRCCCFTKSYRYVKGTGSL  
LASVQTLFSRNHFFVYFEELPKIGAIPAMACISHPSDNIIYYNAGFKSYKITRTAGTES  
WFEWTEYSRNLMRKVQISLKV LKWLVSVLIEASKCRGNIKRWSLKDHFEEFYGT LKYN  
SGRYVSFIAIQGKNRSIIITSKPSHGGGWSNIAHKIAGFIYETNCRTEEKNYGGRKANMS  
YKQAVQRSRWSTEKVKTTDLQGIDTHIDVTNGATLGKSELLSRCLVRTVLKSTARKPNP

>SmelCMT3a

MSTKRKASPAESPESKRHAVTENADQVVEEPTEDFLVECFVDEETVFDGLNDGSHA  
RRVVQVNEEQEGVFSGETVRDSEAREKWPHRYI IKDKVKANGTPMSLNCQDGSNQLIQA  
KCHYTQAMVDSQIYKLGDDAYVKAADGEDDYICKIVEFFQAVDDMKYFTAQWFYRAKD

TVIKAHDQFIDNKRVLSEIKDDNPLDCLVSLQFKESLRSNSDYYYDMKYLVPFSSFVSLSS  
DFRDSAVFADVSSPYSESDSTISTDGDVVEANEQKQEKKLLDLYSGCGGMSTGLCLGADV  
CGVKLVTKWTVDLNRYACDSLKVNHHPETEVRNESASDYLLLLKEWEQLCASCSSLKSNT  
PAHPLLKVGDEDEEDDDDDGGDEDEGSGDNEEGEIFEVEEILEVCYGDPNEIKKPGLYFKVR  
WKGYPDEDTWEPIEGLEYEFQTKQHVVNPCFSFLTHLSNELIFAYSGCQKKIKDFVIKGF  
QASLFPLPGEVDVICGGPPCQGISGFNRFRNSANPLQDPKNKQLEVFMGIVEFLKPRFVLM  
ENVVDLLRFANGYLGRYALSRLVGMNYQARMGMMVAGAYGLPQFRMRVFMWGALPSE  
KLPQYPLPTHNVIVRGGIPTEFELNAVEYEEGLQVKLKRELLLEDALSDLPPVENNEPRDE  
MPYTGEPKSDFQC FIRSKRDGTLGTVLYDHRPLQLNDDDYQ RVCQIPKRKGGNFRDLPGV  
RVRADNIVEWDPDVERVKLTSGKPLVPDYAMTFVRGTSQKPFGRLLWWDEIVSTVVTRAEP  
HNQAILHPVQDRVLTIRENARLQGFPDYKLTGPIKERYIQVGNAVAVPVARALGYSLALA  
LKGLSGDQPLLTLPNFPRLLEELVSNEEALDKL

>SmelCMT2

METELNNSSKISENQTPSPEKTTPISSSSPNPDALALSFSLNEEPVLVVCYPGRRRSSRFST  
NKFSTSELMKKNRKCISPEKEVLLPSALAGKKTPAESTRRSPRLVSPSATGKVKGKGNVN  
SRKQVESSRKRKYKNNDDEPENPKTDGKKRRSDSVSAKLELLALPEADGAWGTRCGTKR  
ELLALLTPEGSKNSKRGRSGSDSGNVGHDSRGSRRKNLVLAAASPGTSEKKSDDVNVSGEK  
SLRSRRIQGSVDNEESDTKRKMNSSDSAEESGRKQKSNVFFIGEPIDAEAAQEKWQWRYE  
LKSQNTQRKGWKLNSGEEDEIILNVECHYAQAKVAGFVFNIGDCAFVKGEGKKKHIGRIL  
EFFKTTEGEDYFRVQWYFRAEDTVLKGAASFHDPKRIFYSTLENDNLLDCIVSKVNVIELP  
TAHALNKKDVPPAHFYDMEYCVDYSTFRTLHNKSSISPSLVDAZYKPITTYPLEVSPSC  
EPMKVELSLLDLYAGCGGMSTGLCLGTLKSGVNLVTKWAVDFNKSACDSLKLNHPQTHV  
RNEGVENFLELLKRWEKLIELYGCSDIKTSSNDAVDDRDEGEINGDSLGSASSGEYEV  
RLVDICYGDPNNDKSGLHFKVRWKGYGPSEDTWEPIDNLENCGESIKDFVRRGQQLKIL  
PLPGDVMICGGPPCQGISGYNRHRNVDDPLSDEKNRQIIVFMDVVEFLRPKYVLMENVA  
DILRFDKASLGRYALSRLVHMKYQARLGTMAAGCYGLPQFRLRVFFWGALPSERLPPFPL  
PSHDVIVKYWPSPEFERNTVAYEEGQPRDLEEALVLRDAISDLPAVTWHETREEMPYEMPP  
ETAFQKYIRLSKHEIMSCSSTGVKEAKEPVLFDRPCQLNEDDYFRVCLVPHRKGANFRD  
LPGVIVGGDNVARRDTKDPKVLPNGKPMVPDCAFNFEQGKSKRPFGRLLWWDET VATLVT  
FPNHRAQAILHPEQDRVLT VREYARLQGFPDFYRFTGTPKERYCQVGNAVAVPVGRALGY  
ALGLAYQRLAGNEPLIKLPPNFSFLTVPMDDIVVLQK

>SmelCMT3b

MPSKRKASPATKPESSSGSRKSKRLAVEKPDVVAQPSDSDFESAPPVLSAKKKSTRGTTA  
ESPVVASQSVSNDKKLNKRVEKAESGVASPADTDFVSEPNLVTPGKRSGRGA AVKAEPV  
VDSAAESDFVDEEDVDET VQGSLLKKSLSISPSKRKPKRAEKVKDEECTLP GDPVPDAEAR  
LKWPHRYNKGKANGTKNTNGQDDSDQLIAKCHFGRKVDGQVYYLEDDAHVKAAD  
GDDDYICKIVEFFEAVDGTQYFRAQWFYRAKDTVIKSHDQFIDNKRVLSEIKDDNPIDCL  
VTKLKIVPVPSNATLQFKENVKSNCDFYYDMKYLLPYSSFISLPPDTTSPVSSSSTISSDVD  
AGEVKEHNPEKKLLDLYSGCGAMSTGLCLGANSNGVKLVTKWAVDLNKHACDSLRLNH  
PETQVRNEYASDFLSLLKEWVQLCVSCSLIKGSVPPHPLKVTDEVEEDEENDEGEDSG  
DDKDGENFEVEELLEVCYGDPKEINKSGLYFKVHWKGYGPEEDTWEPIDGLSDCPKKIKE  
FVVKGFKANLLPLPGDVDVCGGPPCQGISGFNRFRNKENPMQDPKNKQLDVYMDIVDF

LKPRFVLMENVVDLVKFSNGFLGRYALSRLVGMNYQARMGMMAAGAYGLPQFRMRVF  
MFGALSSEKLPQYPLPTHKVIVRGVIPTEFESNTVAYDEGRDFELKKELFLGDALSDLPSVE  
NNEPRDEMPYADEPKSDFQHFIRLGRDGVLGSVLYDHRPLQLNDDDDYQRVCCQIPKRKGA  
NFRDLPGVRVRPDKKVEWDPDVERVKLPSGKPLVPDYAMSFVGGSSSKPFGRLWWDETV  
PTVVTRAEPHNQTIHPLQDRVLTIRENARLQGFPDYKLGPIKERYMQVGNVAVPVARA  
LGYSLAMSMKGLSGETPLFSLPQNFPFHEEQNCNEVSQ

>SmelDRM2

MDKNLSEEDSDNIDWDTEDELEIQDTTFSSCRDLRTTGQYAITGDGEASSSSASGQSKFIQ  
KFVVMGFPEESIAKAIEQNGENSDLVLDALLTLKAIEDSPREEQPSASPHLEPCINSDDSSSEY  
NENFLDDVYEEDSWSSSDFCLNSAKQCYLKEESSLSEKEQTLLFLQNMGYPVVEVSIA  
MERCPEASVAELTDFICAAQMARAEOPYLPEDVKPKINGNGGFKRKMFNQLCKSKKP  
RAIFDEETIRLPKMIGFGVPTPEVSAIVHRTLPEQAVGPPFFYYENVALAPKGVWDTISRFL  
YDIEPEFVDSKYFCAAARKRGYIHNLPINRFPLPLPPRTINEALPLTKKWWPSWDPRTKL  
NCLQTAIGSARLTDRIRKAVEAFDGEPPMRVQKYVLDQCRKWNLVWVGRNKAAPLEPDE  
FEMLLGFKNHTRGGGISRTDRYKSLGNSFQVDTVAYHLSVLKDRFPNGMNVLSLFSGIG  
GAEVALYRLGIQLNNVVSVEKSEVNINRVSWEQTNQRGNLIDFEDVQQLNGDRLEQLI  
DSFGGFDLLIGGSPCNNLAGSNRVS RDGLEGKESSLFYDYVRILDLVKSIMARQR

>SmelDRM3

MCEYSDGENSSKPEGVSGIMPKLEDPFGEFPSLYTYTTPIGANIASSSSSNVRSSLLTMGFE  
ASLVDKAIEENGEDNIDLLLETLIANS DPPRAESSDSLDFGDDDETNSAKYDGDVHIK  
EEDPCIGVCDDKRVSLLAMSFSLNEVEFAIGKLGEAAPVNELVDVIFAARIAGNHKKDDD  
DDVSVVEIKESKKECTTEALFGTMEKTLKLEMGFSDNEVSKVIEKFGSEVPLEELANLIV  
DPSSGRRMNKHLLNPLGRNSSIGFHPVAVKKEEYSLDTSESREIDLLEKLKGKRPQESYIDE  
RDTFKRPKSEYDEAFNNSLGPDWKEILGINNIRPKVCRRAIQQKSRVLDQCQKQLSMPN  
PCRSCLKMVAKAPYFFYGNVMNLSHDSWVRISQFLYSIEPEFVHTQLFSALSKEGYVHN  
LPTENRFHIVPKPPMTIREAVPNSKKWWPSWDTRQHLNCINSETSVVSQICDRLERIVSESQ  
GFPSVDRQRDILYQSQIFNLVWVGRYKLAAGPEQIEHILGYPENHTRLTGTSLMERLLSL  
KHCFQIDTLAYCLSTLKHLYPGGLTVLSIYSGIGGAEVALHRLGIRLKAVVSIESSEENRRIL  
KQWWSSSGQTGELVQMEDIHKLASNKVELLIKNYGGFDFIICQNPCTYSSKGNLAADIDS  
HASLDFMLFHEFVRVMQVRVSTMGRN

>AtCMT1

MAARNKQKKRAEPESDLCFAGKPMSSVESTIRWPHRYQSKKTKLQAPTKKPANKGGKK  
EDEEIKQAKCHFDKALVDGVLINLNDVYVTGLPGKLKFIKVIELFEADDGVPCYCRFR  
WYYRPEDTLIERFSLVQPKRVFLSNDENDNPLTCIWSKVNIKVPLPKITSRIEQRVIPPCD  
YYYDMKYEVPLYNFTSADDGSDASSLSLSDSALNCFENLHKDEKFLDLYS GCGAMSTG  
FCMGASISGVKLITKWSVDINKFACDSLKLNHPETEVRNEAAEDFLALLKEWKRLCEKFS  
LVSSSTEPVESISELEDEEVEENDDIDEASTGAELEPGEFVEKFLGIMFGDPQGTGEKTLQL  
MVRWKGYNSSYDTWEPYSGLGNCCKELKEYVIDGFKSHLLPLPGTVYTVCGPPCQGIS  
GYNRYRNNEAPLEDQKNQQLLVFLDIIDFLKPNYVLMENVVDLLRFSKGFLARHAVASFV  
AMNYQTRLGMMMAAGSYGLPQLRN RVFLWAAQPSEKLPPYPLPTHEVAKKFNTPKFKDL  
QVGRIQMEFLKLDNALTLADAISDLPPVTNYVANDVMDYNDAAAPKTEFENFISLKRSETL

LPAFGGDPTRRLFDHQPLVLGDDDLERSYIPKQKGANYRDMPGVLVHNNKAEINPRFRA  
KLKSGKNVVPAYAISFIKGSKKPFGRLWGDEIVNTVVTRAEPHNQCVIHPMQNRVLSVR  
ENARLQGFPDCYKLCGTIKEKYIQVGNAVAVPVGVALGYAFGMASQGLTDDEPVIKLPFK  
YPECMQAKDQI

>AtCMT2

MLSPAKCESEEAQAPLDLHSSSRSEPECLSLVLWCPNPEEAAPSSSTRELKLPDNGEMSLRR  
STTLNCNSPEENGGEGRVSQRKSSRGKSQPLLMLTNGCQLRRSPRFRALHANFDNVCSVP  
VTKGGVSQRKFSRGKSQPLLTLTNGCQLRRSPRFRAVDGNFDSVCSVPVTGKFGSRKRKS  
NSALDKKESDSEGLTFKDIAVIAKSLEMEIISECQYKNNVAEGRSRLQDPAKRKVDSDTLL  
YSSINSSKQSLGSNKRMRRSQRFMKGTENEGEENLGKSKGKGMSLASCSFRRSTRLSGTV  
ETGNTETLNRRKDCGPALCGAEQVRGTERLVQISKKDHCCCEAMKKCEGDGLVSSKQELL  
VFPSGCIKKTVNGCRDRTLKGPRSSGLNTDDIHTSSLKISKNDTSNGLTMTTALVEQDAME  
SLLQGKTSACGAADKKGKTREMHVNSTVIYLSDSDEPSSIEYLNQDNLTQVESGSALSSGG  
NEGIVSLDLNNPTKSTKRKGKRVTRTAVQEQNKRSCFFIGEPLSCEEQAQERWRWRYELKE  
RKSRSRQQSEDDKIVANVECHYSQAKVDGHTFSLGDFAYIKGEEEEETHVGQIVEFFK  
TTDGESYFRVQWFYRATDTIMERQATNHDKRRLFYSTVMNDNPVDCLISKVTVLQVSPRV  
GLKPNSIKSDYYFDMEYCVEYSTFQTLRNPKTSENKLECCADVVPTESTESILKKKSFSGE  
LPVLDLYSGCGMSTGLSLGAKISGVDVVTKWAVDQNTAACKSLKLNHPNTQVRNDAA  
GDFLQLLKEWDKLCRYVFNNQRTDTLRSVNSTKETSGSSSSSDDDSDSEEYEVEKLVD  
ICFGDHDKTGKNGLKFKVHWKGYRSDTDWELAEELSNCQDAIREFVTSGFKSKILPLPG  
RVGVICGGPPCQGISGYNRHRNVDSPLNDERNQQIIVFMDIVEYLKPSYVLMENVVDILR  
MDKGSGLGRYALSRLVNMRYQARLGIMTAGCYGLSQFRSRVFMWGAVPNKNLPPFPLPTH  
DVIVRYGLPLEFERNVVAYAEGQPRKLEKALVLKDAISDLPHVSNDDEDREKLPHYESLPKTD  
FQRYIRSTKRDLTGSAIDNCNKRTMLLHDHRPFHINEDDYARVCQIPKRKGANFRDLPGLI  
VRNNTVCRDPSMEPVILPSGKPLVPGYVFTFQQGKSKRPFARLWWDETVPVTLTVPTCHS  
QALLHPEQDRVLTIRESARLQGFPDYFQFCGTIKERYCQIGNAVAVSVSRALGYSLGMAFR  
GLARDEHLIKLPQNFSHSTYPQLQETIPH

>AtCMT3

MAPKRKRPAKDDTTKSIPKPKRAPKRAKTVKEEPVTVVEEGEKHVARFLDEPIPESEAK  
STWPDYKPIEVQPPKASSRKKTKDDEKVEIIRARCHYRRAIVDERQIYELNDDAYVQSGE  
GKDPFICKIEMFEGANGKLYFTARWFYRPSDTVMKEFEILIKKRVFFSEIQDTNELGLLE  
KKLNILMIPLNENTKETIPATENCDFCDMNYFLPYDTFEAIQETMMAISESSTISSDTHR  
EGAAAISEIGECSQETEGHKKATLLDLYSGCGAMSTGLCMGAQLSGLNLVTKWAVDMNA  
HACKSLQHNHPETNVRNMTAEDFLFLLKEWEKLCIHFSLRNSPNSEYANLHGLNNVEDN  
EDVSESENEEDDGEVFTVDKIVGISFGVPKLLKRGLYLVKVRWLNYYDDSHDTWEPIEGLS  
NCRGKIEEFVKLGYSKILPLPGGVDVVCPPCQGISGHNFRNLLDPLEDQKNKQLLV  
YMNIVEYLKPKFVLMENVVDMKMAKGYLARFAVGRLQMNYQVRNGMMAAGAYGL  
AQFRLRFFLWGALPSEIIPQFPLPTHDLVHRGNIVKEFQGNIVAYDEGHTVTKLADKLLKLD  
VISDLPAVANSEKRDEITYDKDPTTPFQKFIRLRKDEASGSQSKSKKHVLYDHHPLNLNI  
NDYERVCQVPKRKGANFRDFPGVIVGPGNVVKLEEGKERVKLESGKTLVPDYALTYVDG  
KSKPFGRLWWDEIVPTVVTRAEPHNQVIHPEQNRVLSIRENARLQGFPDDYKLFPGPPKQ  
KYIQVGNAVAVPAKALGYALGTAFQGLAVGKDPLLTLPFGAFMKPTLPSELA

>AtDRM1

MVMISHIFLISQIQEVEHGDSDDVNWNTDDDELAIDNFQFSPSPVHISATSPNSIQNRISDET  
VASFVEMGFSTQMIARAIEETAGANMEPPMILETLFNYSASTEASSSSKSKVINHFIAMGFP  
EEHVIKAMQEHGDEDVGEITNALLTYAEVDKLRESEDMNININDDDDDDNLYSLSSDDEED  
ELNNSNEDRILQALIKMGYLREDAIAIERCGEDASMEEVVDFICAAQMARQFDEIYAEP  
DKKELMNNNNKKRRITYTETPRKPNTDQLISLPKEMIGFGVPNHPGLMMHRPVPIPIARGP  
PFFYYENVAMTPKGVWAKISSHLYDIVPEFVDSKHFCAAARKRGYIHNLPIQNRFQIQPPQ  
HNTIQEAFPLTKRWWPSWDGRTKLNCLLTCIASSRLTEKIREALERYDGETPLDVQKWVM  
YECKKWNLVWVGKNKLAPLDADEMEKLLGFPRDHTRGGGISTTDTRYKSLGNSFQVDTV  
AYHLSVLKPLFPNGINVLSLFTGIGGGEVALHRLQIKMNVVVSVEISDANRNILRSFWEQT  
NQKGILREFKDVQKLDDNTIERLMDEYGGFDLVIGGSPCNNLAGGNRHHRVGLGGEHSSL  
FFDYCRILEAVRRKARHMRR

>AtDRM2

MVIWNDDDDFLEIDNFQSSPRSSPIHAMQCRVENLAGVAVTTSSLSSPTETTDLVQMGFS  
DEVFATLFDMGFPVEMISRAIKETGPNVETSVIIDTISKYSSDCEAGSSKSKAIDHFLAMGF  
DEEKVVKAIQEHGEDNMEAIAANALLSCPEAKKLPAAVEEEDGIDWSSDDDTNYTDMLN  
SDDEKDPNSNENGSKIRSLVKMGFSELEASLAVERCGENVDAELTDFLCAAQMAREFSEF  
YTEHEEQKPRHNIKRRRFESKGEPRSSVDDEPIRLPNPMIGFGVPNEPGLITHRSLPELARG  
PPFFYYENVALTPKGVWETISRHLFEIPPEFVDSKYFCVAARKRGYIHNLPINNRFQIQPPPK  
YTIHDAFPLSKRWWPEWDKRTKLNCLTCTGSAQLTNRIRVALEPYNEEPEPPKHVQRYVI  
DQCKKWNLVWVGKNKAAPLEPDEMESILGFKNHTRGGGMSRTERFKSLGNSFQVDTV  
AYHLSVLKPIFPHGINVLSLFTGIGGGEVALHRLQIKMKLVVSVEISKVNRNILKDFWEQTN  
QTGELIEFSDIQHLTNDTIEGLMEKYGGFDLVIGGSPCNNLAGGNRVSRVGLEGDQSSLFFE  
YCRILEVVRRARMRGS

>AtDRM3

MADMRRRNGSGGSSNHERNEQILFPKPETLDFDLPCDTSFPQQIGDNAASSSGSNVKSLLI  
EMGFCPTLVQKAIDENGQDDFELLEILTKSTETEPGPGSFHGLMEPKPEPDIEYETDRIRIA  
LLTMKFPENLVDFALDRLGKDTPIDEMVDFIVAAQLAEKYAESEDSLDGAEINEEDEDVT  
PVTARGPEVPNEQLFETMDKTLRLLEMGFSDNDEISMAIEKIGTKGQISVLAESIVTGEFPAE  
CHDDLEDIEKKVSAAAPAVNRTCLSKSWRFVGVGAQKEDGGGGSSSGTANIKPDPGIESFP  
FPATDNVGETSRGKRPKDEDENAYPEEYTGYYDDRGRKRLRPEDMGDSSSFMETPWMQDE  
WKDNTYEFPSVMQPRLSQSLGPKVARRPYFFYGQLGELSPSWWSKISGFLFGIHPEHVD  
RLCSALRRTEGYLHNLPTVNRFNLTLPNRLTIQDAMPHMRSWWPQWDIRKHFNSGTCSN  
MKDATLLCERIGRRIAECCKGKPTQQDQTLILRHCHTSNLIWIAPNILSPLEPEHLECIMGYP  
MNHTNIGGGRLAERLKLFDYCFQTDTLGYHLSVLKSMFPQGLTVLSLFSGIGGAIEIALDRL  
GIHLKGVVSVESEGLSRNILKRWWTSGQTGELVQIEEIKSLTAKRLETLMQRFGGFDFVI  
CQNPSTPLDLSKEISNSEACEFDYTLFNEFARVTKRVRDMM

>AtMET1

MVENGAKAARKKRPLPEIQEVEDVPRTRRPRRAAACTSFKEKSIRVCEKSATIEVKKQQI  
VEEEFLALRLTALETVDVEDRPTRRLNDFVLFDSDGVPQPLEMLEIHDIFVSGAILPSDVCTD

KEKEKGVRCTSFGRVEHWSISGYEDGSPVIWISTELADYDCRKPAASYRKVYDYFYEKAR  
ASVAVYKKLSKSSGGDPDIGLEELLA AVVRSMSSGSKYFSSGAAIIDFVISQGDFIYNQLAG  
LDETAKKHESSYVEIPVLVALREKSSKIDKPLQRRNPSNGVRIKEVSQVAESEALTSQDLV  
DGTDDDRRYAILLQDEENRKSMQQPRKNSSSGSASNMFYIKINEDEIANDYPLPSYYKTSE  
EETDELILYDASYEVQSEHLPHRMLHNWALYNSDLRFISLELLPMKQCDDIDVNIFGSGVV  
TDDNGSWISLNDPDSGSQSHDPDGMCIFLSQIKEWMIEFGSDDIISIRTDVAWYRLGKPS  
KLYAPWWKPVLKTARVGISILTFLRVESRVARLSFADVTKRLSGLQANDKAYISSDPLAVER  
YLVVHGQIILQLFAVYPDDNVKRCPFVVG LASKLED RHHTKWIKKKKISL KELNLNPRAG  
MAPVASKRKAMQATTTRLVNRIWGEFYSNYSPEDPLQATAAENGEDEV EEEEGNGEEEEV  
EEEGENGLTEDTVPEPVEVQKPHTPKKIRGSSGKREIKWDGESLGKTSAGEPLYQQALVG  
GEMVAVGGAVTLEVDDPDEMPAIYFVEYMFESTDHCKMLHGRFLQRGSMTVLGNAANE  
RELFLTNECMTTQLKDIKGVASF EIRSRPWGHQYRKKNITADKLDWARALERKV KDL PTE  
YYCKSLYSPERGGFFSLPLSDIGRSSGFCTSKIREDEEK RSTIKLNVSKTGFFINGIEYSVED  
FVYVNPDSIGGLKEGSKTSFKSGRNIGL RAYVVCQ LLEIVPKESRKADLG SFDVKVRRFYR  
PEDVSAEKAYASDIQELYFSQDTVVLPPGALEGKCEVRKKSDMPLSREYPISDHIFFCDLFF  
DTSKGS LKQLPANMKPKFSTIKDDTLRKKKGKGV ESEIESEIVKPVEPPKEIRLATLDIFA  
GCGGLSHGLKKAGVSDAKWAIEYE EPAGQAFKQNHPESTVFVDNCNVILRAIMEKGGDQ  
DDCVSTTEANELAAKLTEEQKSTLPLPGQVDFINGGPPCQGFSGMNRFNQSSWSKVQCE  
MILAFLSFADYFRPRYFLL ENVRTFVSFNKGQTFQLTLASLLEMGYQVRFGILEAGAYGVS  
QSRKRAFIWAAPEEVLPEWPEPMHVFVGP KLIKISLSQGLHYAAVRSTALGAPFRPITVRD  
TIGDLPSVENGDSRTNKEYKEVAVSWFQKEIRGNTIALTDHICKAMNELNLIRCKLIPTRPG  
ADWHDLPKRKVTLS DGRVEEMIPFCLPNTAERHNGWKGLYGRLDWQGNFPTSVTDPQP  
MGKVGMCFHPEQHRILTVRECAR SQGFPSYEFAGNINH KHRQIGNAVPPPLAFALGRKL  
KEALHLKKSPQHQP

>AtMET2a

MEMETKAGKQKKRSVDSDDD VSKERRPKRAAACTNFKEKSLRISDKSETVEAKKEQILA  
EEIVAIQLTSSLESNDDPRPNRRLTDFVLHDSEGVPPVEMLELGDIFIEGVVLPLGDEKKE  
EKGVRFQSFGRVENWNISGYEDGSPVIWISTALADYDCRKPSKKYKKLYDYFFEKACACV  
EVFKSLSKNPDTSLDELLAAVSRSMGSKIFSSGGAIQEFVISQGEFIYNQLAGLDETAKNH  
ETCFVENRVLVSLRDHESNKIHKALS NVALRIDESKVVTS DHLVDGAEDEDVKYAKLIQEE  
EYRKSMERSRNKRSSTTSGGSSRFYIKISEDEIADDYPLPSYYKNTKEETDELVLFEAGYEV  
DTRDLP CRTLHNWTLYNSDSRMISLEVLPMRCAEIDVTVFGSGVVAEDDGSGFCLDDSE  
SSTSTQSNHDHGMNIFLSQIKEWMIEFGAEMIFVTLRTDMAWYRLGKPSKQYAPWFGTV  
MKTVRVGISIFNMLMRESRVAKLSYANVIKRLCGLEENDKAYISSKLLDVERYVVVHGQII  
LQLFEEYPDKDIKRCPFVTS LASKMQDIHHTKWIKKKKKILQKGKNLNPRAGIAPVVS  
RKAMQATTTRLVNRIWGEFYSIYSPEVPSEAINAENVEEEELEEVEEEDENEEDDPEENEL  
EAVEIQNSPTPKKIGISEDMEIKWDGEILGKTSAGEPLYGRAFVGGDVVVVGS AVILEVD  
DQDDTQLICFVEFMFESSNHSKMLHGKLLQRGSETVLGMAANERELFLTNECLTVQLKDI  
KGTVSLEIRSRLWGHQYRKENIDVDKLD RARAEERKTNGLP TDYYCKSLYSPERGGFFSL  
PRNDMGLSGSFCSSCKIRENEEERSKTKLND SKTGFLSNGIEYHNGDFVYVLPNYITKDGL  
KKGSRRTTLKCGRNVGLKAFVVCQLLDVIVLEESRKASKASFQVKLTRFYRPEDISEEKAY  
ASDIQELYYSQDTYILPPEAIQ GKCEVRKKSDMPLCREYPILDHIFCFEVFYDSSTGYLKQF  
PANMKLKFSTIKDETLLREKKGKGVETGTSSGMLMKPDEV PKEKPLATLDIFAGCGGLSH

GLENAGVSTTKWAIEYEYPAGHAFKQNHPEATVFVDN CNVILRAIMEKCGDVDDCVSTV  
EAAELAAKLDENQKSTLPLPGQVDFINGPPCQGFSGMNRFSHGSSWSKVQCEMILAFLSF  
ADYFRPKYFLLENVKKFVTYNKGRTFQLTMASLLEMGYQVRF GILEAGTYGVSQPRKRVI  
IWAASPEEVLPEWPEPMHVFDNPGSKISLPRGLRYDAGCNTKFGAPFRSITVRDTIGDLPPV  
ENGESKINKEYGTT PASWFQKKIRGNMSVLTDHICKGLNELNLIRCKKIPKRP GADWRDL P  
DENVTLSNGLVEKLRPLALSKTAKNHNEWKGLYGRLDWQGNLPISITDPQPMGKVGMC F  
HPEQDRIITVRECARSQGFPDSYEFSGTTKHKHRQIGNAVPPPLAFALGRKLKEALY LKSSL  
QHQS

>AtMET2b

METKVGKQKKRSVDSNDDVSKERRPKRAAACRNFK EKPLRISDKSETVEAKKEQNVVEE  
IVAIQLTSSLESNDDPRPNRRLTDFVLHNSDGVPPQVEMLELGDIFLEGVVLPLGDDKNEE  
KGVRFQSFGRVENWNISGYEDGSPGIWISTALADYDCRK PASKYKKIYDYFFEKACACVE  
VFKSLSKNPDTSLDELLAAVARSMMSGKIFSSGGAIQEFVISQGEFIYNQLAGLDETAKNHE  
TCFVENSVLVSLRDHESSKIHKALSVALRIDESQLVKS DHLVDGAEAEDEVRYAKLIQEEE  
YRISMERSRNKRSSTTSASNKFYIKINEHEIANDYPLPSY YKNTKEETDELLLFEPGYEVD T  
RDLPCRTLHNWALYNDSR MISLEVLPMRPCAEIDVTVF GSGVVAEDDGSGFCLDDSESST  
STQSNVHDGMNIFLSQIKEWMIEFGAEMIFVTLRTDMAWYRLGKPSKQYAPWFETVMKT  
VRVAISIFNMLMRESRVAKLSYANVIKRLCGLEENDKAYI SSKLLDVERYVVVHGQIILQLF  
EEYPD KDIKRCPFVTGLASKMQDIHHTKWIKRKKKILQ KGKNLNPRAGLAHVVTRMKP  
MQATTTTRLVNRIWGEFYSIYSPEVPSEAIHEVEEEEEIEE DEEEDENEEDDIEEEEAVEVQKSHT  
PKKSRGNS EDEMEIKWNGEILGETSDGEPLYGRALVGGETVAVGSAVILEVDDPDETPAIYF  
VEFMFESSDQCKMLHGKLLQRGSETVIGTAANERELFLT NECLTVHLKDIKGTVSLDIRSR  
PWGHQYRKENLVVDKLDRAAEERKANGLPTEYYCKSLY SPERGGFFSLPRNDIGLGS GF  
CSSCKIKEEEEEERSKTKLNISKTGVFSNGIEYYNGDFVY VLPNYITKDGLKKGTSRRTTLKC  
GRNVGLKAFVVCQLLDVIVLEESRKASNASFQVKLTRFYRPEDISEEKAYASDIQELYSH  
DTYILPPEALQ GKCEVRKKNDMPLCREYPILDHIFFCEVFYDSSTGYLKQFPANMKLKFST  
IKDETLLREKKKGKGVETGTSSGILMKPDEVPKEMRLATLDIFAGCGGLSHGLEKAGVSNT  
KWAIEYEYPAGHAFKQNHPEATVFVDN CNVILRAIMEKCGDVDDCVSTVEAAELVAKLDE  
NQKSTLPLPGQADFISGGPPCQGFSGMNRFS DGSWSKVQCEMILAFLSFADYFRPKYFLL E  
NVKKFVTYNKGRTFQLTMASLLEIGYQVRF GILEAGTYGVSQPRKRVIIWAASPEEVLPEW  
PEPMHVFDNPGSKISLPRGLHYD TVRNTKFGAPFRSITVRDTIGDLPLVENGESKINKEYRT  
TPVSWFQKKIRGNMSVLTDHICKGLNELNLIRCKKIPKRP GADWRDL PDENVTLSNGLVE  
KLRPLALSKTAKNHNEWKGLYGRLDWQGNLPISITDPQPMGKVGMC FHPEQDRIITVREC  
ARSQGFPDSYEFSGTTKHKHRQIGNAVPPPLAFALGRKLKEALY LKSSLQHQS

>AtMET3

MKTKAGKQKKRSVDSDDVSRERRPKRATSGTNFK EKS LRFSEKYETVEAKKEQIVGDD  
EKEEKGVRFQSFGRVENWTISGYEDGSPVIWISTVIADYDCRKPSKKYKKLYDYFFEKAC  
ACVEVCKNLSTNPDTSLKELLA AVVRSMNGRKIFSSGGVIQEFVISQGEFIYNQLAGLDET  
SKNHETKFVDNRVLVSLRDESRKIHKA FSVALRIDESKVLTS DQLMDGGEDEDLKYAKL  
LQEEEHMKSMDRSRNKRSSTTSAPNKFYIKINEDEIAHDYPLPSY YKNTKDETDELVL FNA  
GYAVDARNLPCRTLHNWALYN S DMLISLEFLPMKPCADIDVTYLGQIKEWKIDFGEDMIF  
VLLRTDMAWYRLGKPSEQYAPWFEPILKTVRIGTSILALLKNETRMAKLSYTDVIKRLCGL

EENDQAYISSTFFDVERYVIVHGQIILQFLTECPDEYIKRCPFVTGLASKMQDRHHTKWIHK  
KKRKMQLQKGENLNLRRGKAPKVSMMKAMQATTTRLINRIWGEFYISYSPEDPLEEIGAE  
EFEEVEDVEEEDENEEEDTIQKAIEVQKADTLKKIRGSCKEMEIRWEGEILGETCAGEPLY  
GQALVGGRKMDVGGAVILEVDDQGETPLIYFVEYMFESSDNSKKLHGKLLQRGSETVLG  
TAANERELFLTNECLTVQLKDIKGTVSFEIRSRPWGHQYKKEHMAADKLDRARAEERKA  
KDLPIEYYCKSLYSPEKGGFFSLPRSDMGLGSGFCSSCKIRENEEERSKTKLNDKTRFLSN  
GIKYSVGDFVYQIPNYLSKDRGKRRPVFKYGRNVGLRAFVVCQILDIVDLKEPKKGNTTS  
FEVKVRRFYRPDDVSAEEAYASDIQEVYYSEDYILPPEAIKGKCEVMKKTDMPLCREYPI  
LDHVFYFCDRFYDSSNGCLKKLPYNMMLKFSTIKDDTLLREKKTETGSAMLLKPDEVPKG  
KRLATLDIFAGCGGLSYGLEKAGVSDTKWAIEYEEPAQAQAFKQNHPKTTVFVDNCNVILRI  
SWLRLLLINDRAIMEKCGDVDDCISTTEAAELATKLDENQKSTLPLPGQVDFISGGPPCQGF  
SRLNRFSDGWSKNQCQMILAFLSFADYFRPKYFLLENVKTFVSFNEGHTFHLTVASLLEM  
GYQVRFGLEAGAYGISQPRKRAFIWAAAPNEVLPEWPEPMHVFNNPGFKIPLSQGLHYA  
AVQSTKFGAPFRSITVRDAIGDLPPIESGESKINKEEMRGSMTVLTDHICKMNELNLIRCK  
KIPKTPGADWRDLPDEHVNLNNGIVKNIVPNLLNKAADHNGYKGLYGRLDWHGNLPTCI  
TNLQPMGLVGMCFHPDQDRIISVRECARSQGFPDSYKFSGNIKDKHRQVGNVPPPLAFA  
LGRKLKEALHLRNI

>CcCMT3\_like2

MARGKRKSSAANDDASASSSILEKKPKLVEDKNEEISSNVGVVEASAVLDRVSPAKRSGQ  
KLDKPKKEDEEDEDVESRFIGDPVPDDEARQRWPHRYATINNNDINFAKKKAGKSGSLE  
TLKGMAPQKELMQARRHFSEALVDGRVNFKLGDGQYVQAGEGEDSYICRIVEMFEGMD  
CALYFSAQWFYRAKDTIIQACSDLIDDKRVFLSEIKDDNPLDCLLEKLKIVRVPLDADIADK  
QARLADGDYYYDMSYLVYSTYQNLPPVYGKHL SYILV SERLKFLLYEQPITDNDGDGNE  
SDSTISSESDVNGVVSEVPVQVDGKRSEMRMLDLYSGCGAMSTGLCLGANMGDVNLVTR  
WAIDLNRYACESLKLNPETEVNRNESAEDFLMLLKEWEKLCQSFSLVGGGDSQQRMNPAS  
IEEDEGEADDDDDDDSDGLDEEVFEVEKVLICYGDPKEIKKPGLYLKIRWKGYGPEEDT  
WEPMEGLCDCHDKIKAFVVKGFNSKILPLPGDVDVICGGPPCQGISGFNRFRNKDKPLED  
EKNKQLVVYMDIVEYLKPRFALMENVVDIVKFAKGFLGRYALGRLVSMNYQARVGLMV  
AGSYGLPQFRRRMFMWGARPSEFNLFNTSFDVQKLPQYPLPTHNVVTRGVSPLEFESNTV  
VHEEGQKVELEKELFLGDAISDLPPVPNDETRDEMPYEEMPKEFQKFIRLKKDDMPGFS  
ASGQDSSDHLLYDHRPLKLNDDDYQRCVQIPKRKGANFRDLKGVRVRKDNHVEWDPDV  
ERVYLPSGKPLVPDYAMTFVDGRSSKPFGRMWWDETVPVTVTRAEPHNQAILHPLQDRV  
LTIRENARLQGFPDYKLVGPIKERYIQVGNVAVPVARALGYSLAMSCKGSSGAEATFTL  
PSKFPNIQPVTSPSVDQQNQ

>CcCMT3\_like3

MPSSKRKSASLKDADLASPTSEKRPKSEEEKGEILPNADAVEAPAVNNGDSSVRSSGRR  
SENNKEEAELNDDEESRLVGDPDDEARQRWPHRYLGKNDACIYLYGTSLTEPQKELIQA  
RRHFTEALVDGCIPFKLGDGQYVQAGEGEESYICRIVELFEGVDGAPYFYAQWFYRAKDT  
ACSNLIDDKRVFLSEIKDDNPLDCLLQKLKIVRVPLDVDVASKRAMLLDGNYYYDMLYLV  
PYSTYQNLPLVGSHSSNVKLKTFIGTQQLYLYTDNEADGNESESTISSESDSNAAVTETSK  
IQEDDKSEMRMLDLYSGCGAMSTGLCLGANMADVNLVTRWAVDLNRYACESLKLNPET  
TEVRNESAEDFLWLLKEWHKLCQSFSLVGGGDSQLSGDPMIVKEDETEDAVDDDDDDNDG



LDEEVFEVDKILSICYGDPKGLKKPGLYLKIRWKNYGPAEDTWEPIDGLGDCQEIKIKQFVV  
NGFKSKILPLPGDVDVICGGPPCQGISGFNRNRYRNKDKPLEDEKNKQLVVYMDIVEYLKPRF  
ALMENVVDIVKFAKGFLGRYALGRLVSMNYQVRIGLMTAGSYGLPQFRMRMFMWGARP  
SEKLPQYPLPTHNVVARGVSPVEFESNAVYDEVSGIELEKELFLGDAISDLPPVANDEER  
DEIPYQEMPKTEFQKFIRLKKEDMPGFSMVGVESDHPYDHRPYKLNDDDYLRVCQIPK  
RKGANFRDLKGVQVRDDNHVEWDPDVERVYLPVGKPLVPDYAMTFVDGRSSKPFGRWL  
WDEIVPTVVTRAEPHNQAILHPLQDRVLTIRENARLQGFPDYYKLVGPIKERYTQVGNAVA  
VPVARALGYSLAMSCGTASEGPVFRLPERFPNIEAVPVAVAVEENQ

>CcCMT2\_like1

MVNSAGTGEGSGSCPPSKPPMAPSSSQSSITANYDSPALHFGQISRRRSPRLNCSKDGD  
SSVDFNKCPCQKKLRTTSPSDSFPSSPNDAPFLIGDPVSDEEARRRWPWRYECKVLSVME  
VLIFSRVPDRGDDNEWALLFFLEHEGYLRSDLFRPSVTQTKKEPFKDDDDKLIANVKCHY  
LQAKVETHVFDLGDCAVCVKGEEDEGHNVGRILEFFKTNDKDFRIQWFFRAEDTDEAA  
SHHKKRLFYSTLRNDNALDCIVSKVDFRSIPACDYYYDMKYNIDYSTYCTIKDDDCCLFSS  
HNKKEMHSNGSKTNLNGTLTSFKPHKLESLDDMYSGCGGMSTGLCFGAKLSGVDLSTI  
RNESAEDFLDLIKEWDLCKKYMVKEEKTQGNDSTFAGSADDPKPSKAKKIVPEDEYEVE  
RLVDICYSDDLGTSGRGLKFKVRWAGYGPSDDTWEPIKELSNCQEKIREFVQKGIKTNKLP  
RPGDVDIICGGPPCQGISGFNRHRNFESPLEDEKNYQIVVFMDIINFLRPKYILMENVVDIL  
RFANGRLARYAISCLVRDYYQVRLGIMAAGCYGLPQFRLRQLPPFPLPTHDVVFKYGGAS  
GFERNVVAYDEGQFRNLEKPVLLKDAISDLPLVSNSEVRDKMMYRSAPETEFQKYIRATK  
SDMLGIASGSSEVEKSVLHDHRPLQLNEDDYLRGANFRELPGIVVDDDNVVSRAPEAEL  
MPSGKHWVPDYAINLHERKSTKPFARLWWDETSTVICTPNFRCEAVLHPEQDRVLTIREN  
ARLQGFPDFYALCGTVNERYRQVGNAAVAVPVGRALGYTLGMAVQKLCGDEPLITLPPEFA  
HSTTLDLLQASSLATEP

>CcDRM2\_like2

MGDHAPGDDSENIDWDTEDELEIQNIAPSSCAQLITRDTEAVISNGKASSSAGPSNTKLVE  
HFLGMGFREQWVTKAIEKNGEGDHESILDTLFAVYQRFKCGDYELPAKRVPVAPGLVGSMSG  
LDIQGVQIFGLLMRISVLQALEDPPQGHNSCHPNHLNSPQQQQCVNDDDLSSDYDESLD  
DFSESWSWLGSETEDFDSLPEHEKTLKYLAMGYTEEEASIAMERCELAYISTNPMGPGEQ  
RNLLWPCGTRTGPGASIAVLTDFIGAAQNAKTEPVFFEDEKRKNLGENGKLLKRKLYELE  
AWKRNKQKGPLTEQDEVIRLPNPMTGFGVPSESSMVTHRTLPPDDAIGPPFFYYENVALAP  
KGSWDTISRFLYDVEPEFVDSKYFCAAARKRGYVHNLPINNRFILPLPRTISDALPLTKR  
WWPEWDKRTKLNCLQTVIASAKLTERIRKDLEKYSDYVPLDVQKKVIEDCRKWNLVWV  
GKNKVAPLEPDEVEMLLGFPRNHTRGGGISRTDRYKSLGNSFQGNPCQIGFGDWLRVFMF  
SLPKRLDSTSNPGYRWSTHSLGYRSANNPLVDTVAYHLSVLKDIFPKGINMLSLFSGIGGA  
EVALHRLGILLNNIVSVEISEANRDIVRSWWEQTNQKGNLVHLPDVQQLNGDQLEQFISSF  
GGFDLVVGGSPCNNLTGSNRVSRDGLQALDDCLVVGWYWLNDIESGYLSNAACIAPSKCFA  
FGTCVGIVLRPNVKVRLITGLDWTGWARVKKTGEEL

>CcCMT2\_like2

MFTGKKSEPCDEVSRNTSASKMVVRGSTRMNSDINVAKWGKFSTTGSDALALTLSLSSD  
FYYNSDESPVPLKVYDPSLAHGKSVRRSPRFTMGESIITTKGASKNKSVLGERVEGSSSGR

SSRLSSSTALIVGTLDRQSPKSKALPRRRLRRSPRLSPVTSHAENAGSNKLKRLPQKCLRR  
SPRLSPIPSCPQIEWEGLHTRVKGERTTDGPKLKRIKSCVEELNSNVVTEKCTKKSSARVQH  
GNGNCEKLAVPALSSAETVKDDFIPNGDTARPCGLEFHVRRKKEDSEVKSTSIRTHDKKAAS  
VGNIDFGYNKAPPVRCKTSVSSTKQQSSTKKQRKLKRASFFVGEPVPEDEAQERWHWRY  
ELKFFAVSKIRVTSEMGFEEEVNGVFQRKLGAETDLNKGKTGQRRKGQSWILNAGEEDEL  
HLNVMCHYLQANVDGCIYRLGDCARIKLHGENNNYKDKDEHRTYTSASKNRARAQL  
LIHGEGKREHVGRIVEFFKTSDDENYFRVQWFFRAEDTVMKQAAAFHEKKRLFSSTLMN  
DNLLDCILSKVKITEKAPALGLQSAIQPSEYYCDMEYSVKYSTFRSLATATNSLVARCDLTL  
PSSLDANNVTITTTPELSSCEPYKAELALLDLYAGCGGMSTGLCLGAKISGVKLVTWAI  
DYHKSACDSFKQNHPTQVRHITAEDFLELLKEWEKLCCKLYVLNDTDRGLETSSNRTKKS  
IIRESSLLDAEVAPGEYEVSSLVDICYGDPSSGKHGLKFKVRWKGYSPEEDTWELIQDLSD  
CQGHKDFVRSGYMSKILPRPGEVDVICGPPCQGISGYNRFRNTDDPLTDERNQQIIVFFD  
IVNFLPKYALMENVADILRYDKASLGRYAISRLVHMNYQSRLGIMAAGSYGLPQFRLRVF  
LWGALSSETLPQFPLPHEVIVRYFPSAEFEQNTVAYDEGQPRELKEATVLRDAISDLPAVT  
SHEDREEMAYDMPPETEFQKYIRLTKEINGSTLKGVTDWRSSVLTDHRPYKLSEDDFHR  
VCHVPRRKGANFRDFPGLVVGADNLVRRDPTKEPVLLPSGRPLVPDYVFTFEKGKSKRPF  
SRIWWDENVPTVTVFPNLHSQRAIHPEQDRVLTIREYARLQGFPDHYRFCGTVKERYCQV  
GNAVAVFVSKTLGYALGMAFQKLSGDEALMTLPPDFAFQVPPLDQFSAQL

>CcCMT3\_like1

MAKRVKRDLDKQSEEAIDSSVPSSDSKSSPPSKSKSTPAAAAADDDARFIGKPPPADQARA  
KWPHRYESKNKVKVIASSNGELDGKEIIQAKCHYTKAVVDGIAFDLNDDAFVKAEEGKP  
DFIARIVEMFETVDRELYCSAQWFFRAEDTVIKSQAHLIDKRRVFYSMDKDDNPLDSIVSK  
VKIVQLSPNVDLAEKEKALSSFDLYYDMKYSMPVTFTTLHTEKSITESDESSVISGDASSD  
GVVEKSNKKAKSTEVKECVESQMTLLDLYSGCGAMSTGLCHGTNMSGVKLVTKWAVDI  
NKHACESLKLNHTETEVRENEAAEDFLSLLKEWKNLCKEFCLLGSQHAEDTSIKSEEDSQ  
EKEGNPDPSDGEFEVVGKLLAVCYGDPNKNVNNKKLHFKVFYFPIVVEVRWKGYGPSYDTW  
EPFDGLSNCTDAMKEFVSRGYQSRLPLPGDVDVICGPPCQGISGHNFRFRNYTDPLKDPK  
NHQLVVYMDIIEFLKPKFVLMENVCDIVKFADGILGYHAVGRLVSMNYQTRMGIMAAGS  
YGDIVGSDNDKSYKLEKSILLGDAISDLPEVTNNNGKDEMEYAGAPRTSFQKYIRMKQ  
AVAKDASKRKMPLYDHRPLELNEDDYARVCQIPKIKGANFRNLPGVMVGKNNKVEWDPS  
VERVMLPSGKPLVPNYAMTFVRGTSRKPFGRLSMDDIVTTVVGRAEPHNQVLLHPNQDR  
VLTIRENARLQGFPDHYKLSGPVKERYLQIGNAVSFSVSTALGYTLAKAVQGVCTSKPLTL  
PIKFPDCLGQSTVKQAPQESE

>CcMET1\_like

MKKKGKQVKATTEMSDVTVDLKTAAATKPKQKRGSGSSEDPVSRKMPKRAASCTNF  
KSKPLRLSEKSATIENKKVQVVEEEIAAISLIAGPDDPRPNRRLTDFVFHDADGMPQPVEM  
LEVDDIFISGIILPLEKASEKEKETGVRCDFGRIEDWSISGYEDGSPVIWISTELADYDCVK  
PAASYKKLFLGFYEKAHACVEVYKRLSKSAGGNPELSLDELLAALVRSMMSGSKNFPHGAS  
IRDLIISWGGFIFEQLVGLDEAPNGTDQPFVEIPVLAALRDESKKDEECAGMNVPPGGLMN  
APLKISDGEKASKSNGPKPAVDEDEDMKLARVLQENENWQALKQKKRQRTSTSSSKLYIQ  
INEDEIANDYPLPAYYKTTAQETDEYIIFDDFDTVPDQLPRSMLHNWSLYNCDSRLISLEL  
LPMKPCADIDVTVFGSGIMTADDGSGFCLDNEAGSASGSSGVQNEGDGPIYLSAIKEWMIE

FGSSMVFISIRTDMAWYRLGKPSKQYAPWYQTVLKTARLAIAIITLLKEQTRASKLSFSEVI  
KRLYVVVHGGIILQQFAEFPDDTIRRSFVSGLEDKMEERHHTKWLVKKKAILTKAENMN  
PRAAMGPVISKRKAMPATTTQLINRIWGEFYSNYSPEEVKEGDSLDAKKDEEEEEQEENE  
QEDCEEPEEENPILPQEPEKPSASKQKTRCSKTDINWVGQAVRKMCDGKALYKEAVIRG  
EVVALGSSVLVETSGSEEDSIYYVEYLFEDSDSRKFVHGRLMLRGRQTVLGDIANEREVFL  
TNDCMEFELDDVIQTVVVQIRTLPWGFHRKANANFDKMDRAKAEDRKNKGLPIEFYCK  
SLYWPQRGAFFCLQTDKMGLGNGVCHSCEFMEAEEKKEAFVLDESKTGFTYMATEYHV  
DDFLYVGPHHFDTDERGNETYKGRNVGLKAYVVCQLQQIEAPKTSKRADPDSVMVQV  
RRFYRPEDLSSDKAYRSDIQEVYYSEQVHKLPLSAIEGKCEVRRKKDLSSLDSTYIFEHVFF  
CERLYDPAKGSLKQLPVHIKLTTPKESLVSDAAIRKRKGKSKEGENDVDMIDNQESSASKN  
CLATLDIFAGCGGLSEGLQKAGASVTKWAIEYEYPAGDAFKLNHPDALAFVHNCNVILRAI  
MTACGDTDDCISTSEADELAAKLEEDVINNLPRPGQVDFINGGPPCQGFSGMNRFNQSTW  
SKVQCEMILAFLSFAEYFRPKFFLLENVRNFVSFNKGQTFRLALASLLEMGYQVRFGILEA  
GAFGVSQSRKRAFIWAASPEEVLPEWPEPMHVFAGPELVTLNRNTQYAAARSTATGAPF  
RAITVRDTIGDLPVGNNGASAATIEYKNESVSWFQKRIRGDASVLTDHISKEMNELNVIRC  
QRIPKRPAGADWRDLPEEKVKLSTGQMVLDLPWCLPNTAKRHNQWKGLFGRLDWEGNFP  
TSITDPQPMGKVGMCFHPDQDRILTVRECARSQGFDPDRYKFSGNIQHKHKQIGNAVPPPLA  
YALGRKLKEAVEAKQRQLDHHSC

>CcDRM2\_like1

MDGDSSEHGSNDIDWNTDDELEIANISPSSPVSTSTNGAVISEFGEVVHNCTQIIADYPTPG  
MIVIYEPLISDGSKRISWSLCYKAFGFGISIGEVAAPRDVIGWTHDLRRYFRGYFVISCLTLVV  
IAKAPFKPRSILQIPPTMSSSSKCPSKLQFMTMGFPEAMVTKVIAELGEDNTDAIVDTLLTY  
SIDSLGENEMDVVVDETPNQERELNDPYLKSESHPESKFSDLDSIWSDESDSEFEKDDPL  
VCLIDMGYSPEEASAAISRCGKNAPLSELVDFISAANVSKEYDAEMNANVLGSCSHLLPK  
DKKRKFQKDNFWSKNKKFDRKNESKSKDEDHEVLHLPNPMVGFVGPREFHVVRRTLPE  
AAIGPPFFYYENVALTPKGAWNRIKSFLYEIDPEFVDSKFFCAAARKRGYIHNLPLENRFPI  
QPLPLTIFEALPGTKKWWPSWDKREQLNCILTCIGSAQLTDRIRLALENSNTEPSLHVKNY  
IIGQCRKWNMVWTGKTRVAPLEPDEIELIMGYPIYHTRGASRVERYKGLGNAFQVGTLP  
PTFYFFNRYHYHLKAGLHIFQAKCLIGIQLVYIHLIFYTFGGKTSRVFQQEFHILEVDTVA  
YHLSVLKNLYPNGMNILSLFSGIGGAELHKLGIPLNNVVSVEKSMVCRNILQGWWEQT  
NQKGNLVHLSDVQDVTNLNKLQWIDSFGGFDLVIGGSPC>NNLAGGNRRTRDGLGEGHSS  
LFFDYFRILDGVKNLMKNRS

>CcDRM2\_like3

MDGNASGEDYENIDWDTEDELEIQNIVPSTCSNLVTRNASIVGNGEASSSAGPSNP>NLLQH  
FLGMGFSEQLIVKAIKENGEANTESILESLTYAALEDSPDELNPCHLNSPQQQQCVDNGQ  
LSSDYDESFLDDISESDSWGSEVAKPKISIGANGGLKKRKLYLELELWKRKKRKGLINEED  
DVLRLPNPMIGFGVPTDTMVVTHRTLPEAAIGPPFFYYENVALAPKGVWDTISRFLYDVQP  
EFVDSKYFCATARKRGYVHNLPINH>RFP>LLPLPRTINDALPLTKRW>PEWDKRTKLNCL  
QTVIGSAKLTDRIRKALEKWGDDPPLHVQKYVIEECRKWNLVWVGKNKLAPLEPDEFEM  
LLGFPRNHTRGGGISRTDRYKSLGNSFQDMFP>NGLNLLSLFSGIGGA>EVALHRLGIPLKNV  
VSVEISEANR>DIVRS>WWEQTNQKGNLIHLADVQQLNGDRLEQFMGSFGGFDLIVGGSPC  
>NNLAGSNRVS>R>DGLEGEQSSLFYDYFRILDLVKCIMNKQQ

>CcDRM3\_like1

MDKTLRLLEIGFSEQEISAAIEKYGSEVSISELADSIVCDRMGGPCIKTEEDPFGANSWMTG  
NKFSSSMGAERVLDASFYSNLALRTEESSQAAASQIRDFDIGDSCKGKQPKEETADELITI  
QRPKPEFDDLNSYSGPACTVPKPPVSSKVLQRQLKYKARRMAATGVPKLIQPVSCSSVDQ  
MVAKAPLFFYGNVMNLSQDSWVKISQFLYAIEPEFVNTQFFSALS RKEGYIHNLPKTRNFH  
ILPKPPMTIEEVIPQTKKYWPSWDTRKQLTCINSETIGISQLCDRLRNILIDSKGLLSVEQQK  
DLLHQCRSLNLMWVGRNRVSPIEPELVERILGYPMYHTREDGLSLGERLQSLKHSFQTD  
LGYHLSVLKSMYPEGLTLLSIYSGVGGAIEITLNLGIRLKAVVSVEPSEIKRKILRQWWDK  
SDQTGELVQIENIQKLSSSKLES LIKKFGVDFIICQNPYTYAPKSVTMAAAETESFAGLDFS  
LFYEFVRVLQVRSAIKTR

>GmCMT1

MPSKRKTRSSASPAAPP SKRASRSSASRVADSAPVKSEAEVVAASSVVKEEAQASFTDV  
TDGNVSDGEGTNARFVGEPVPDEEARRRWPKRYQEKEKKQSAGPKSNRNDEDEEIQAR  
RHYTQAEVDGCMYKLYDDAHVKAEEGEDNYICKIVEIFE AIDGALYFTAQWYYRAKDT  
VIKKLAYLIEPKRVFFSEVQDDNPLDCLVEKLN IARITLNV DLEAKKETIPPCDYYCDTQYL  
LPYSTFVNLPSENGESGSETSTISSETNGIGKYE VNSQPKEAFLPEESKDPEMKLLDLYCG  
CGAMSTGLCLGGNLSGVNLVTRWAVDLNQHACECLKLNHPETEVRNESAENFLSLLKEW  
QELCSYFSLVEKKVSHEKYVNLFSEDDDDTSSNEEVNSEDDNELNEDDEIFEVSEILAVCY  
GDPNKKKEQGLYFKVHWKGYESALDSWEPIEGLSNCKE KIKEFVSRGFSQILPLPGDVD  
VICGGPPCQGISGFNRFRNKESPLDDEKNKQLVVFMDIVQYLKPKFTLMENVVDLVKFAE  
GFLGRYALGRLLQMNYQARLGIMAAGAYGLPQFRLRVFLWGAAPSQKLPQFPLPTHDVIV  
RGVIPLEFEINTVAYNEGQKVQLQKKLLLEDAISDLPRVQNNERRDEIKYDKAAQTEFQRF  
IRLSKHEMLELQSRTKSSKSLLYDHRPLELNADDYQ RVCRIPKKKGGCFRDLPGVRVGAD  
NKVEWDPDVERVYLD SGKPLVPDYAMTFVNGTSSKPFARLWWDET VPTVVTRAEPHNQ  
AILHPEQDRVLTIRENARLQGFPDFYKLCGPVKERYIQVGN AVAVPVARALGYTLGLAFEG  
STSTSDDPYKLPDKFPMIRDRVSSVSEDDV

>GmCMT4

MNDNLIDCIMGKANVTHITPRVGLKLASISSDFYYDMEYCVDYSTFRNIPTDASTVTESQ  
PCSELNKTELALLDLYSGCGGMSTGLCLGAKTASVNLVTRWAVDSDRSAGESLKLNHSDT  
HVRNESAEDFLELLKAWEKLCRYNVSSTERKLPFRSNSSGAKKRGNSEVHEISDGELEV  
SKLVDICFGDPNETGKRGLYLKVHWKGY SASEDTWEPIKSLSKCKESMQDFVRKGMKSN  
ILPLPGEVDVICGGPPCQGISGYNFRNCASPLDDERNRQIVIFMDMVKFLKPRYVLMENV  
VDILRFDKGSLGRYALSRLVHMNYQARLGIIAAGCYGLPQFRLRVFLWGAHPSEVIPQFPL  
PTHDVIVRYWPPPEFERNV VAYDEEQPRELEKATVIQDAISDLPAVMNTETRDEMPYQNPP  
ETEFQRYIRSTKYEMTGSKSNGTTEKRPLLYDHRPYFLFEDDYLRVCQIPKRKGANFRDLP  
GVIVGADNVVRRHPTENPLLPSGKPLVPEYCFTFEHGKSKRPFARLWWDENLPTALTFPSC  
HNQVV LHPEQDRVLTIREFARLQGFPDYRYFYGT VKERYCQIGNAVAVPVSRALGYALGL  
ACRKLNGNEPLVTLPSKFSHSNYLQLSKCVFGNTSNEVNSRQFRALDAEVT PGSIGQDSRV  
EDSTQLQTCYNNQPGNTD

>GmMET1

MGSASLLNPSQPGVKKNDKSKQKSVVSKTEEEVMFKDKQKKRSLSESSEQTAAMRKMP  
KRAAACKNLKEKSFLIYEKSCLIETEKDHIVEEESLAVRMTAGQDNGCPNRRITEFILHDET  
GKSQPLEVLEVDDLFIITGLVLPLEASSGKKKEKGVKCEGFGRIESWDISGYEDGSPVIWLS  
TEVADYDCQKPAASYKKVYDLFLEKARACVEVYKKLAKSSGGDPDISLDELLAGMVRS  
MSGSKCFSGAASIKDFVISQGEFIYKQLVGLDMTSKANDRMFADIPALIALRDESKKQVHA  
QVMPSNGSLRIDSGVGDEENKNQMDSVASVNEEDEDAKLARLLQEEYEWQSMNQKKNS  
RSASASNKYIKINEDEIANDYPLPVYYKTSLQETDEFIVFDNDYDIYDTQDLPRSMLHNW  
SLYNSDARLVLELLPMKPCSDIDVAIFGSGIMTSDDGSGFHLDTAGKSSVSGAQVAD  
GMPYLSAIKEWMIEFGSSMIFISIRTDLAWYRLGKPAKQYAPWYDTVLKTARLAISIITLLK  
EQSRVSRLSFGDVIRKVFSEFDKKDGSYISSDPLTVRYVYVHGQIILQLFAEFPDDKIRKSAF  
VTGLTNKMEERHHTKWLVKKKKVVPREPNLNPRAAVGPVVSRRKAMQATTTRLINRIW  
GEYYSNHLPEDAKEGIASELKDEDEVEEQEENEDDDNEETILLEGTPKAHSASKQTKKFS  
AETEIRWEGEPEGKTSSGYPVYKQAIIRGEVISVGRSVLVEVDETDEFDPDIYYVEYMFESKI  
GRKMFHGRMMQRCQTVLGNAANEREVFLTNECRDLGLHDVNQTVVNIQNRPWGHQ  
HRKDNIIADRVDRQAERKKKGLPTEYYCKSLYWPERGAFFSLPLDTLGLGSGVCPSCKI  
QDAEKEKDVFKNSSKSGFLKGTESLNDYIYVSPFEFEEMIEQGTHKSGRNVGLKAYV  
VCQVLEIVVKKEIKEAEIKSTQVKIRRFRRPEDVSNEKAYCSDIQEVYYSDETHIISVESIEG  
KCQVRKKNDIPECSALGRMFQNVFFCELLYDPATGSLKKLPAHVVKVYSSGQTSDAAR  
KRGKGCIEGDDVLESPNEGKTLNEKRLATLDIFAGCGGLSEGLQQSGVSSTKWAIEYEPA  
GDAFKANHPEALVFNNCNVILRAVMEKCGDTDDCISTSEAAELAACLDEKEISSLPMPGQ  
VDFINGGPPCQGFSGMNRFNQSSWSKVQCEMILAFLSFADYFRPRYFLLNVNRFVSFNK  
GQTFRLTLASLLEMGYQVRFGILEAGAYGVSQSRKRAFIWAASPEDVLPEWPEPMHVFSA  
PELKITLSENVQYAAVRSTANGAPLRSITVQDTIGDLPAVGNGASKGNMEYQNDPVSWFQ  
KKIRGDMVVLTDHISKEMNELNLIRCQKIPKRPAGDWRDLPEEKIKLSTGQVVDLIPWCLP  
NTAKRHNQWKGLFGRLDWQGNFPTSITDPQPMGKVGMCFHPDQDRILTVRECARSQGFP  
DSYQFAGNIIHKHRQIGNAVPPPLASALGRKLKEAVDSKSST

>GmMET2

MGSASLLNPSQPGVKKNSKSKQKSVVSKTEEEKVMVKDKQKKRSLLESSEQPAATRKMPK  
RAAACKNLKEKSFLISEKSCLIEMEKDQIVEEESLAVRMTAGQDDGRPNRRITEFILHDATG  
KAQPLEVLEVNELFITGLILPLEVSTGKKKEKGVKCEGFGRVESWDISGYEDGSPVIWLST  
DIADYDCQKPAASYKKVYDLFLEKARACIEVYLKAKSSGGDPDISLDELLAGMVRSMS  
GSKCFSGTASIKDFVISHGEFIYKQLIGLDMTSKANDRTFADIPALIALRDESKKQANYVHA  
QVMPSNGSLRIDSGVGDEENKNQMDSVASVNEEDEDAKLARLLQEEYEWQSMKQKKNS  
RPTSVSNKYIKINEDEIANDYPLPAYYKTSLQETDEFIVFDNDYDIYDTQDLPRSMLHNW  
SLYNSDARLVLELLPMKPCSDIDVAIFGSGIMTSDDGSGFHLDTAGQSSSVSGAQVAD  
GMPYLSAIKEWMIEFGSAMIFISIRTDLAWYRLGKPAKQYAPWYDTVLKTARLAISIITLL  
KEQSRVSRLSFGDVIRKVFSEFNQKDGSYISSDPLTVRYVYVHGQIILQLFAEFPDDNIRKSS  
FVTGLTNKMEERHHTKWLVKKKKVVPREPNLNPRAAVGPVVSRRKAMQATTTRLINRI  
WGEYYSNHLPEDSKEGIASELKDEDEVEEQEENEDDDNEETILLEGTPKAHSASKQTKKI  
SADTEIRWEGEPEGKTSSGYPVYKQAIIRGEVISVGRSVLVEVDETDEFDPDIYYVEYMFESK  
IGRKMFMHGRMMQCGCQTVLGNAANEREVFLTNECRDLGLHDVKQTVVNIQNRPWGH  
QHRKDNIIADRVDRQAERKKKGLPTDYYCKSLYWPERGAFFTLPHDTLGLGSGVCPSC  
KIQDAEKEKDVFKNSSKSGFLFNGTEYSLDDYVYVSPFEFEKIEQGTHKSGRNVGLKA

YVVCQVLEIVVKKEIKQAEIKSTQVKIRRRFRPEDLSNEKAYCSDIREVYYSDETYIISVESI  
EGKCQVRKKNDIPECSALGGIFQNVFFCELLYDPATGSLKKLPAHIKVKYSSGQTSDAAAR  
KRKGKCIEGDGVSESTKEGKTLNDKRLATLDIFAGCGGLSEGLQQSGVSSTKWAIEYEPA  
GDAFKANHPEALVFINNCNVILRAVMEKCGDTDDCISTSEAAELAACLDEKEISSLPMPGQ  
VDFINGGPPCQGFSGMNRFNQSSWSKVQCEMILAFLSFADYFRPRYFLLNVRNFVSFNK  
GQTFRLTLASLLEMGYQVRFGILEAGAFGVSSQSRKRAFIWAASPEDVLPWPEPVHVSAP  
ELKITLSENVQYAAVRSTANGAPLRAITVRDTIGDLPVGNNGASKGNMEYQNDPVSWFQK  
KIRGDMVVLTDHISKEMNELNLIRCQKIPKRPADWRDLPEEKIKLSSGQVVDLIPWCLPN  
TAKRHNQWKGLFGRLDWQGNFPTSVTDPQPMGKVGMCFHPDQDRILTVRECARSQGFP  
DSYEFAGNIIHKHRQIGNAVPPPLASALGRKLKEAVDSKSST

>GmDRM1

MQFHNYVGSEGDSSPSDYDWNTDDELEVFGIPPSDPTISSQESCEDSVGESSASCSSAKH  
SKLIHLFVGMGFSRETVIKIDENGRDNEEDIMEALLTLTAEKPLTVEKDEALSVLVNMGY  
PFEEALTAIDKCGPKAHISELADFISASQLEKGLHSPQESPNNKHDAADYTHEKPCQPSGEY  
YLHTSKKVKLGLGIFNEASQVISRKFPREVANKPYFYFENVALAPKGVWKTISRFLYEIEPE  
YVDSKYFCAATRKRGIYHNLPTHNRSPLLPIPLTIQEAFTTKKWWPSWDRRTKLNCLLT  
RVAPGPVTERIRKLLLEKFGDEPPLHVQENVLVEIRKWNLVWVGKNKLAPLEPDEYEMLLG  
FPRDHTRGGGVTRTERYKSLGNAFQVNTVAYHLSVLKGRFPNGINVLSLFSGIGGAEVALH  
RLGMMLKNVVSVEIAEVNRNIIRSWWEQTNQRGNLIEVEDVQKVSSNELSQWITKFGGF  
DLIIGGSPCNNISGSNRVSRHGLEGEQSSLFYEFYFRIVEAVMEIQRDELL

>GmDRM2

MGGDDSGLESDNFDWNTDELEIQNYNSSSSCLTLPNGDAVTGSGEASSSAVLANSKVLD  
HFVSMGFSREMVSQVIQYGEENEDKLEELLTYKALESSSRPQQRIEPDPCSENAGSSW  
DDFSDTDIFSDDEEIAKTMSENDDTLRSVLKMGYKQVEALIAIERLGPNASLEELVDFIGVA  
QMAKAEDALLPPQEKLYQNDYAKSNKRRLDYEVVLGRKKPRGCEKKILNEDDEDAEAL  
HLPNPMIGFGVPTESSFITHRRLPEDAIGPPYFYENVALAPKGVWQTISRFLYDVEPEFVD  
SKFFCAAARKRGIYHNLPIQNRFPLLPLPPRTIHEAFPLTKKWWPSWDIRTCLNCLQTCIGS  
AKLTERIRKAVEIYDEDPPESVQKYVLHQCRKWNLVWVGRNKVAPLEPDEVETLLGFPRN  
HTRGGGISRTDRYKSLGNSFQVDTVAYHLSVLKEMYPNGINLLSLFSGIGGAEVALHRLGI  
PLKNVVSVEKSEVNRNIVRSWWEQTNQKGNLYDMDDVRELDGDRLEQLMSTFGGFDLI  
VGGSPCNNLAGSNRVS RDGLEGEKSSLFYFRILDLVKNMSAKYR

>GmDRM3

MAGNPNRREGKTVMPKTENLDYELPPYTSFSGDVGDNVASSSGGKLRAFFIGMGFLPCL  
VDKVIEENGEENS DILLEALLRYSALQKSNSQSSVSLDSLFDKDPPEISNVNQAKEEPDEL  
SGVDDTRGSLLMMNFSVEEVEFAIHLKGDEASIPELVDFIFALQIAKKLKEPDDITFTYY  
GRGNEVTNEKLFGIMAKTLQLFEMGFSENEVSSAIDKLGSEAPISELANFIFAEQNGIDYV  
MEYKFPTTSTYSVGIKEEPEMDLYGTAEVKVEGFSHEPPQSSQVNLEETYNDDMVKEEEG  
IDAFPSNVSDQYLDVVENGRGKRPKYEHDDDPVNCLEPSWVEERVDVAVVAEMSRHPKPN  
PSRCLSSVAAKPPFFLFGNVSNISYDSWTKMSQFLYGIEPEFANAQSFSAMDRIEGYIHNLP  
VENRFHILPKPMTIEDAMPQTKKWWPPWDSRKLSSIYCETNGIAQTCDRLGNFLADSG  
GVLTSQQKDILRYCRRNLNVWIGKFKLGPVEPEQLELILGYPLNHTRATEGNVAERLKS

KYCFQDTDLGYHLSVLRPIFPHGLTMSLFSGLGGAEIALHRLAIKIKAVVSVETSETKRKI  
LEKWWRQSGQTGTLVQIEDIQKLTSKKLEGLISKFGGFDLVIYQNPCSYSSSRLQAGVGLS  
ALDFS VFCECVRVLQRVRGMYQRK

>GmDRM4

MAGNSNRREGKPVMMVPKTEDLGYELPPYTSFSGDVGDNVASSSGGKLRAFFIGMGFLPCL  
VDKVIEENGEENS DTLLEALLRYS AHKSNCD SFD SLGVSHNTSRGRSAPNFYPDGHSKEA  
LQKSNSQSSDSLDSLFD DKDPPEISNVNQAKEEPDEL SGVIDDKRGSLLMMNFSVEEVELA  
IHKLGD EASIP ELVDFIFAWQIAKKLKEPDDITFTYYGRGNEVTNEKLFGIMAKTLQLFE  
MGFSENEVSSAIDKL GSEAPISELANFIFAEQNGIDYVMEYKFPTTSTYSVGIKEEPEMDLY  
GTAEVKVEDFSNEPPQSSQVNLEETYNEDMVKEEEGIDAFPSYVSDQYLDVVENGRGKRP  
KYEHDDDSITCLEPSWVEERVDVVVAEMSRRPKPNPSRCLSSVAAKPPFFLFGNVSNISYD  
SWTKMSKFLY GIEPEFANAQSFSALDRIEYIHNLPVENRFHILPKPPMTIEDAMPLTKKW  
WPPWDSRKQLSSIYCETNGIAQTC DRLGNILADSGGVLTSELQKDILRYCRGLNLVWIGKF  
KLGPVEPEQLELILGYPLNHTRASEGNVAERLKS LKYCFQDTDLGYHLSVLRPIFPHGLTM  
LSLFSGLGGAEIALHRLGIKIKVVVSVETSETKRKILERWWRQSGQTGTLVQLEDIQKLTSK  
KLEGLISKFGGFDLVIYQNPCSNLSSRLLAGVGLPALEFSVFCECVRVLQRIRGMYQRK

>GmDRM5

MGGDDFDWNTDDELEIENYNSSSSCLTLPNGDAGEASSSAVLANSKVLDH FVNMGFSRE  
MVSKVIQEYGEENEDKLL EELLSYKALESSPQPQQRIEPDPCSENAGSSWDDFS DTDIFS  
DDEEIAKTMS ENDDTLRSLVKMGYKQEEALVAIERLGPNASLEELVDFIGVAQMAKAEDA  
LLPPEEKLQYNDYAKSNKRRFYDYEVLGRKKPRGCEKKILNEDDDEEDEALHLPNPMIGF  
GVPTESSFITHRRIPEDAIGPPYFYENVALAPKGVWQTISRFLYDVQPEFVDSKFFCAAAR  
KRGYIHNLP IQNRFP LLPLPPRTIHEAFPLTKKWWPSWDTRTKLNCLQTCIGSAKLTERIRK  
AVEIYDEDPPESVQKFVLHQCRKWNLVWVGRNKVAPLEPDEVETLLGFPRNHTRGGGISR  
TD RYKSLGNSFQVDTVAYHLSVLKEMYPNGINLLSLFSGIGGAEVALHRLGIPLKNVVSVE  
KSEVNRNIVRSWWEQTNQKGNLYDIDDVRELDGDRLEQLMSTFGGFDLIVGGSPCNNLA  
GSNRVSRDGLEGKESSLFFDYFRILDLVKNMSAKYR

>OsMET1

MDKCGDSDDCISTSEAAERA AKLSEDKIKNLVPVGEVEFINGGPPCQGFSGMNRFNQSPW  
SKVQCEMILAFLSFAEYFRPRFFLLENVRNFVSFNKGQTFRLTLASLLEMGYQVRFGILEA  
GAYGVAQSRKRAFIWAAAPGETLPEWPEPMHVFASPELKITLPDGKFYAAVKSTAAGAPF  
RSITVRDTIGDLPAVENGAGKPTIQYGS GPVSWFQKKIRSDMASLNDHISKEMNELNLIRC  
KHIPKRPGCDWHDLPDEKVKLSTGQMVDLIPWCLPNTAKRHNQWKGLYGRLDWEGNFP  
TSVTDPQPMGKVGMC FHPEQDRIITVRECARSQGF PDSYRFAGNIQNKHRQIGNAVPPPLA  
YALGRKLKQAIDAKR

>OsMET2

MDKCGDADDCISTSEAAEQAAKFSQDNIMNLPVPVGEVEFINGGPPCQGFSGMNRFNQSP  
WSKVQCEMILAFLSFAEYFRPRFFLLENVRNFVSFNKGQTFRLTVASLLEMGYQVRFGILE  
AGTFGVAQSRKRAFIWAAAPGETLPDWPEPMHVFASPELKINLPDGKYAAAKSTAGGAP  
FRAITVRDTIGDLPKVENGASKLLLEYGGEPISWFQKKIRGNTIALNDHISKEMNELNLIRC

QRIPKRPGCDWHDLPDEKVKLSSGQLVDLIPWCLPNTAKRHNQWKGLYGRLDWEGNFPT  
SVTDPQPMGKVGMCFHPDQDRIITVRECARSQGFPDNYQFAGNIQSKHRQIGNAVPPPLAF  
ALGRKLKEAVDAKRQ

>OsCMT1

MVPEPAPAAATEPRRSTRRLMTAAAMEAEAEAVADLDEIDREMSRAESRKRQRRTAKEK  
PGARKGATEWKPEDVEKAAAAEGVAELDEIDREMPPELKRQRRTAKEKPSAHEGATE  
WKPEDVEKAAAQEPEGTELD SGLSPAESRGKRQRGVEKVKRRTRKKTAKETKETTEKS  
AAQAPEKMKVNDAGGALAEDVCADEPD AEQMAMEEEEEAAADVLEAEERMGKCVGEGS  
AEKAATRKRVARPSTARRVEDSDDHFVGDVPDDEARQRWPVRYSRKGSDSLKQEPDE  
DEEMKARCHYLAANVDDEIYHLDDDVYVKAGPDEENYIGRITEFFEGVDRGSYFSCQWF  
FRTADTVISSKLLKVHDHRHNH KRVFLSKEKNDNLIECIVSKVKIAHVDPNMTPQARAHAI  
SDCDLYYDMSYSVAYSTFANLPADNDGALGSEATSNISCDDADNSSKGKLSADIVAPYSEQ  
TETASLLDLYSGCGAMSTGLCLGFAFSGINLETRWAVDINKYACACLKHNPYSQVRNEK  
TEDFLALIQQWDALCRKYVVHKNDTLEPSIDMPLNDADDVNEPLPEDIFDVEELLEICYG  
DPSNTGKNGLWFKVVRWKGYDPSYDTWEPIDGLSDCPERIKEFVEKGHKENILPLPGAVDV  
ICGGPPCQGISGFNRFRKHNDPLEDEKNKQLVVFMDIVKYLRPKYVLMENVVDILKFADG  
FLGRYAMSCLVAMNYQARLGMMMAAGYYGLPQFRMRAFLWGALPSMVL PKFPLPTHDAV  
VRGIVPTTFSQSVVAYNEVDTRCLRKALLLADAISDLPKVGNDQPKDVIEYSVAPKTEFQR  
YIRNNRKDIQDYSFRGDDPSEEGKLFDHQPLKLNKDDYERVQRIPVKKGANFRDLKGVIV  
GPDNTVRLDPNISRERLSSGKPLVPDYAISFVKGKSTKPFGRLLWDETVPTVVTRAEPHNQ  
IILHPSQDRVLTIRENARLQGFDPYYRLIGPLKEKYIQVGNVAIPVARALGYALGLAYRGE  
SDGDRAVLKLPESFIYADQETVVKSSAGTPGSEIADSEQLFEYFINPNFFCMMFAFLKVVN  
VIPLILDSKMGLSRRGAEEGEARRAVPFQNILSWEGWNRLDHRRGEIRLDVRREMDD SPL  
DNLFDGNGLDSSAGADSSSSTGSPPSSTSSSPSSQSPPPGSSPPASPPPSTPSAPPTNSSGSA  
PSPPSPSQSAPPANTGGGGSPPSHGSPAPKAVQSQPAPKRSGDGGSSSDSGSSKEGGSSSD  
RGKSESNGNRPGPEAAIIAGMVIGFFTALLLAIVACVCCSKKKKRPPHMHMPYYTDENG  
KVVYANSMPRWQNSVDQGGGWHAQYSPGQAPPSSEMSGSHGAGPLPPSPGMALGFSK  
SSFSYDELALATGGFSSANLLGQGGFGYVYRGVLAGSGKEVAVKQLKAGSGQGEREFQA  
EVEIISRVRHRLVSLVGYCIAGSSQRLLYEFVPNDTLEHHLHGLHIFPALFPAIVTRHSEG  
RAGDGLDDEARHRARLSQGPRVPSRRFLQGQILSVRPSNDLICIVVVTYEGHPRIIHRDIK  
AANILLDENFDAKVADFG LAKLTDTNTHVSTRVMGTFGYLAPEYASSGKLTDKSDVFSF  
GVMLELITGRRPVDPTNYMEDSLVDWARPLLARALSEDGSFDELIDQRL ENKFDRLEME  
RMAACAAA VRHSAKRRPKMKQIVRALEGDASLDDLNEG VKPGQSM MFSTGSEYDSGN  
YASDINRLRKVAFESSIEDSSEYGTHSSADSGEP RRRQHR

>OsCMT2

MEASVSQIRRSPPRIEKRRKKKNHNSLSGKAPPTRGNCDSLPPVWNAKSASECHWTRRLTS  
NYLSLVVVVVGEELPPCFAPPPMETPPDPVSPPPPAADEGSPGGDDGAEDAGGFSAGLDS  
LWTALFGSPEELEPMWSPPRGFGVGAEEFAAAEVEPEIMDVAGGPWDGAPWRSSGVVAGE  
GAATALVPPTAAAGFAEFEPAAPIDSYPAGAAAASLGDVPEVSALDSGVDCSPDPPSSSP  
VDFDARGFDPVADSAPAMESPLPPSVASSEANLDGRMLDCTLNSVSPPLASPYEVLGAE  
DPIKDSSPSVAWGTTMDAKDPEVDATCANGTALRRSRIMKIKSAASSMPLNQNGDSSRA  
SKRRVADSRSRSSEGSKLPAFTGPISVNTVDLINGVKVQGLQEIVAVENVSSSYDNNQKA



GGLYNQVVVALPAASNSLLKDKGASVLP RRKTRLASKVLVNSDRVSAISPVVNGGPPVQK  
SDVCIPTKKHKLAVEECLTSLDGVDGGGIVLCNSKLKSAKSRVVSKTPQGRGRRSPQPPKT  
QRARTLSVKYLEKLKRAENNNNGSMSKSPRVPMPENNGSMSKSPRVPIPELSTKHEL  
LDKHMVDSVMLETDDGSCFFVGDAVPDDEARKQWPHRYEINDQIMKKDKRTSSQTF  
AKLVTVSFCVVFMYVYLQMLDFRGPEGKPNYIGRLLEFFETKTGECYFRVQWFFTAEDTVIGE  
QAQSHDPRRLFYSDLTDDNLLDCIVSKVTIVQVPPSVDGKSKSVSSDYDDMKYSIDYST  
FSTIEMEDTDDLMQSCYTSRINDKMKKIDVNKKHKSPVLEKMELSLLDLYCGCGGMSTG  
LCLGARGGGVNLSARWAIDDEIACESFRNNHPETRVNRNETTDDFLELLKEWEKLCKTYV  
KHSRTKACVDSTTESNNETPDCSTVPPEEFVWKLVDICFGDPNKVSKHGLYFKVRWKG  
YGPHTDWEPEGLRNCKEAIKDFVIEGHRQRILPRPRRNIAVFLLRPSKFPLGDVDVVC  
GGPPCQGISGYNRNREFEAPFKCEKNQIIVFMDVVQFLKPKYVYMENVLDILKFADAT  
LARYALSRLVAMHYQARLGIMAAGCYGLPQFRMRVFLLGCHSKEKLPPFPLP  
THEAIVKNGCPLAFERNLVGWPNDTPMQLARPIVLEDILSDLPEVANGESRDEMLYV  
KGPQTEFQRYIRSFNVEVHGPRAHVTKDSKSSKLYDHRPLVLDNDNYQRILQIPKRK  
GANFRDLSGVIVGPDNVARLDPTKERVLLPSGRPLVLDLILAYENGKSLRPFGRV  
WWDEVVGTVLTVPNARMQALIHQAQDRLLTIRESARLQGFPDNYRFRGT  
VKDRYRQIGNAVAVPVGRALGYALAMAYLKKSGLDPLMLLPPNFAFSHDLRGFA

>OsDRM1a

MRIASSSGILMDANGKANGSAPSALVAYFLGMGFSREMVFRAIKEIGD  
TSEQILELLLTYYQAIGSDPSVGNSSHSACDPQILEEEDEEEDVNWDEDDTV  
DNFDRATYSDGSGDEDFLQEMSEKDEKIKSLVSMGFPEDEDETFSSFGGRKK  
TKLIDGSKKKRERYSRPQWNQVPFDGSHEPMPPLNSMVGFSLPNDGLRSV  
HRNLDPQALGPPFFYYENVALAPKGVWTTISRFLYDIYPEFVYSKYFCAAARK  
RGYIHNLPKINRNYTRGVSRRTARYALGNSFQVDTVAYHLSVLRDIFPNGM  
NVLSLFSGIGGAEVALHRLGICMKTVVLEISEVNMTLLRSWWDQTQTGT  
LIEIADVQNLTAEIRIELFIRRFGGFDLVIGGSPCNNLAGSNRYHRDGL  
EGKHSALFYHYRILDSVKTIMASIFGAKGKLFRHVRKALLLKQSSSLTLKTE  
QDPSNNSDKDSMDK

>OsDRM2

MQAIGGDASVGNCASACAPQTLEVDEEEDDTNWDEYDTAGNCDRTPHSDGSGDEDF  
FQEMSEKDEKMKSLVNMGFPEDEAKMAIDRCLDAPVAVLVDSIYASQEAGNGYSANLSDYE  
DTEFSSFGGRKKTRFVDGSKKRKRYGSGPSGNQVPFDGSHEPMPPLNPMVGFSLPNERL  
RSVHRNLDPQALGPPFFYYENVALAPKGVWTTISRFLYDIQPEFVDSKYFCAAARKRGYI  
HNLPIENRSPVLPMPPKTISEAFPNTKRWWPSWDPRRQFNCLQTCMASAKLTERIRCALGRF  
SDVPTPQVQKYVLDECRKWNLVWVGKNKVAPLEPDEMEFLLGYPRNHTRGVSRTERYR  
ALGNSFQVDTVAYHLSVLRDLFPNGMNVLSLFSGIGGAEVALHRLGIHMKTVISVEKSEV  
NRTILKSWWDQTQTGTGLIEIADVRHLTTERIETFIRRFGGFDLVIGGSPCNNLAGSNRH  
HRDGLEGEHSALFYDYIRILEHV KATMSAV

>SIMET1

MASPQPNSESVLELPNNDKSGHKKNKRKQDSVSKRKASATGKKEKKQAVSETIEEPTAGR  
KRPKRAAACSDFKESVHLSKKSSVIETKKDHCVDEEDVAIRLTAGLQESQRPCRRLTDFV  
FHNSEGIPQPFGMSEVDDLFIISGLILPLEDSLDKVKAKGIRCEGFGRIEWAISGYEDGTPVI  
WISTETADYDCLKPSGSYKKFYDHF LAKATACVEVYKKLSKSSGGNPDLSLDELLAGVVR

AMTGKCFSGGVSIRDFVITQGGFIYKELIGLDDTSKKTQDLFVELPVLASLRDESSKHETL  
AQPETISSGNGLRIGPKAGNGGDKIVESGLANGPAPEDEDLKLAKLLHEEEYWCSLKQKK  
DRNTSSSSSKIYIKINEDEIASDYPLPAYKTSNEETDEYIVFDSGVETYHIDELPRSMLHNW  
ALYNDSRLISLELLPMKACADIDVTIFGSGVMTADDGSGYNFDTDANHSSSGSRSAEID  
GMPYILSAIKEWMIEFGSSMIFISIRTDMAWYRLGKPLKQYAPWYEPVIKTARLAVSIITLLK  
EQNRVARLSFGEVIKRVSEFKKDHPAYISSNVDIVERYVVVHGQIILQQFSEFPDVSIRNCA  
FAVGLSRKMEERHHTKWVIKKKKVMQRLEQNLNPRASMAPSVKRKAMQATTTRLINRI  
WGEYYSNYSPEVSKEVADCEVKDDDEEPDEQEENEEDDVPEENLDVPEKAHTPSSTRRIK  
SRSDSKEINWDGESIGKTASGEQLFKKARVHGHEIAVGDSVLVEHDEPDELPSIYFVEYMF  
EKLDGSKMLHGKMMQRGSDTVLGNAANEREVFLINECMNLQLGDVKESIAVNIRMMMPW  
GHQHRNTNADKLERAKAEDRKRKGLPTEFYCKSFYRPEKGAFRLPFDKMGLGNGLCYS  
CELQQTDEKESFKFDMKSSSFVYLGTEYSVDDFVYVSPDHFTAERGNGTTFKAGRNVG  
LMAYVVCQLLEIVGPKGSKQAKVDSTNVKVRFFRPEDISSDKAYSSDIREIYSEDHITVP  
VEIHKGKCEVRKKYDISSEDVPAMFDHIFCEYLYDPLNGSLKKLPAQINLRLSKIKLDDATS  
RKRKGKGKEGVDEVGELNETSPQNRLSTLDIFAGCGGLSEGLQHSGVTDTNWAIEYEAPA  
GDAFRLNHPKTKVFIHNCNVILRAVMQKCGSDDCISTPEASELAAAMDESELNSLPLPG  
QVDFINGGPPCQGFSGMNRFNQSTWSKVQCEMILAFLSFADYYRPKFFLENVNRFVSFN  
QKQTFRLTVASLLEMGYQVRFGILEAGAYGVPQSRKRAFIWAASPEEVLPEWPEPMHVFA  
VPELKIALSETSYAAVRSTASGAPFRSLTVRDTIGDLPVVGNGASKTCIEYQGDPVSWFQ  
KKIRGSSITLSDHISKEMNELNLIRCQRIPKRPADWRDLEDEKVKLSNGQLVDLIPWCLP  
NTAKRHNQWKGLFGRLDWDGNFPTSITDPQPMGKVGMCFHPDQDRIVTVRECARSQGFP  
DSYQFAGNILHKHRQIGNAVPPPLAYALGRKLKEAVESKNRLT

>SIDRM7

MDNNFSGEDNDSIDWDTEDELEIQEMPDAFSSCTNLRVSGYHTVSGHREARSSSEPCQS  
KFIQQFIVMGFPEESIAKAIEQNGENEGVLVDALLTFKALEDSPPEQPSTSTQMEPCITSDDS  
SSQYNENFLDDVSEDDSWSLDSDCNVNSAKQSYLNDDNCSLSENEKTLLFLANMGYPAE  
EASIAMERCGPEAPFPELIDFMCAAQMAREEDVHLPEDKPKLNSGGYKRKMYNEVRVK  
KKQRAITDEETIHLPRPMIGFGVPTESLPAVVKRTLPEQAIGPPFFYYENVALAPKGVWDT  
MTRFLYDIEPEFVDSKYFCATARKRGYIHNLPIDRFPLPLPPRTIHEAFPLTKKWWPSWD  
TRTKLNCLQTSIGSARLADRIRKAMKAMENFDSEPLMVQKYLDECRKWNLLVWGRN  
KVSPLETDEFEMLMGFPRNHTRGGGISRTDRYKSLGNSFQVDTVAYHLSVLKDLYPNGIN  
VLSLFSGIGGAEVALYRLGIPLNNVVAVEISEVNRNILRSWWEQTNQKGNLIDFHDIQQLN  
GDVLEQMIDSIGGFDLVIGGSPCNNLTGSNRVTRDGLGKDDSSLFYDYVRVVDLVKSIMSN  
RRV

>SIDRM6

MDKNLSGEDNDDIDWDTEDELEIQEIQDTVSSCTDLRTTGQHVCCDVEASSSVPFRRS  
KFIQQFVVMGFPEESIAKAIEQNGENSDLVLDLSTLTFKALDDSPPEQPSVSPPLEPSISSDDS  
ASEYNKIVLDNVYEDDSWSSDSNYINTVKQCYLNDEGSSLSEKEKMLLFLGNMGYPAE  
EASIAMDRCGPKASLPVDFICAAQMSRAEDPYLLEDVKPNLKDILNDCGGYKKRMY  
NELCKRKKQREISVEEPIRLPKPMIGFGIPTESVPRMVQRILPEKIIGPPYFYENVALAPKG  
VWDTIKRHLYEIEPEFVDSKYFSATARKRGYLNLPDENRFPLFPLPPRTIHEALPLSKRWW  
PSWDTRSKLNCLQTAIGSARLTDKIRKAVEKYDGEPPMEIQKYVLYHCKKWNLVWVGRN

KVAPLEPDEVEMLLGFPHNTRGGGISRTDRYKSLGNSFQVDTVAYHLSVLRDLFPNGINV  
LSLFSGIGGAEVALYRLGVPLNNVVSVEKSEVNRNIVRSWWEQTNQRGNLHFDDVQLLS  
RDRLKKLIESVGGFDLVIGGSPCNNLAGSNRVS RDGLE GKESLFFDYVRILDDVKSIMSR  
HR

>SIDRM5

MDKHLSEEDSDNIDWDTEDELEIQDTTFSSCDLRTNGQY AISGDGEASSSSVPGQSTFIQ  
KFLVMGFSEESIAKAIEQNGENSDLVLDALLTLKAIEDSPEEQPSASPHLEPCINSDDSSSEY  
NENFLDDVYDEDSWSSDSYCTNSVKQCYVKEESNSLSEKEQTILFLANMGYPVEEV  
SIA  
MERCPEASVSELTDFICAAQMAREEDPYLPEDVKPKLNHGSGGYKKRKM FNQLCKSKK  
PRAIFDEETIRLPKPMIGFGVPTESVSAIVRRTIPEQAFGPPFFYYENVALAPKGVWDTISRF  
LYDIEPEFVDSKYFCATARKRGYIHNLP TENRFLLPLPRTINEALPLTKKWWPSWDPRTK  
LNCLQTAIGSARLTDRIRKAVEAFDGEPPMRVQKFVLDQCRKWNLVWVGRNKVAPLEPD  
EFEMLLGFPHNTRGGGISRTDRYKSLGNSFQVDTVAYHLSVLKDMFPNGMNVLSLFSGI  
GGAEVALYRLGIQLNNVVSVEKSEVNRNIVRSWWEQTNQRGNLIDFDDVQQLNGDRLEQ  
LIDSCGGFDLLIGGSPCNNLAGSNRVS RDGLE GKESLFFDYVRILDLVKSIMSRQR

>SICMT4

MAKKQNDSSRFSTNLTPSPQKDKPISSSSSELALFY PQNEEPVPLIVFY PSSVRRRSSRFTTNK  
FSTSATEFMTKNRDTISPEKTVFLLPSPTLAGKKTPAEVTRRSRPLVSLSARTTTAKEK GK  
KVN SRKSEGGIKQVELSRKRKPASCKMDEETRKS PRFNSDSSNGVQLALPEMSACGALSA  
GGRTGTKRELLALMTTTPANSSASRKRAARGSDSVNVGNNSRGSRRKDPVFAESPGTSVK  
ITAESNSAGEKNLRSRKAQGSVNYNESKGSETKRIKSSAEKSVRKQKSNACFIGEPIDTEEA  
QQWQWRYELKNRKTQRQGWKLNSGEEDEIILNVECHYAQAKVAGFIFNIGDCAFVKGE  
GKKKHIGRILEFFKTTEGEDYFRVQWFFRAEDTVLQGAASFHDPKRVFYSTLENDNLLDCI  
VSKVNVVELPTRHDLNKKDVPPAHFYDMEYCVDYSTFRTLHNVKSSVSPSLVDVSYKPI  
TTYPLEVSPSCEPMKVELSLLDLYAGCGGMSMGLCLG TKLSGLNLVTKWAVDFNKAACD  
SLKLNHPQTHVRNEGVENFLELLKRWEKLIKSYGCS DIKTSSNIELDDRDEGENNDDSQS  
GSNASSGEYEVLRFDICYGDPNNDGKSGLHFKVRWKGYGPS EDTWEPIENLKNCGDSIK  
DFVRRGQQLKILPLPGD VDMICGGPPCQGISGYNRHRNTDDPLSDEKNRQIIIFMDVVEFL  
RPKYVL MENVADILRFDKASLGRYALSRLVHMRYQARLGTMAAGCYGLPQFRLRVFFWG  
ALPSERLPPFPLPSHDVIVKYWPSPEFERNTVAYEEGQPRDLEEALVLRDAISDMPAVTWH  
ETREERPYPETEFQKYIRLSKHEILSCTSTGVKETKEPVLS DHRPCQLNEDDYLRVCLV  
PRRKGANFRDLPGVIVGGDNVARRDTKDPKVL PNGKPMVPDCAFNFEHGKSKRPFARLW  
WDET VATLVTFPNHRAQAILHPEQDRVLTIREYARLQGFPDFYRFTGTLKERYCQVGNAVA  
VPVGRALGYALGLAYQRLAGNEPLIKLPSNFSFLT PPIDDIVVLQT

>SICMT3

MSSKRKASPADSSSDSSKRHALEVVKTVDIASDEVAEGFRDDDEFVEDRDIVCDSSIGESS  
GQKEVRRVAVRANEEQEGEFYGEIVLDSEARKKWPHRYILKDNVNINSASMSLNCQHDS  
ELIQA KCHFAQALVDNVIYKLGDDAYVKA AEDEDDYICKIVEFFQGVDDMKYFTAQW FY  
RAKDTV IKAHDQFIDKKRVFLSDIKDHNPLDCLVKKIKIVPISSNVSLQFKESLRLECDYYY  
DMKYLV PFSSFISLPSDVLSPDSESNSTISSDGDVVEVKEQKQEKKLLDLYSGCGGMSTGL  
CLGADVCDVKLVTKPSNTPTHPLLKVG DANVEDDDEGADDDDGSGSDEDEGEIFEVEEI

LEV CYGDPKEIKKPGLYFKVRWKGYGPD EDTWEPIEGLDGCQNKIKDFVTDGFKRSVLPL  
PGQVDVVC GPPCQGISGFNRFRNSANPLQDPKNKQLEVFMSIVEFLKPRFVLMENVVDL  
LRF AHGYLGRYALSRLVGMNYQARMGMMVAGAYGLPQFRMRVFMWGALPSEKLPQYP  
LPTHNVIVRGGIPTEFELNAVD FEEGLKVKLKRELLLEDALSDLPPVENNEPRDEMPYIDEP  
KSVFQRFIRSRRDGT LGTVLYDHRPLQLNEDDYQ RVTQIPKQKGANFRDLPGVRVRADNV  
VEWDPDMERVKLPSGKPLVPDYAMTFVRGTSQKPFGRLLWWDEIVSTVVTRAEPHNQAIL  
HPVQDRVLTIRENARLQGF PDYYKLTGPIKERYIQVGN AVAVPVARALGYSLALALKGLSR  
DQPLLTLPNFPCL EELVSNDES LDKV

>SICMT2

MPSKRKSSPATKPESSSGSRKSKRLVVERPDPVVAQPSDSDFEPEPVLSSKKKSTRRTTAES  
SVVACQSESNKKLKKPTVEKAESGVASPADRDFVSESDSETPSKKSTRRAAVKVEPLVDS  
VAGSDFVEEEEVDGMELGSLKKSLSISPSKRKPKRAEKVKDEECVLAGDPVPDAEARLK  
WPHRYNKGKENGTKSLNGQDDPDQLIAKCHFSRADVDGQIYYLEDDAHVKAADGEDD  
YICKIVEFFEAVDGVQYFTAQWFYRAKDTVIKSHDQFIDKKRVFLSEIKDDNPLDCLVTKL  
KIVPVPSNATSQFKENVKSNCDFYYDMKYLLPYSSFISLPPDTTSPVSSSSTISSDIDAGEVK  
EHNLEKKLLDLYSGCGAMSTGLCLGANSKGVLVTKWAVDLNKHACDSLRLNHPETQV  
RNEYASDFLSLLKEWVQLCVSCSLIKGSVPPHPLKVTDEVDEDEENDD EGEDSGDDKEG  
EIFEVEELLEVCYGD PKENNKPGLYFKVRWRGYGPEEDTWEPIDGLSDCPKKISEFVVKGF  
KANLLPLPGDVDVVC GPPCQGISGFNRFRNKENPMQDPKNKQLDVYMDIVDFLKPRFV  
LMENVVDLVKFSNGFLGRYALSRLVGMNYQARMGMMMAAGAYGLPQFRMRVFMFGALS  
SEKLPQYPLPTHKVIVRGVIPVEFESNTVAYDSVRDLELKKELFLGDALSDLPLVENNEPRD  
EMPYTDEPKSDFQH FIRMGRDGLLSVLYDHRPLQLNEDDHQ RVCQIPKRKGANFRDLPG  
VRVRPDNKVEWDPDVERVKLPSGKPLVPDYAMS FVGGSSSKPFGRLLWWDET VPTVVTRA  
EPHNQTIVHPLQDRVLTIRENARLQGF PDYYKLIGPIKERYMQVGN AVAVPVARALGYSLA  
MSIKGLSGETPLFTLPKNFPSHEDQNCNEVSQ

>FaMET1a

MGSIAAADDAAAAAAAAATAPLNDAESAPSALSSGTTKKKGRKATQKEAPAGGRGRKRNV  
PTGEEQSQSRKMPKRAAACKDFKERSVRVSEKSAFIESKEEQVVPDES LAVVMT CGKDPD  
DEKPNRRLTQFILHNEDGVAQPLEMVQHGD LFITGTLPLDASSDNGKGKGKEKGIICEGF  
GRIEAWDISGYDEGHPIIWLTTDVADYCCVKPASSYKKHYDNFCEKARACIEVYKVL SKC  
NSDCSLDELLAGIARMSGNKFSGSASIKEFIISQGVFIYNQLEGLEESSKKNDRVLAQLP  
VLAALRQECIKQGYVTSNPAASSGTLKIASDGGNSSSKVETEDED AKLARLIQEEYFK  
SMKQKKRQGVTSMSKKFYIKINEDEIANDYPEPAYYKTAIEETDEFIVV DSEDGDLPTHML  
HNWCLYNDSRLISLELLPMKACADIDVTIFGSGVMSEDDGSCGFDLDSIQSSSSGSVAPVA  
EDAYGMPVYLSSIKEWVIEWGASMPVSIRTELAWYRLGKPSKQYAKWYAPILKTARVGR  
SIITMLKAESRVARLSFADVIKRLSEFPNSNGGYISSDPASVERYVVVHGPILLQLFTEFPDG  
KIKTCPFVHGLRDKMEKRHHTKWEVNKKILQKSESNLNPRASMGPPVSKRKAMQATT  
KLINRIWGEYYSNYPENSSLVETCEKIEEDEADEEVQEDLEEDDAEENSSVVEAQRPSPI  
LRKIKSSSSSKKGFVDEEPVGKTSSGEALYKHAVLRGEEISVGGAVMVEVDGSDELPIYF  
VEYMYESSDGEKMLHGRMMQRGSDTVLGNTANEREVFLTNECINLAL KDVKQTVVVGI  
KSMPWGHKHQKENADAERIDRANA EERKKKGLPTEYYCKSLYCPEKGAFSLSCDTIGL

GSGFCFSCKANEEEEKAKEVFEVNSSKTGFIYSGVEYSVHDYVYVSPYHFSVQTIETELFKA  
GRNLGLKPFVVCQVLGIITKGSKQSEMKTQVKVRRFFRPEDISVEKAYCSDVREVYYSEE  
LHILPVDSIEGKCEVRRRSDLPECNAPALFQHIFCFEHLYPDPSNGSLKQLPANIRVKYSTVG  
GDTESRKRKGKCKEGEDVPEVEQQRVDSEHMRLATLDIFAGCGGLSEGLHQAGVSITKW  
AIEYEEPAGQAFQLNHPESKVFINN CNVILKAVMDKCGDTDDCISTTDANDLASALDEKE  
KSDLPLPGQVDFINGGPCQGFGSGMNRFTSTWSKVQCEMILAFLSFADYFRPKYFLLN  
VRNFVAFNKGQTFRLTLASLLEMGYQVRFGILEAGAYGVSQSRKRAFIWAAAPDEILPEW  
PEPMHVFGVPELKINLSSNSYYAAVRSTASGAPFRPITVRDTIGDLPVAVGNGASKVNMEYE  
SDPVSWFQKKIRGNMAVLTDHISKEMNELNLIRCKRIPKRP GADWKDLPEEKVKLSTGQL  
VDLIPWCLPNTAKRHNQWKGLFGRLDWEGNFPTSITDPQPMGKVGMCFHPDQDRIITVR  
ECARSQGFPSYQFYGNTLHKHRQIGNAVPPTLAYALGRKLKEAIDSKKRSSSQE

>FaMET1b

MGSIAAADEAATAPLNDAESAPSAPSSGTTKKKGQTQKEAPAGGRGRKRKNAPPTGEGQSQS  
RKMPKRAAACKDFKERSVRVSEKSAFIESKEEQVVPDES LAVVMTCGKDPDDEKPNRRLT  
QFILHNEDGVVHPLEMVQHGD LFITGTLPLDASSDNGKGKGKEKGVICEGFGRIEAWDIS  
GYDEGNPIIWLTTDVADYCCVKPASSYKKHYDNFCEKARACIEVYKVL SKCNSDCSLDEL  
LAGIARSMMSGNKFFSGSASIKEFIISQGVFIYNQLEGLEESSKKNDRVLAQLPVLAALRQECI  
KQGYVTSNPAASSGTLKIASDGGNSSSKVETEDED AKLARLIQEEEFKSMKQKKRQG  
VTSMSKKFYIKINEDEIANDYPEPAYKYTAIETDEFIVVDS EDGDLPTHMLHNWCLYNSD  
SRLISLELLPMKACADIDVTIFGSGVMSEDDGSCGFDLDSIQSSSSGSVAPVAEDAYGMPVY  
LSSIKEWVIEWGASMISVSIRTELAWYRLGKPSKQYAKWYAPILKTARVGRSIITMLKAESR  
VARLSFADAIRKRLSEFPNSNGGYISSDPASVERYVVVHGPILLQLFTEFPDGKIKTCPFVHGL  
RDKMEKRHHTKWEVNKKILQKSESNLNPRASMGPPVVS KRKAMQATTTKLINRIWGEYY  
SNYSPENSSLVETCEKIEEDEADEEVQEDLEEDDAEENSSVVKEAQRPSPI LRKIKSSSSSK  
KGFVDEEPVGKTSSGEALYKHA VLRGEEISVGGAVMVEVDGSD ELPVIYFVEYMYESSDG  
EKMLHGRMMQRGSDTVLGNTANEREVFLTNECINLAL KDVKQTVVVGIKSMPWGHKHQ  
KENADAERIDRANAEEERKKKGLPTEYYCKSLYCPEKGAFLSLSCDTIGLGSGFCFSCKANE  
EEKAKEVFEVNSSKTGFIYSGVEYSVHDYVYVSPYHFSVQTIETELFKAGRN LGLKPFVV  
CQVLGIITKGSKQSEMKTQVKVRRFFRPEDISVEKAYCSDVREVYYSEELHILPVD SIEGK  
CEVRRRSDLPECNAPALFQHIFCFEHLYPDPSNGSLKQLPANIRVKYSTVGGD TESRKRKGK  
CKEGEDVPEVEQQRVDSEHMRLATLDIFAGCGGLSEGLHQAGVSITKWAIEYE EPAGQAF  
QLNHPESKVFINN CNVILKAVMDKCGDTDDCISTTDANDLASALDEKEKSDLPLPGQVDFI  
NGGPCQGFGSGMNRFTSTWSKVQCEMILAFLSFADYFRPKYFLLNVRNFVAFNKGQTF  
RLTLASLLEMGYQVRFGILEAGAYGVSQSRKRAFIWAAAPDEILPEWPEPMHVFGVPELKI  
NLSSNSYYAAVRSTASGAPFRPITVRDTIGDLPVAVGNGASKVNIEYESDPVSWFQKKIRGN  
MAVLTDHISKEMNELNLIRCKRIPKRP GADWKDLPEEKVKLSTGQLVDLIPWCLPNTAKR  
HNQWKGLFGRLDWEGNFPTSITDPQPMGKVGMCFHPDQDRIITVRECAR SQGFPSYQF  
YGNTLHKHRQIGNAVPPTLAYALGRKLKEAVDSKKRSSSQE

>StMET 1

MAIRLTAGLQDSQRPCRRLTDFVFHNSKGIPQPF GMSEVDDLFI SGLILPLEDSL DKVKAQR  
IRCEGFGRIEEWAISGYEDGTPVIWISTEIA DYDCIKPSGSYKKFYDHFLAKATACVEVYKK  
LSKSSGGNPDLSDL ELAGVVRAMTGKCFSGGVSIRDFVITQGGFIYKQLIGLDDTSKKT

DQLFVELPVLASLKDESSKQETLAQPEHISSGKALHIGPKAGNGEDKIDESGLANGPAPED  
ENLKLAKLLHEEEYWCSLKQKKGRNTSSSSSKIYIKINEDEIASDYPLPAYYKTSNEETDEY  
IVFDSGVDTYHIDELPRSMMLHNWALYNDSRLISLELLPMKACADIDVTIFGSGVMTADDG  
SGYNFDTDANHSSSGSRSAEIDGMPYILSAIKEWMIEFGSSMIFISIRTDMAWYRLGKPLK  
QYAPWYEPVIKTARLAVSIITLLKEQNRVARLSFGEVIKRVSEFKKDHPAYISSNVDVVERY  
VVVHGQIILQQFSEFPDASIRNCAFAIGLSMKMEERHHTKWVIKKKKVMQRLEQNLNPRA  
SMAPSVKRKAMQATTTRLINRIWGEYYSNYSPEVSKEVVDCVVKDDEEADEQEENEEDD  
VPEENLDVPEKAHTPSTRRIKSCSDSKEIKWDGESIGKTASGEHLFKRARVHGHEIAVGD  
SVLVEHDEPDELPSIYFVEYMFELKDGSKMLHGRMMQRGSDTVLGNAANEREVFLINEC  
MNLQLGDVKESIAVNIRMMMPWGYQHRNTNADKLDRAKAEDRKRKGLLTFEYCKSFYSP  
EKGAFFRLPFDKMGLGNGLCYSCELQRTDQEKESFKFDMSSSFVYLGTEYSVDDFVYV  
SPDHFTAERESGTFKAGRNVGLMAYVVCQLEIVGPKGSKQAKVDSTNVKVRFFRPE  
DISSVKAYTSDIREIYYSEDIHTVPVETIEGKCEVRKKYDISSEDVPAIFDHIFCEYLYDPLN  
GSLKKLPAQIKLRFKIKLDDATSRKRKGKGKEGEDEVGELNETSPQNRLATLDIFAGCGG  
LSEGLQHSGVTDTNWAIEYEPPAGEAFRLNHPKTKVFIHNCNVILRAVMQKCGDSDDCIST  
PEASELAAAMDENELNSLPLPGQVDFINGPPCQGFSGMNRFNQSTWSKVQCEMILAFSL  
FADYYRPFKFFLEENVRNFVSFSQKQTFRLTVASLLEMGYQVRFGILEAGAFGVPQSRKRAF  
IWAASPEEVLPEWPEPMHVFAPPELKIALSETSHYAAVRSTASGAPFRSLTVRDTIGDLPVV  
VNGACKTCIKYQGDPVSWFQKKIRGSSITLSDHISKEMNELNLIRCQRIPKRPGADWRDLE  
DEKVKLSNGQLVDLIPWCLPNTAKRHNQWKGLFGRLDWDGNFPTSITDPQPMGKVGMCMC  
FHPEQDRIVTVRECARSQGFPSYQFSGNILHKHRQIGNAVPPPLAYALGRKLKEAVESKK  
RLT

>StCMT2

MPSKRKSSPATKPESSSGSRKSKRLVVERPDPVVAQPADSDFEQEPVLSSKRKSTRRTTAE  
SVVACQSESNNKKLKPVEKVESGVASPADSDFVSESNSATPSEKSTRQTAVKVEPLVDS  
VAESDFLEEDVDGMELGSLKKSLSISPSKRKPKRAEKVKDEECTLAGDPVPDAEARLKW  
PHRYNKGKSNGTSLNGQDDPDQLIAKCHFSRAEVDGQIYYLEDDAHVKAADGEDDYI  
CKIVEFFEAVDGMQYFTAQWFYRAKDTVIKSHDQFIDNKRVLSEIKDDNPLDCLVTKLKI  
VPVPSNATSQFEENVKSNCDFYYDMKYLLPYSSFISLPPDTTSPVSSSSTISSDIDAGEVKEH  
NLEKKLLDLYSGCGAMSTGLCLGANSKGVKLVTKWAVDLNKHACDSLRLNHPETQVRN  
EYASDFLSLLKEWIQLCVSCSLVKSSVPPHPLKVIDEEVEEDEENDEGDDSDDDKEGEVF  
EVEELLEVCYGDPKENKPGLYFKVRWRGYPEDTWEPIDGLSDCPKKIKEFVAKGFKA  
NLLPLPGDVDVCGGPPCQGISGFNRFRNKENPMQDPKNKQLDVYMDIVDFLKPRFVLM  
ENVVDLVKFSNGFLGRYALSRLVGMNYQARMGMMMAAGAYGLPQFRMRVFMFGALSSEK  
LPQYPLPTHKVIVRGVIPVEFESNTVAYDSGRDLELKKELFLGDALSDLPLVENNEPRDEM  
PYTDEPKSDFQHFIRMGRDGLPGSILYDHRPLQLNEDDHQVRVCQIPKRKGANFRDLPGVR  
VRPDNKVEWDPDVERVKLPSGKPLVPDYAMSFVGGSSSKPFGRLWWDVPTVPTRAEP  
HNQTIVHPLQDRVLTIRENARLQGFDPYYKLIGPIKERYMQVGNAVAVPVARALGYSLAMS  
IKGLSGEAPLFTLPKNFPSHEEQSCNEVSQ

>StCMT4

MEYCVDYSTFRTLHNKSSVSPSLVDASYKPITTYPLEVSPSCEPMKVELSLLDLYAGCGG  
MSMGLCLGTKLSGVNLVTKWAVDFNSAACDSLKLNHPQTHVRNEGVENFLELLKRWEK

LIKSYGCSDIKTSSNGELDDRDEGENNDDSQSGSNASSGEYEVLRRLVDICYGDPNDEGKSG  
LHFKVRWKGYSPESEDTWEPANLENCGDSIKDFVRRGQQLKILPLPGDVDMICGGPPCQGI  
SGYNRHRNTDDPLSDEKNRQIIIFMDVVEFLRPKYVLMENVADILRFDKASLGRYALSRLV  
HMRYQARLGTMAAGCYGLPQFRLRVFFWGALPSERLPPFPLPSHDVIVKYWPSPEFERNT  
VAYEEGQPRDLEEALVLRDAISDMPAVTWHETREERPYEIPPETEFQKYMRLSKHEIMSCS  
STGVKETKEPVLSDHRPCQLNEDDYL RVCLVPRRKGANFRDLPGVIVGGDNVARRDTKD  
PKVLPNGKPMVPDCAFNFENGKSKRPFARLWWDET VATLVTFPNHRAQAILHPEQDRVLT  
IREYARLQGFPDFYRFTGTLKERYCQVGNAVAVPVGRALGYALGLAYQRLAGNEPLIKLPS  
NFSFLTPIDDIVVLQT

>StDRM5

MRVQKFVLDQCRKWNLVWVGRNKVAPLEPDEFEMLLGFPKNHTRGGGISRTDRYKSLG  
NSFQVDTVAYHLSVLKDMFPNGMNVLSLFSGIGGAEEVALYRLGIQLNNVVSVEKSEVNRN  
IVRSWWEQTNQRGNLIDFDDVQQLNGDRLEQLIDSFGGFDLLIGGSPCNNLAGSNRVSRD  
GLEGKESSLFYDYVRILDLVKSIMSRQR

>StDRM6

MDKNLSGEDNDDIDWDTEDELEIQEIQDTVFPSCDRLRTTGQHVVCCDGEVSSSSVPFRS  
KFIQQFVVMGFPEESIAKAIEQNGENSDLVLDSSLTFKALDDSPREEQPSVSPPLEPSISSDES  
ASEYNENVLDNVYEEDSWSSDSNYINTVKQCYLNDEGSSLSEKEKMLLFLANMGYPAE  
EASIAMDKCGPKASLPELVDFICAAQMSRAEDPYLLEDVKPNLKDILNDCGGYKKRKM  
NELCNRRKKQREISGEEPIRLPKPMIGFGIPTESVPRMVQRILPKKTIGPPYFYENVALAPKG  
VWDTIKRHLYEIEPEFVDSKYFSATARKRGYLNLPNENRFPLPLPPRTIHEALPLSKRWW  
PSWDSRSKLNCLQTAIGSARLTDKIRKAVEKYDGEPPMEIQKYVLYHCKKWNLVWVGRN  
KVAPLEPDEVEMLLGFPKNHTRGGGISRTDRYKSLGNSFQVDTVAYHLSVLRDLFPNGINV  
LSLFSGIGGAEEVALYRLGVPLNNVVSVEKSEVNRNIVRSWWEQTNQRGNLIHFDDVQLLS  
RDRLKKLIESLGGFDLVIGGSPCNNLAGSNRVSRDGLEGKESSLFFDYVRILDDVKSIMSR  
HR

>StDRM7

MDNNSFGEDNDNIDWDTEDELEIQEIPDATFSSCTNLRNVGHHTVSGHGEASSSSVPCQSK  
FIQQFIVVMGFPEESIAKAIEQNGENGLVLDALLTFKALEDSPREEQPSTSAQMEPSISSDDSS  
SQCENENVLDDVYEDDSWSSDSNDCMNSAKQTYLNDDNSSLSENENSSLFLANMGYPAAE  
ASIAMERCPEASFSELIDFMCAAQMAREEDVYLPEDEKPKLNSGGYKKRMYNELPVRK  
KQRAITDEEPIHLPRPMIGFGVPTESLPAIVQRTLPEQAIGPPFFYENVALAPKGVWDTMS  
RFLYDVEPEFVDSKYFCATARKRGYIHNLPIDRFPLPLPPRTIHEAFPLTKKWWPSWDTR  
TKLNCLQTSIGSARLADRIRKAMKAMENFDGEPLMVQKYVLDECRKWNLLWVGRNKA  
SPLETDEFEMLMGFPRNHTRGGGISRTDRYKSLGNAFQVDTVAYHLSVLKDLYPNGINV  
SLFSGIGGAEEVALYRLGIPLNNVVSVEISEVNRNILRSWWEQTNQKGNLIDFNDIQQLNGD  
VLEQMIDSFGGFDLVIGGSPCNNLTGSNRVTRDGLGKDDSSLFYDYVRIVDLVKSIMSNRR  
V

>SmMET1

MFAPMGHGLSFIEVKLPPAFTLPHLPTHTQTPENAHSSATSTQPPPLLHRRDRSSSFASF

KRKQISSASTKDMVTNQKEKKKRASQTVEEPTVSRKMPKRAAACSDFKEKSVRISDKDS  
VIETKKDGVVEEEVLAVRMTAGKEDGRPCRRLIDFTFHNSDGISQPFEMLEVDDIFISGLIL  
PLEESADKEKCKGIRCEAFGRIEWAISGYEDGSPVIWVSTEVADYDCIKPLGSYKKFYDR  
FYAKASACVEVYKILSKSSGGNVSLDELLAGVVRMSGMKCFSRGVSIRDFILSQVLTALK  
DESSKLVDFAEAQPVSLPGNLRIGPKIEDENKNDLLAKPCLTEEDED SKMARLLQEEEDW  
RSMKQKKGRGSSSSSKYYIMINEDEIANDYPLPAYYKMSNEETDEFIIFDSGIDVLHIEDLP  
RSMMLHDWALYNSDARLVPLELLPLRPCDEIDVTIFGSGIMTADDGSGYICDGDSTQSSNGS  
GASAVEGIPVFLSAIKEWVIEFGSSMISISIRTDMAWYRLGKPSKQYAPWFERVLKTARLAI  
SIITMLKEQIRVSRLSFADVIKRISELAKDHPAFISSTLQVVERYVVVHGQIILQQFSEYPDDII  
KKCAFVIGLAKKMEERHHTKWLVKKKKLLHRNEQNLNPRAAIEPVVSKRNAMQATTTR  
LINRIWAGYYSNYSPEAR DGVNGEVKEVHEIEEQEENEEDDALEEKLVVFEQTQTTSKAP  
RQTKLSSCVEEVKWGGESVGKLLNGEDLYKRAIVHGNEIVVRGAVLLKDDDEMDDFPPIYF  
VEYMFESNGTKMFHGRMLMQRGCQTVLGN TANEREVFLTNECMDFQLQEVKESIFVDLR  
SIPWGHQHRKENANAEKIDRARAEEERKKQGLPTEYYCKSLYWPERGAFFTLPYSSLGLGS  
GSCEACNIKESERQKEKFILDASLTSFIYQGTKYSINDYIYVSPSYFSSEEMEAEIYKAGRNV  
GLKAYVICQLLEICDLKKSKRSEANSVQVKVRRFFRPEDISSEKAYSSDIREVYYSEETH TIP  
LDVIEGKCEIRKKDLGPQDIPFTSHHVFFCEHLYDPSRGSIKQLPSHIKLQYSTGQLNDDA  
TFRKKKGKCKEGENDDKPEKVVSD EHLRTTLDIFAGCGTSLTKWAIEYDAAAGDAFKLN  
HPGSLVFVNNCNVILRAIMQKCGDSDDCISTPEAAELAASMDQVEVENLPLPGQVDFING  
GPPCQGFGSMNRFNQSTWSKVQCEMILSFLSFADYYRPKYFLLENVRTFVSFNQGQTFRL  
TLASLLEMGYQVRF GILEAGAYGVPQSRKRAFIWAAAPEELLPDWPEPIHVFSAPELKISLS  
KNLQYSAVRSTSKGAPFRPLTVKDTIGDLPPVVGASNTSLEYQSDPISWFQKKIRGNLNL  
TDHISKEMNELNLIRCQKIPKRP GADWRDLPEEKVKLSTGQMADLIPWCLPNTAKRHNQ  
WKGLFGRLDWEGNFPTSITDPQPMGKVGMC FHPDQDRIVTVRECAR SQSANSVSLTTYSL  
VRSGLFFYTRRSSETELEHNTE DVASLPSTPNKLGFPDSYKFFGTIHHKHRQIGNAVPPPLA  
YALGSKLKEAVEKKRTRNASPTSTATGATPFIRFTFAGEIWQIPYDLGKFTVSFIRFIRHFHPS  
RSGAAPCFFDEKRLFDINRDRGNVVQS

>SmCMT1

MGRGKKRAEATSSPPPPISASPKKPKRSTPVDTELGFISSPVPSHEAKSRWPHRYQTKNVK  
TTVTVTLSDGSTEEKELFQARSHYTRAVVD AVVFELFDDAYIQASEGELDFIAKIVEMFET  
TNGEMYICTQWFYRAKDTV IKNQDY LIDAKRVFYSDIRDDNPLSCISRKAKIKQLPPNMA  
AAAREKAMDSYDLYVDAMYTFPHAFSNLSKDINNSPLTNGVMETKTEDVKKSPEDSQRS  
EITVLDLYCGCGAMSTGLGIGASLLGEKIVTKWAVDFNSYACESLKYNHPNTEVRNEDAE  
NFFDLLKEWENLCTKFNVVGSKDIELEPQDS DSEASEVDDGVVIPSEGEYEVQKLLAICY  
GDPNKS KKTGVYFKVRWKGYGRADDTWEPIDGLSNCEERIKEFVLRGYRARVLP LPGDV  
DFICGGPPCQGISGFNRFRDALAPLKD KKNHQLVVYMNIVEFLKPRYILMENVTDILKFAK  
AQLTSYAVGRLVSMNYQARLGIMAAGAYGVPQCRMRF FLWGAGPTEILPQFPLP THEVLK  
KGVVINEYKELIIGHGEEHCQLHKAALLGDAISDMPEVTNNTDQDEMPYGNAPRTEFQKL  
IRLSRQKIFGYSDAKKKNSHKSILHDH RPYQLNQDDYERVCHVPKFKGANFRNLPGVLVG  
PDRVVKLDESIDRPRCKSGKPLVPDYALSFEDGK SCKPFGRLGMDDIVPTVVTRPEPHNQV  
LLHPNQDRVLSVRENARLQGFPDCYKLF GPVRERYMQIGNAVSFAVSIPLGYCLAKALQG  
AQLTTPLSLPFKFPDCLGQLQSLRQEPEELVSE



>SmCMT2A

MKEQQKLDPQLPLRKSSSISSSPSARLCNGAKLEPEARPVDALALSLYVAEAEQQQQPLSI  
CYPSEHEEEEDNSVRRSPRFTSNKYKYLSPERSRSQKHTALVVSKLSMSPRIFFSSSAPATL  
TDGGNVEAGPKRRRLLALPGPAGSGVCLSERCLRSRTVLMRVAESPEASGAKRLRSVGG  
SPQIEMLALPQATPISSKNRTRPSASLNKECSVTPEKESSLAGVRRNGESAVKSKKKEKSIL  
CCFIGEPIPEEEARERWQWRYDLKSRIKGKNWKINAEDEIILNVASHYAQAKVGNFVLNI  
GDCAFVKGEGNKKHIGRILEFFKTTEGEDYFRVQWFFRAEDTVLKDTASSHDKRRIFYSL  
MNDNVLDICIISKVKIVNVPPMPCLKRNVRVQSAAFYDMEYSVQYSTFRMTMVEKSMGNE  
SFLSNSKHPDDGPITLTPLELLPGYDSPKQELTLLDLYSGCGGMSTGLCLGAKLSSVNLMT  
KWAVDYNSSACESLRLNHPETNVRNESAEDFLDLLKQWESLCKRYVSDIERTLKCELEEL  
PEAEAEDCLIPSDTEESSGEYERIEDFVRRGFNAKILPLPGDVGVICGGPPCQGISGYNRHR  
NFASPLEDERNHQIVFMDTVEFLKPKYCLMENVVDIIRFDKGSLGRYALSRLVLMRYQA  
RLGTVASGCGYGLPQFRLRVFIWGAHPGETLPQFPLPTHDVVARYWPPIEFERNIVAYDEGQ  
PRALHGAIVLGDALSDLPVTNDEDREEMAYGKPPETEFQRRIRTGAGDVLYDHRPLKLSE  
HDYMRVCRVPHRKGANFRDLEGVVIGEDNVARRDPTREAVMLPTGRPLIPECVFKLELGK  
SRRPYGRVWVWDETSTVTFPHIRAMAILHPEQDRRLSIRECARLQGFPDYRFCGTIKER  
YSQVGNVAVSIPVARALGYALGIAYRKLAGEDPLMTLPPDFSSST

>SmCMT2B

MADSAQLDSADPPLAPSPPPSLPLQLNGNSDPATPLPSSTDGGSDILDNYPQSNGVAMKK  
SANRRVETLRTSEDHFRRRSPRLTGNVAGERSVREVSSLKLDGPDEIYPPLKKPKGGKQVS  
FFIGGPVPDDEARRRWWTWRYEGAEGKQNNELSPKHKVVVDDDDGDKLVS NVKCHYSQ  
AEISKIVFDLGDCAVYKGPGRPNYVGKILEFFETMDGENYFSVQWFFRAEDTVIKNDGR  
SHDKKRLFYSTLVNDNLLDCIVSKVKVVQIKPNVCLKFVTLKDNTIPPCDYFYDMKYDVD  
YSTFSSILTDGDESELFPHPLMMSSKGKYATSKISTKCSLDENCKSELALLDMYSGCGGMST  
GLCIGAKACGLDLVARWAVDIDEAACESLKLNHPETQIRNEAAEDFLDLLKEWDCMRK  
YGKYDQKELRLKTVREADEVKLSKKNQESSCEYEVARLIDICYGDPSNSGKRGLKFKVR  
WVGYPGSDDTWEPIENLGKCPEHIRDFVQKGKAKILPRPGDVVICGGPPCQGISGYNRF  
RNFDSPLDDERNRQILIFMDIIEFLKPKFVLMENVIDILRFANGCLARYAISRLVSMHYQAR  
VGIMAAGCYGLPQFRLRVFLWGAQPLEASILNPYLGTSDIPLRRNLVLPQFPLPSHDVVIQ  
YGFPSTFERNVAYDEGKFRDLEKKVLLSDALSDLPVANNEKRDSIPLKTVPEAEFQKYI  
RAAKCDMTASPSSVTTTHKKPVLYDHRPYPMNEDDYLRVCKIPKRKGANFRDLPGIVIGA  
GNVIRRAKEQDLMPSGKPWVPDYCLSYRDGRSHKPFGRLLWDETSTVTFVCFPDHHSRAI  
LHPEQDRILTLRECARLQGFPDYMFSGSLKQRQVFMSYSQVGNVAVSVGRALGYSLG  
MAVQRLSGDEHLLTLPPKFSHSTTVELLSLLNQ

>SmCMT3

MANKRKSESATKDPAATAEGSRRSKKPASAESTGAVDEETRIPTVIDDGSEDAGEALFLG  
EPVAGEEARKRWPHRYQKDNQSTEIVQAKCHFLQAKVDGLVYCLEDDAHVKAEEGKES  
YICKIVELFQAVDGTQNFSAQWYYRADDTVIKTCNLIDNRQVFFSEVKDDNPLDCLVKK  
LRIVLLPLKVEDQVKEKLRSTHDYDYDKMYLLPYTSFVNLSSSTTNSNESGSTISSDADG  
NSVTHVFSELEGPSGEKSLDMYSGCGAMSTGLCLGANSNGVKLVTKWAVDLNYPACES  
LKLNHPETQVRNEKADDFHLLVEWEKLCTSYLSSSENKGTSSSEHVKEEVEDDSEEDENG  
EDDSEVFEEVILEVCYGPNEKESPELHFKMGSNKPECIHCSSSCPQKLKEFVLRGYKS

RILPLGAVDVVCGGPPCQGISGFNRFRNKEAPLDDPKNKQLVVFMDIVSHLRPKFVLME  
NVVDLVKFAGGFLGRYAMGSLVGMGYQARMGMMMAAGAYGLPQFRMRVFWGALSTE  
KLPSYPLPTHNVVVRGVTPLEFEANTVAYEEGCKLDLKKALVLGDAISDLPHVENDEGRD  
EIPYGSEPQTEFQRFIRQRDEMPGYLNVKSEVFEHLLCDHRPLQLNQDDYERVCQIPKKK  
GANFRDLPGVRVRPDNKVEWDPDVPRQKVSSGKPLVPDYAMTFVNGSSSKPFGRLWWD  
ETVPTVVTRAEPHNQAILHPSQDRVLSIRENARLQGFPDYYKLVGPIKERYIQVGNAAVAVP  
VARALGFSLARSLRGLSHNEPVFTLPEDYPMMRDVASPTIDMI

>SmDRM1

MILMFLVPIQDENVSGGDVSDVDWTTDDESEINLNPVTTIVGNEEACSSRSASRSKMFDHF  
VGMGFSKDLVSKAIEENGEEDSDSILNWLTFSSLEDSPQQLSTNFDPCSSDYNEIFPNDL  
SDMDSWSDDEIEDCLKPNGAPNGAANGVYRSEKHKMLLSLAASGSLTEREEKLLSLADM  
GYPLEEAEIALERC GPKALIGELSDFLCAAQMAREEDCYLPDDDLKPKHLLSGSSKSKKR  
KFLEMKKNVIEESIRLPNPMIGYGVPSMQLERVHRSRDDRAPPYFYENVALTPKGVW  
DTISRFLYDIEPEFVDSKFFSACARKRGYVHNLPIENRFPLIPLPLTIQAFPLSKRWWPRW  
DPRDKLNCIQTAIASAKLTERIRSALERVESEADPPESVQRYVMEQCRKWNLVWVGRNKV  
APLEPDEVEMLLGFKNHTRGGGISRTDRYKSLGNSFQVDTVAYHLSVLKDIYPNGVNVL  
SLFSGIGGAEVALHRLGIKLNKVVSVIEKSKVNRDIVRSWWEQTNQTGMLIDFDDVQQFDD  
TRIEQIIGSIGGFDLVVGGSPCNNLAGSNRVS RDGLE GKESLFYDYFRILGSVKSVMRNNR  
FA

>SmDRM2

MCDVVDISDDEDSFLENDAGVIPKDENLDYDLPPPKTFSMPREEDGASSSGTNLRSSFIG  
MGFAPALVDKAIKEKGEENSELILEALFSYDALQPKNEVLDNSFSGECSDSLAGNLRAEE  
DFHKSESSDSLGR LFAEGTKKNAYVEADIPLKVELDVGD SVIDEKTASLLKMNFSLDEVGF  
AMQRLVANLQDCNNEVLFGIMEKSLQLLEMGFTENEISAAFERCGSEAPVTLLAESIVTGG  
TCPLPDKYSSTLLSTSGVRRSFQSSKRKMEDYNSICIKTEEYSSDVASQVRTSDLLEKLKKGK  
MPEVDIDEPNNFKKPKEEFMEDYPSVGNSAAVLQRRGGCFASIDDDRKTISLPNACRSLS  
DGVAKPPYFLYGNVTSLSPGSWAKICKFLYSVQPEFVDSHLFSALNRKEGYVHNLPSEDRF  
HIFPKGPMTIAEAIPIYAKKCWPSWDNRKQLSSITCDTTGLPYLCEKLGRMLAECNGPPSAE  
LQTRILQQCVAKNLVWVGKQKLGPLEPEHLEHIMGYPQHHSRIAGYSLTERLKS LKLSFQT  
DTLGYHLSVLKRLFP SGVTVL SFFSGIGGAEVALHRLGIRLKG VVSVEPCETKRRIMKKW  
WEKSAQSGELIQLESINKLT

>SbCMT3a

MAPSSPSAAPTRVSGRKRAAKAEIIQEEVVVASSAKRSRKAPSSGKKPKPTPKQAKPAK  
AARKKKGEAERKEPVEDDVCAEEPDEEELAMGEEEAEEAADEQAMQEEVA AVVAGSPG  
KKRVGRRSAAAGGDHEPEFVGNAVPAAEARSNWPKRYERSTA AKKPEEDEELNAKCHYR  
SAKVDNVVYCLGDDVYVKAGENEADYIGRITEFFEGTDRCHYFTCRWFFRAEDTVINSLV  
SINVDGHHKHDPRRVFLSEEKNDNVLD CIIISKVKIVHVDPNMDPKAKAQLIEHCDLYYDMS  
YSVAYSTFANISSENGQSGSETASGISSDDVDLEAPSSMPERTATLLDLYSGCGGMSTGLCL  
GAALSGLKLETRWAVDLNSFACQSLKYNHPQTEVRNEKADEFLALLKEWAVLCEKYVHQ  
DVDSNLAGSEDQEDEGSPLDKDEFVVEKLIGICYGGSGRKGDIYFKVQWEGYGPEEDTW  
EPIDNLSDCPLKIREFVQEGHRRRILPLPGDVVICGGPPCQGISGFNRFRNRDEPLKDEKN

KQMVTFMDIVAYLKPKYVLMENVVDILKFADGYLGKYALSCLVAMKYQARLGMMVAGC  
YGLPQFRMRVFLWGALSSMVLPKYPLPTYDVVVRGNTPNAFSQCMAVAYDEKQKPHLKK  
ALLGDAISDLPKVENHQPKEVMEYGGSPKTEFQRYIRLSRKDMLDWSFGEEAGPDKGK  
LLDHQPLRLNNDYERVQQIPVKKGANFRDLKGVKVGANNIVEWDPEIERVKLSSGKPLV  
PDYAMSFYKGSLSKPFGRLLWDETVPVTVTRAEPHNQIILHPTQARVLTIRENARLQGFDP  
YYRLFGPIKEKYIQVGNAAVAVPVARALGYCLGQAYLGESEGSHPYQLPPSFTALGRTAVQ  
ARASPVGTPVGEVVEQ

>SbDNMT2

MEAPAPWRVLEFYSGIGGMRYSLMASGVRAEVVEAFDINDVANDVYEHNFGRPCQGN  
QTLTASDLKDYKAHAWLLSPPCQ  
PYTRQGLQKHSADARAFSFIKILNLMQDMSYPPQMLFVENVVGFEVSDTHDQLLEVLSSL  
NFNTQEFILSPLQFGVPYSRPRYFCLAKREPMRFRNASVN  
NKLLQTPMCLSMTLNSTSQGSDHQTEEELEPVCKPIKDFLVKEADGGTRNESVLQAYMVP  
VNLIERWGNAMDIVYPESKRCCCFTKSYRYVVKGTGSLA  
TSENIKWVPEEKLQVSSLKELGLRYFTPREVANFHSFPSSFYFPDHISLKQQYAMLGNSLSI  
AVVGPLLCLYFAEA\*

>SbCMT3b

MAPSSPSSAEPTRVSGRKRAAKAVEIHQSQEEEEEQKVVAASSAKRSRKAASSGKKPKPTP  
KQAKAGRKKKGAEERKEPVEDDVCAEEPDEEELAMGEAEAEAEAEADEQAMQEEVAAV  
AAGSPGKKRVGRRSAAAGGDHEPEFVGNAPPAVEARSNWPKRYERSTAATKPEEDEELK  
ARCHYRSKVDNVVYCLGDDVYVKAGENEADYIGRITEFFEGTDRCHYFTCHWFFRAE  
DTVINSLVSINVDGHMHDPRRVFLSEEKNDNVLDCHIISKVKIVRVDPNIDPKAKAQLIEHCD  
LYYDMSYSVAYSTFANISSENGQSGSETASGISDGDVDLETSSSMPERTATLLDLYSGCGGM  
STGLCLGAALSGLKLETRWAVDLNSFACQSLKYNHPQTEVRNEKADEFLLKEWAVLCE  
KYVQDIDSNLAGSEDQEDEGSPLDKDEFVVEKLIGICYGGSGRKNGIYFKVQWEGYGP  
DTWEPIDNLSDCPLKIREFVQEGHRRKILPLPGDVDVICGGPPCQGISGFNRFRNRDEPLKD  
EKNKQMVTFMDIVAYLKPKYVLMENVVDILKFADGYLGKYALSCLVAMKYQARLGMM  
VAGCYGLPQFRMRVFLWGALSSMVLPKYPLPTYDVVVRGGAPNAFSQCIVAYDETEKPSL  
KKALLGDAISDLPKVENHQPNDVMEYGGSPKTEFQRYIRLGRKDMLDWSFGEEAGPDE  
GKLLDHQPLRLNNDYERVQQIPVKKGANFRDLKGVKVGANNIVEWDPEIERVKLSSGK  
PLVPDYAMSFYKGSLSKPFGRLLWDETVPVTVTRAEPHNQAILHPTQARVLTIRENARLQ  
GFPDYYRLFGPIKEKYIQVGNAAVAVPVARALGYCLGQAYLGESEGSHPYQLPPSFTALGQ  
TAVQARASSVGTAGEVVEQ

>SbCMT1

MPIHSGPDSSSPVSPSCSPIPVALEERAPVVIPGSEPPLPLPVASSEAILEEGTLECTFNSVPS  
PPALPSSDRPDLGAEDGPNDWSSLLKVLSGSMPVIDMAATERPGDNAANCSMCMDSIATG  
DGTPLRSSPRIMAVKTKANAASLEHEIESSRASEHRLAVSRQISTSEGSQQPV SARLFEETT  
VASGKPVHLPDGVKPKQGSPIIDIYTSSTDVVVALPVVSKRSLKNKVVSITKANAASLEQ  
EIESSRASKHRLAVSQSTVSEGSQQPV SARLFEETT VSSGKPVHLPDGVKPKQGSPEIVAIH  
CSSTDVVVALPVVSKRSLKNKVSSSPRKTRSSSKVVVNSNRVSAVSQVMNCVPAVHKAS  
SSIPPRKHKLASEKCLPNLERVDAMLHNSGLISANKAVHGTPLEVEAALSQPPKAKQPRIC  
LGKCSLNLKSAENSSSSICELPMVTVTSAPEKPKISAPENKPLDTHCTDSEMVDSDMGSYF  
FVGDAVPDEEAQKRWPTRYQNNHCLLKKDKRSNTQTVSNVGVKAVLDVKCHYLEASICG

STLCIGDCAFIKGLEGKPHYIGRLLEFFETTADEYYFTVQWFFRAEDTVMEDQAQSHDPRR  
LFYSDLKDDNLLDCIVSKVTIMPVSPSLNEKPRLIPSFHYYYDMKYSLDYSTFSTMEMGDP  
NDTLHSHYTSSNNVKRIDFTEKQKSPTSEMRELSLLDLYCGCGGMSTGLCLGARGGGVN  
LVARWAVDGDDEVACETFRLNHPETVRVNETTDDFLELLKEWKKLCKTYVKPCSKVKSQS  
NVPTQSSNGTPDCSTFSTEEFEVWKLVDICFGDPNGVRKRALYFKVRWKGYPNDDTWE  
PMEGLKNCKDAIRDFVIEGHNKKILPLPGDVDVICGGPPCQGISGYNRNREFDAPFNCERN  
KQIIVFMDVMQFLKPKYIYMENVLDILKFADATLARYALSRLVSMHYQAKLGVMAAGCY  
GLPQFRMRVFLVGCHPKEKLPPFPLPTHEAIVKNGCPLAFERNLVGWPDSPMPQLEKPIVL  
EDALSDLPEVENGEKREEMLYMKGPQTEFQRYIRSFNSEVLGSRAHVIKVSLSKLFDRHP  
RALDVDNYLRVLQIPKKKGANFRDLPGVIVGPDNIARLDPTKERILLPSGNPLVVDCVLAY  
KNGKSLRPYGRLWWDEVVGTVLTCPNAHMQALIHQAQDRLLTIRESARLQGFPDSFRFRG  
TVKDRYRQIGNAVAVPVGRALGYALAMAYLNKTGDDPLMVLPPKFAFSDHVQGLSSVNG  
LHGRPIG

>SbMET1

MTHELSGDMVKTPRSPVTTGTRRCRAKPQKKEKESTENSKLENGSQDATEEVHHGVEKG  
DGHVTRKRPRRAAACSDFKESIRLSEKKSVMVMKKNRMEEEEIDAVSLTKLGPEDPPPC  
RKLIDFILHDAEGNPQPFEMSEIDDFITALIMPMDDDLERERGERGVRCEGFGRIEDWNISG  
YDEGTPVVWVSTDVADYECVKPATNYKSYFDHFYEKAQVCVEVFKKLAKSVGGNPNQG  
LDELLASVVR SINAMKGYSGNMSKDLVISIGEFVYNQLVGLDETSSNDDEKFATLPVLLSL  
RDQCRSRVELTKLPSNISNTSLKIKDTVCEGTAEEDDDAKLARLLQEEEEWKMMKKQR  
GRRGTPSQKNVYIKISEAEIANDYPLPAYYKPFSSQEMDEYIFDSDDSFSDVPVRILNNWT  
LYNADSRILSLELIPMKSGAENDVVVFGSGFMRDDDGSCCSTAESVKSSSSSSKADQQDA  
GVPIYLSPIKEWLIIEFGGSMICITIRTDVAWYKLRQPTKQYAPWCEPVLKTARLAVSIITLLK  
EQSRASKLSFADVIKKVAEFDKGNPAFISSNIALVERYIVVHGQIILQQFADFPDETIRRSFAFV  
SGLLLKMEQRRHTKLVMKKKTQVMRGENLNPSAAMGPASRRKAMRATTTRLINRIWSD  
YYAHHPEDSKEGDGNEAKEVDDEQEENEDEDAEDEGQIEEDKISKTPPSTRSRKLLSQTC  
KEIRWEGETSGKTSSGETLYKCAVRELRIPVGGTVVLEDDSGDTVMCFVEYMFQKSGG  
AKMVHGRILQKSHTILDNAANEREVFLTNDCLEFKLDDIKELVSVDIQSRPWGHKYRKE  
NSETDKVEQAKAEERKKKGLPMVYFCKSLYWPEKGAFALPRDKMGLGSGVCSSCEHIE  
PDSDELKVLSTSFVYRKVTYNVNDFLYIRPDFSEDEDRATFKAGRNVGLKPYAVCQILA  
IPEGAGSKKLN PASANISARRFYRPDDISTAKAYASDIREVYYSEDVIDVPVDMIEGKCEVR  
KKNDLASSDLPMFEHVFFCELIYDRASGALKQLPPNVRFMSMVQKATIASKKNKGKQIC  
ETDQIDSGKWLDVPKENRLATLDIFAGCGGLSEGLQQAGVSFTKWAIEYEYPAGEAFSKN  
HPEAVVFVDNCNVILKAIMDKCGDTDDCISTSEAAEQAAKLPELNINNLVPVGEVEFINGG  
PPCQGFSGMNRFNQSPWSKVQCEMILAFLSFAEYFRPRFFLLENVRNFVSFNKGQTFRLAV  
ASLLEMGYQVRFGILEAGAFGVAQSRKRAFIWAAAPGEMLPDWPEPMHVFASPELKITLP  
DGQYAAARSTAGGAPFRAITVRDTIGDLPKVENGASKLTLEYGGEPVSWFQKKIRGNM  
MVLNDHISKEMNELNLIRCQHIPKRPGCDWHDLPDEKVKLSNGQMADLIPWCLPNTAKR  
HNQWKGLYGRLDWEGNFPTSVTDPQPMGKVGMCFHDPDQDRIITVRECARSQGFPDSYEF  
AGNIQNKHRQIGNAVPPPLAYALGRKLKEAVDNKRQEAGVGVPAP

>SbMET2

MTHELSGDMVKTPRSPVTTGTRRCRAKPQKKEKESTENSKLENGSQDATEEVHHGVEKG

DGHVTRKRPRRAAACSDFKESIRLSEKKSVMVKKNRMEEEEIDAVSLTKLGPEDPPPC  
RKLIDFILHDAEGNPQPFEMSEIDDFITALIMPDDDDLEKERERGVRCCEGFGRIEDWNISG  
YDEGTPVWVSTDVADYECVKPATNYKSYFDHFYEKAQVCVEVFKKLAKSVGGNPNQG  
LDELLASVVR SINAMKGYSGNMSKDLVISIGEFVYNQLVGLDETSSNDDEKFATLPVLLSL  
RDQCRSRVELTKLPSNISNTSLKIKDTVCEGTAEEDDDAKLARLLQQEEEWKMMKKQR  
GRRGTPSQKNVYIKISEAEIANDYPLPAYYKPFSEQEMDEYIFDSDDSFSDVPVRILNNWT  
LYNADSRILSLELIPMKSGAENDVVVFGSGFMRDDDGSCCSTAESVKSSSSSSSKADQQDA  
GVPIYLSPIKEWLIEFGGSMICITIRTDVAWYKLRQPTKQYAPWCEPVLKTARLAVSIITLLK  
EQSRASKLSFADVIKKVAEFDKGNPAFISSNIALVERYIVVHGQIILQQFADFPDETIRRSFAFV  
SGLLLKMEQRRHTKLVMMKKKTQVMRGENLNPSAAMGPASRRKAMRATTRLINRIWSD  
YYAHHPEDSKEGDGNEAKEVDDEQEENEDEDAEDEGQIEEDKISKTPPSTRSRKLLSQT  
KEIRWEGETSGKTSSGETLYKAYVREL RIPVGGTVVLEDDSGDTVMCFVEYMFQKSGG  
AKMVHGRILQKGSHTILDNAANEREVFLTNDCLEFKLDDIKELVSVDIQSRPWGHKYRKE  
NSETDKVEQAKAEERKKKGLPMVYFCKSLYWPEKGAFALPRDKMGLGSGVCSSCEHIE  
PDSDELKVLSKTSFVYRKVTYNVNDFLYIRPDFSEDEDRAFKAAGRVGLKPYAVCQILA  
IPEGAGSKKLN PASANISARRFYRPDDISTAKAYASDIREVYSEDVIDVPVDMIEGKCEVR  
KKNDLASSDLPVMFEHVFFCELIYDRASGALKQLPPNVRFMSMVQKATIASKKNKGKQIC  
ETDQIDSGKWLDVPKENRLATLDIFAGCGGLSEGLQQAGVSFTKWAIEYEYPAGEAFSKN  
HPEAVFVDN CNVILKAIMDKCGDTDDCISTSEAAEQAAKLPELNINNLVPGEVEFINGG  
PPCQGFSGMNRFNQSPWSKVQCEMILAFLSFAEYFRPRFFLLENVRNFVSFNKGQTFRLAV  
ASLLEMGYQVRFGILEAGAFGVAQSRKRAFIWAAAPGEMPLPDWPEPMHVFASPELKITLP  
DGQYAAARSTAGGAPFRAITVRDTIGDLPKVENGASKLTLEYGGEPVSWFQKKIRGNM  
MVLNDHISKEMNELNLIRCQHIPKRP GCDWHDLPDEKVKLSNGQMADLIPWCLPNTAKR  
HNQWKGLYGRLDWEGNFPTSVTDPPQPMGKVGMC FHPDQDRIITVRECARSQGFPSYEF  
AGNIQNKHRQIGNAVPPPLAYALGRKLKEAVDNKRQEAGVGVPAP

>SbDRM3

MQVKIEDHAEDGGIDADVRLGEEAAVDPLPGSVHATFKEEEGEPSSSSGKLRSEFIGMGFS  
SKLVDKVLQRHGDDDSNTILESLLSYSDLKQSGSESSGSLGSLFSDNEENNSSLESRKVIN  
QDIKPELDSFSEKWSFLLRTMNFSSQEVDLAFKQLGDEAPLEQLVDFIVNAQSGVSSGGPE  
NGDATNEGKTELLYGVMETLSLLQMGFTEEEVSSVLENSDQRATIQELADSILARRIANS  
IEQKEVKIESDFLGEAEPDYSSYQPSYSAASYDDDNNNIRVKRAKHVFIDDTGASSSHLG  
NPWSMGTSMDPVKVELEAMTPGRRANVQGD LAKPPFFLYGNMVDIPKDTWYQLTQFLY  
NVEPEFVNSQSFSALTRKEGYIHNL PVEKRRVVVPKSPMTIEEALPFTRQWWPSWDTRKHI  
SVVTIEVGEIEQT CERLGSMVRESRGLSEARQMQUIHQC RVSNLIWVGQNKLGPLEPRQV  
ERILGYPHNHTNLFELNQSDRFGAMKFAFQTDLSYFLSVLKGMYPDGIRVLSIYSGIGGA  
EVTLHRLGIPLKCVISVEESEVNRKILRRWWSKTEQTGVLRQHPIGWKLKTHVIEDLVKEF  
GGFDLIIGGNYTSCKGGNTVNTTMGLDSNRFYEYARVVKRVRTAVGLS

>SbDRM1

MADRVGGSDDGDKSEWNSDGEVARSLDGAGSPIAPSRNKLKDAPGPSLLVNGAGPSASL  
VEDFVGMGLIKNGDGGAESLLELLLAYKAIGNDPSLDKSSASVCGPRTICDDKDILANW  
DAHDASTSSDRDHASDDSGDEDFLQGLSQKDEKIESLVRMGFPKDEAEMAIVRCGQDAP  
MSVLIDLIYSSEASEDGYYGNFSGHEDDSFGGRKEKRKRSEDAEQGSSHDEPMPLPNPMV

GFNLPNVSLRSVDRSLPSKAIGPPFFYYENVAIAPKGVWTTISQFLYDIQPEFVDSRFLCAA  
ARKRGYVHNLPENRSPLLPLPKTIFEAFPHTKKWWPSWDPRKQFNCLLTSMAPKPLTE  
QIHHALAKCKDPPRRVQKYVLETCRTANLVWVGLNKVAHLEPDEMEFLLGFPKDHTRGI  
GRPERFKSLGNSFHVDTVAYHLSALRDMFPHGMNVLSLFSGIGGAEVALHRLDIRMKTVV  
SVEISETNRFVLRTWWNQTTGTGLIEITDVQSLTTERLESCIRRIGGFDLVIGGSPC>NNLAGR  
NRFHRDGLEGEQSSLFYHYRILDTVKSIMGRM

>SbDRM2A

MAHWVSDGDGSDSFEWSDSDGNNGEEAGSFNTAGASSSAMASTNTDAPGPSRRVSQVANG  
NGKAGPSASLVQRYIDMGFAEEIVVKAIKDNGDNGADALVELLLTYQELGNDLNVDNGF  
ASGCVPTVDDSGDDDFLENWDDLADAGGRSTRVANSVDDSGDEDFLEHMSQKDNKIDS  
LVKMGFPEDEAALAITRCGQDASISVLADSIYASQTAGDGYCGNLSDYEDGGRNKGRFM  
DGNNKKRKRYGSQALGSRGPLDGSADEPMLLPNPMVGFSLPDQWPRPVNRDLPALAMG  
PPYFYYENVALAPKGVWTIISFLYDIQPEFVDSKYFCAAARKRGYIHNLPENRSPLLKP  
PRTITVAFPHTKRWWPSWDPRQQFNCLQTCVSSAKLLEKIRVTLTNSSDPPPPRVQKLVLEE  
CRKWNLAWVGLNKVAPLEPDEMEFLLGFPKDHTRGICRTERFRSLGNSFQVDTVAYHLSV  
LKDMYPEGMNVLSLFSGIGGAEVALHRLGIRMKTVISVEKSEVNRTILRSWWDQTTGT  
LIEINDVQTLT SERIEAYIRRFGGFDLVIGGSPC>NNLAGSNRHHRNGLEGEHSSLFFQYVRILE  
SVKSIQRL

>SbDRM2b

MAHCVGSDGSDNFEWSDSDGDGEEAASFNAAGASSSAMASTNADAPGPSTRVANGNGK  
AGPSASLVHKYMDMGFPPEEIVLKAMKDNGDNGADSLVELLLTYQELGNDLKVDNGFAS  
GCVPNVDDSDDDDILENWDDEDAGGRSTGVANSVDDSGDEDFLEHMSQTDEKVYSLV  
KMGFPEDEAALAVTRCGQDASISVLVDSIYASQTAGDVYCGNLSDYEDNSYGGRNKGRF  
MDANKKRRKRYEGQAHGSRGPLDGSSDEPMLPHPMVGFSLPHQCTRVPVDRSLPSQAM  
GPPYFYYENVALAPKGVWTTISFLYDIQPEFVDSKYFCAAARKRGYIHNLPENRSPLLPI  
PPKKISEAFPHTKRWWPSWDPRRQFNCLQTCVSSAKLLERIRVALTNSSDPPPPRVQKFVL  
EECRKWNLAWVGLNKVAPLEPDEMEFLLGFPKDHTRGISRRERYRSLGNSFQVDTVAYHL  
SVLKDMYPQGMNVLSLFSGIGGAEVALHRLGIRMKTVISVEKSEVNRTILKSWWDQTT  
GLLIEICDVQTLT SERIEAYVRRIGGFDLVIGGSPC>NNLTGSNRYHRDGLEGEHSSLFYHYV  
RILDSVKSIMERL

>BdCMT3

MAPSSPSSAAAAAPARASSRKRTASAKAELAQEATKRPRKAAASSGKKKVTKPKAKAEK  
APRKKKEVEVLGEDEVCAEEPDEEELALGEEDESAASGEQQPEEPAAARKRVAQPIRARN  
QAGGDKDHGFVGAPFPAGEARSKWPQRYQPTKPRRPEEEEEEDPKARCHYRSAKVDEAIY  
NLGDDVYVMAGENEPHYIGRITEFFEGIDKKCYFTCRWFFRPEDTVISTAKFVNDHHTDP  
KRVFLSEEKNDNVLECIVLKVNIVHVDPNMDSEAKAQLVAESDLYYDMSYSVAYSTFANI  
TSDTNDNSGISSVDSEAAASPVRTAVLLDLYSGCGGMSTGLCLGSALAGLKLETRWAVDL  
NSFACKSLKYNHPGTEVRNEKAEDFLALLKEWAILCDTYVHGNNSDPASPEDEEEDDEP  
LGKDEFVVEKLLLEICYGGSGREKAIYFKVQWKGYGPEEDTWEPIGNLSDCPLKIKEFVQE  
GHKRNLPLPGDVEVICGGPPCQGISGFNRFRNRKEPLKDEKNQMQMVTFMDIVSYLKPKF  
VLMENVVDILKFADGYLGRYALSRLVSLNYQARLGIMVAGCYGLPQFRMRVFLWGALPA

MVLPKYPLPTHDVVVRGGAPNAFSQSIVAYDETQKPTLKKALLLGDAISDLPKVDNFQPH  
EVMEYGAQPKTEFQSYIRLSRKDMLDYSFGDNTCPEEGKLLDHQPLRLNQDDYDRVQQI  
PVKKGANFRDLPGVKVGANNIVEWDPEVQRVYLKSGKPLVPDYAMSFYIKGRSLKPFGRRL  
WVDETVPVTVTRAEPHNQIILHPNQARVLTVRENARLQGFDPDYRMNGPIKEKYIQVGN  
AVAVPVARALGYSLGRAYQGEMEGSNPLFTLPDSFTNVGQTVVLARASSVGTPAGEVVEQ  
>BdDNMT2

METPPPWRVLEFYSGIGGMRYSLTASGVQAEVVEAFDINDVANDVYEHNFGHRPCQGNIQ  
TLTASDLDKYKAHAWLLSPPCQPYTR  
QGLQKHSADARAFSFIKILNLSNMRFPPQVLFVENVVGFEVSDTHDQLLEVLISILNFNTQ  
EFILSPLQFGVPYSRPRYFCLAKQESMCFQNASANKLL  
WTPTCLKFNSTTQNSYDQNEDELEIACRSIKDFLETQSINIGDQDCSGTISACNLKEADGCT  
PSETVSQDYIVPLNLIERWGNAMDIVYPESKRCCCFTK  
SYYRYVKGTGSLLATSKNLKPIPKENLEISSNLRLRFFTPREANLHSPSSFCFPDHISLR  
QQYAMLGNSLSVAVVAPLLHYLFSEK\*

>BdCMT3b

MAPSSPPSAALRASSRKRTASAKAAPDQEPSAATKRPRKGAASSSAKKKTADPKAKALKA  
PRKKKEVAAAEEKLSEDEVCAEEPDEEELELGEEDESAASGEQGQATARRRVAQPTRERN  
LAAGDKEPEFVGEPFPADEARSKWSQRYQRAAPRRPDEEPELKARCHYRSANVDGTVYA  
LGDDVYVKAENEADYIGRITEFFEGTDRHCYFACRWFFRPEDTVISTAKFVDDHTHDPK  
RVFLSEETNDNVLDCCIKKVKIHHVDPNMDPEGKAQLVADSEAELYDMSYAVAYSTFANIP  
SDTNENSGISSDADLEAGTPPVRTAALLDLYSGCGGMSTGLCLGAALAGLKLETRWAVDL  
NSFACKSLKYNHPGTEVRNEKAEFLALLKEWAILCDTYVHVNNSESDSPIEDEEEDDEPL  
AKDEFVVEKLLEICYGSGRKGKIYFKVQWKGYGPEEDTWEPIGNLSDCQLKIKEFVQEG  
HKRKILPLPGDVDVICGGPPCQGISGFNRFRNRKEPLKDEKNQQMVTFMDIVSYLKPKFV  
LMENVVDILKFADGYLGRYALSRLVALNYQARLGMMVAGCYGLPQFRMRVFLWGALPD  
MVLPKYPLPTYDVVVRGIVPNAFSQSVVAYDETQKPTLKKALLLGDAISDLPEVDNYQLH  
EVMEYGTKPKTEFQRYIRLGRKDMLDHSFGDNTCPEEGKLLDHQPLRLNQDDYDRVQQI  
PVKKGANFRDLPGIKVGANNIVEWDPEVPRVYLKSGKPLVPDYAMSFYIKGRSLKPFGRRLW  
WDETVPVTVTRAEPHNQIILHPNQARVLSVRENARLQGFDPDYRMNGPIKEKYIQVGNV  
AVPVARALGYSLGQAYQGEMESTGPLFTLPASFTNVGQTEELARASSVGIPVGEVVEQ

>BdCMT1

METPPHNPIPPSPPPVTDGSPAPYAGADGDEAAGGFDGSLESMLERIFGPPELEPWSPPRE  
FDFAAEFAAVAATDPDPLEDLGGGPWDAAPWMSTGLVACEGAAATTRAPSPPTAAPGFAP  
APTPAFDSSEGAPEVRSLDHLDNYSMPESPSTPVAVDMREKLVFVSDSAPVLESSPSPVA  
CPDLSTTEPMKETTNAAPERSDLPLPNRVEQSTSSLSNQVVLALQTPQVVREMPQEVEGK  
SSRPLKAKRVRGSTDKCLPNLKRAKKNSGSIGRLPNVTTMPDPGNTHEVILDKHLTDSEM  
VESDDGSCFFVGEAVLEEEAKQRWPHRYKKNHHFVEKFLSLKDKRSGNQPFANAGNDVL  
DVKCHYLQASVSGSTLCVGDCAFVKGPEGRPNYISRILEFFETVAGECYCRVQWFFRAED  
TVMEDQAQSNDRPLFYSDLQDDYSLDCIVSKLTIVQVPPCVDKESKSIPSSQYYYDMKY  
SLDYSTFSTLEMEDTNAILQSSHASSIEMKKVDFSKKQKSPVPNKKDLSLDLGYCGCGGM  
STGLCLGAHGAGVNLVKKWAVDDDLVACESYRLNHPETRVNRNETTNDFLLLLKEWQKLC  
KKYVEQSEVKDHADGLTETINEIPDDSDVPTEEELEVWKLVDICFGDPNGIENHCLHFKVR  
WKGYGRNDDTWEPIDGLGNCNEAIRDFVIEGHKRKILPLPGDVDVVCGGPPCQGISGYNR

NREFDAQFKCEENKEIIFMDVMQFLKPKYVYMENVLDILKFADATLARYALSRLVAMRY  
QAKLGIMAAGCYGVPQFRMRVFLLGCHPEEKLPPFPLPTHEAIRKNGCPLAFERNLVGWS  
DGTTVQLAKPIVLEDILSDLPEVGNEESRDEMPYVKDPQTEFQRYIRAFNSEVRGPKSRAA  
KSKSRKAKPKLYDHRPFVLDNDNYLRVLQIPKKKGANFRDLPGVVVGPDNVAKLDPTKE  
RILLPSGNPLVLDCILKYEDGKSLRPFGRLLWWDEVVGTVVTCPNAHTQAFIHPAQDRLLTI  
RESARLQGFPSYRFHGEVKERYCQIENAVAVPVGRALGYALAMAYLNKTGSDPLMVLPP  
KFAFSQNIETL

>BdMET1

MVKTSPRSPVTTGTKRCRAKPQKKKEESTGEGQLETEPKDSAEVMHNEVENGAGSAAR  
KRPRRAACSDFKESVRLSEKSNVVMIKKNRMEEEEIDAINLTKLGPEDSPPCRKLIDFIL  
HDADGNLQPFEMSEIDFFITALIMPVDDDLEKERERGVRCEGFGRIEDWAISGYDEGTAV  
VWLSTELADYECVKPASNYRSYYSHFYKAQVCVEVYRKLMRSVGGNPNLSLEELLATV  
VRSINAIQGYSGTMSKDFVIATGEFVYNQLIGLDQTAGNDDEKLATLPVLLALRDECKSRV  
EFNKMPPKISNGSLKINDAECNEVAEDDDEKLARLLQEEEEWKMMKKQRGKRGVPAQK  
NVYIKISEAEIANDYPLPAYYKPSTQEMDEYIFDGGDDGMFSDDPVRILNNWVLYNADSR  
LISLELIPMKSGTENDIVIFGSGFMRDDDGGSCSTAESANSSSSSSKAHQDAGVPIYLSPIK  
EWLIEFGGSMICITIRTDVAWYKLRQPIKQYAPWCEPVLKTARLAVSIITLLKEQSRASKLSF  
VDVIKKVAEFDKGDPAFISSNISLVERYIVVHGQIILQQFADFPDETIRRSATFATGLLMKMEQ  
RRHTKLFMKKKAQVTRGENLNPIATMTGTSSKRKAMRATTTRLINRIWSDYYAHHFPEDSK  
DGDENEAKEIDDEQEENEDEDAEEEVQIEEEKVSETPPSTRSRKLVSQTSKEIRWEGKSTG  
KTASGEALYKCGYARELRIAVGGTVTLEDDSGEIVICFVEYMFQKPDGEKMHGRMLQK  
GSETVLGNAANERELFLTNDCLEFELKDIKELVSVNLQSMPWGHKYRKENSEADKIERAR  
VEERKKKGLPMEYLCRSLYWPEKGAFSLPHDKLGLGNGVCSSCEHREPERDELRLSKT  
SFIYRKVTYSVHDFLYIRPEFFSQEEDRGTYKAGRNIGLKPYPVCHLLDVCEPVGSKKINPA  
SAKVSVRRFYRPDDI

SSDKAYTSDIREVYYSEDIINVPVDMIEGKCDVRKKIDISNSDLPMVEHVFFCEHIYDPMT  
GALKQLPPNVKLTSMVQKAAGALKKNKGKQICENDQVSDKRKEVPKENRISTLDIFAG  
CGGLSEGLQQAGASFTKWAIEYEPPAGEAFRQNHPEAAVFDNCNVILKAIMDKCGDAS  
DCVSTSEAAEQAAKLAEENIKNLVPGEVEFINGPPCQGFSGMNRFNQSPWSKVQCEMI  
LAFLSFAEYFRPRFFLLENVRNFVSFNKGQTFRLAVASLLEMGYQVRFGILEAGTFGVAQS  
RKRAFIWAAAPGEILPDWPEPMHVFASPELKITLPDGKYAAAKSTAGGAPFRAITVRDTI  
GDLPKVENGANKLILEYGGEPTSWFQKKIRGSTIALNDHISKEMNELNLIRCKHIPKRP GC  
DWHDLPEDEKVKLSSGQMVLDLIPWCLPNTAKRHNQWKGLYGRLDWEGNFPTSVTDPQPM  
GKVGMCFHPDQDRIITVRECARSQGFPSYQFAGTIQSKHRQIGNAVPPPLAFALGRKLKE  
AVDAKRQQA

>BdMET2

MEKVPHTAVTTGKRRRAKPREMADESIEDDRLETEFANDKKESNGATENGDRPIAHKRR  
KRAAACSNFKEKAFDLSEDDSLVAIKESRVEEEIGAVRLTKTGPEDKKSCRKLIDFILHDEN  
GNAQPFEMSHSDGISITALVMPLDDNMEKDREKGIRCLRFGPIKNWAISGYKQGTAAIWLS  
TELADYKCVKPASGYRSYFDHFSRKADVCEVYKKLARSVGGNLQLGLEELLASVVR SI  
NSNRSFNGTVNKDFVISIGEFIYNQLSGLDNTSDKDDETLSELPVLVALRNECTSRIEFNKL  
PGMTSSETLKIKGQCKEEVTRNEDEDEKLARLLHEEEEWKLMKQRSKRQASKKNVYIK



ISETEIANDYPLPAYYPYSLEMDEYMFDSMDGMFSDDVPVRILNNWALYNDSRLISLEL  
IPMKSGAENDIVIFGSGFMREDDGSFFSTAEPQLSSSSSKSDQEDQGVPIYLSPIKEWVIEF  
GGSMICISIRTDIAWYKLHQPLKQYAPWCDTVLTARLAVSVITLLKGQSRASKLGFADVI  
KKVAEFESGHPAFISSNATLVERYVVVHGQIILQQFANYPDPSIRRSFVTLTAKMEDRRH  
IKLVMKKKSQPTRGENLNPSANIGPIIRKLMRATTTTLISKIWGDYYATHFPEDSKEGAED  
EPKEIEEEEQEENEEDAEEVVKVEEEHVLSTPPSARSRKSSSNCKEIEWEGQTVGKTRSGD  
DLYKCARVRELNISVGGAVKLEDDSEDALMCFVEYMYEKQDGTHMIHGRILQKGSQTVL  
GNAANEQEVFTNDCLEFEIGDIKELVSVNVQLIPRGHKYRKENLQANRIERAKAEERKK  
KGLPMEYICKSLYCPEKGAFSLPYDKLGTGTGICSSCQREAVGDEFKILSETTFVKNST  
YAVHDFLYVRPEFFSRVDGHETYKAGRNVGLKPYVVCHLHSINAPAGSKKVNPESTKVS  
RRLYRPDDISSARAYSSDIREVYYSEDMLSVPVAMIEGKCEVTTKNNLPDSNLPVVVDHVF  
YCEYLYDPDTGALKQLQSNVKLMTIARKAPTSKKNKGKQICSDQAGSDKQKAAASENS  
LATLDIFAGCGGLSEGLQLSGASHTKWAIEYEPAQAFGENHPEAAVFVENCNVILKAIM  
DKCDDTDDCISTSEASEQAAKLSDEKIKNLPVPGEVEFINGGPPCQGFSGMNRNFNQSPWS  
KVQCEMILAFLSFAEYFRPRFFLENVRNFVSFNKGQTFRLTLASLEMGYQVRFGILEAGA  
YGVAQSRKRAFIWAAAPGETLPDWPEPMHVFASPELKITLPDGKYAAAKSTAGGAPFRSI  
TVRDTIGDLPPVENGASKPTIQYGSEPISWFQKKIRGVDVLSLNDQISKEMNELNLIRCKHIP  
KRP GCDWHDLPDEKVKLSSGQMVELIPWCLPNTAKRHNQWKGLYGRLDWEGNFPTSVT  
DPQPMGKVGMCFHPDQDRIITVRECARSQGFLDGYRFAGNIQSKHRQIGNAVPPPLAYAL  
GRKLKQAINARN

>BdDRM1

MVDLISDSDDSVAFEWESDGDAPSSAPVLRDFDAPGPSTLVRQDTNGRPNGEALPASLVE  
EYVGMGFPKDMVLKAIKQIGNLSSNNFHFICLVLFAPCVSTDSFAFRSRDANSLVELLLTY  
KVLAESDASVGNPSSSGCAPHSVENDDDDNLDSEDWDDDDSDGSSDEDFLQEMSKED  
DKAKSLVDMGFPVEEAKMAITRCGADAASIVLVDSIYASQAADSGNVFDHEVSDRSFRSF  
GERKRAISIEGSKKKAKRYGGGAQGNRTPLDGSDDEMPLPNPMNRRPLVLATAPFFYYE  
NVARAPKGEWREMSRNLDIHPEFVDSVHLCAAARKRGYIHNLPVNRSPILPLPPKTILEA  
FPHYSKWWPSWDSRKKLNCLQTSGASAKLTERIQTLANSTNPPPHVQKYVLNQCKRW  
NLVWVGKKNKVAPLEPHEVEYLLGFPKDHTRGICKKEREKSLGNSFQVDTVAYHLSVLRD  
KFPNGMNVLSLFIGIGGAEVALHRLGIRLKTVVSVEISPANRRILKGWWDQTQTGTLIEIED  
VKTLKSDTIASFVSKYGGFDLVIGGSPCNNLAGSNRHHRVGLEGEHSSLFYHYPRILGDVK  
RAMDGR

>BdDRM2

MDCISDSDDSAKFEWESDNEAEPSSAPVLRNFDAPGPSTDANGWANGDAPSTSLVEEYVG  
MGFPKEMVLKAIKEIGHNDANALLELLLLTYKVLGEDPTVGNCSTLGCAPQSVEDDDGD  
LDSEDWDEDDADGGEPNFDSSGDEDFLQEMSEHDKKIKSLVDMGFPEDESNMAIVRCG  
VDAALTVLVDSIYASQAAGDCNSRNSSHHEVCDSFGGRRNKKKRKQYGGGAQGNRPSEC  
HEELMPLPNPMVGFSLPTARLPSVSRRLPKQATGPPFFYYENVALAPKGVWTIISRNLYDIA  
PEFVDSKYM CATARKRGYVHNLPNIENRSPLLPLPPKTIFEAFPHYKKWWPSWDPRRQLNC  
VQTCVSSAKLTERIQCALARSGDPPPLHVQKYVMHECRKWNLVWVGKKNKVAPLEPDEM  
EYLLGYPRDHTRGIGKTARYKCLGNSFQVDTVAYHLSVLRDIFPNGLNVLSLFTGIGGGEV  
ALHRLGIHMKTVVSVEISEVNRRILRGWWDQTQTGTLIEIPDVQSFTSDKIRSFIRRFGGFD

LIIGGSPCNNLAGSNRHHRDGLEGEHSSLFYHYPRILDTVKDVMAGM

>BdDRM3

MARTKRPAKRKPKGAANLKLVPNSRHCGSSSRFMEYAALEADLIKMVKTEDQDEDEGV  
ASVGALRDGTVDPQPDTAHAGVKAEDGQPSSSSSYSKFIGMGFPPTLVDKMLQKHGDK  
DFNAILESLLFHSSLTKSGSESSSSSLGSLFSDSEENISRLGSMKEPHEEIKPEPDSFSERRSY  
LLSAMNFSQQEVDWAFNQLGEEAPLDQLVDTIVTAQVAGFTGGNENVDATTEGKAESLF  
GVMEKTLHLLQMGFTEEEVSGAIDSSGQEATVQELADSIFARRIDNSIKQTEVKIESDFLGG  
TENQHSTCHQRLRYDDEDDKIGVKRAKSIFTDNSSGASSSRPGNQPSLTPWLSGCTGSVS  
NGYVKEEFDAMASGPRPDVRPEIAKPPYFLYGNVVDIPKGTWHQLSDFLFNVEPEFLNSQ  
YFSAVMRREGYLHNLPMETRHIVVPKSPMTIEDALPFTRQWWPSWDTRKHIGVVTLDVA  
EIEQMCEKLGKIMTDSRGVLSHEKQAHIMQQCKMSNLIWIGKDRLSPLEPHQLEHILGYP  
RNHTEQFELNTPDRLAAMKYTFQTDVLAYLLSVLKSYPNGLRLLSIYSGLGGAEVALDR  
LGIPIKCIVSVEESDVNRKILRKWWRRTNQAGELRQFVGIWKLKTIVLEDLVKEFGGFDLII  
GGNYSSCRGGRTINATMGMDSNKFYEYARVVKIVRALHNS

>RcCMT1

MGRSAKRPNREPEVEEEDGATLSDQKGPITLLSARPKETKKAKLDADLSFIGNPISATEAR  
KKWPQRYKSQISKVKNSEPPQNGVLSKDDDDVTQAKCHYKQAMVDGILYDLGDDAYVK  
AEDGKPDYIARIVEMFESIDGEPLFTAQWFYRAEDTVIKDYVKTAESRRVFLSEIRDDNPL  
DCIVSKVKIALVEPNLDLAEKERNLPPCDLYYDMKYTLPLTYETIKTDDSGRDSGSSSTIS  
SENDSNNSIDDVKVTTAKPLKVLSKVHSSEKSELYLLDLYSGCGAMSTGLCMGASLSGVK  
LVTKWAVDINAFACKSLKTNHPETEVRNEAAEDFLSLLKEWEKLCRKFSLFGSEKHPEQSS  
NSASDEEEEDEEEEEEEEKGDKDDDDDEIFEVEKLLAVCYGDPNKVNKRGLYFKVRWKG  
YGPSEDWEPIEGLSDCKDKLKEFVTKGFRSKILPLPGDADFICGGPPCQGISGFNRFRNTK  
APLDDPKNHQMVMVYMDIVEYLKPKYVLMENVVDILRFAGGFLVRYALGRLISMNYQARL  
GMMMAAGSYGLPQFRMRVFMWGSQPSESLPQYPLPTHEVVVKGGIPNEFEETVAYNKLDP  
CQLEKALYLGDAILDLPVNNDDESQDERKYGTTPQSDFQKYIRLKKSDVVGATDKNASH  
PQMLYDHRPLKLNDDDYQRVCRVPKKKGANFRDFPGVLVGTDNKVEWDPAVERVLLPSG  
KPLVPDYAMSFVRGTSCPKFGRLWWDET VATVVTAEAPHNQIVHPMQDRVLSIRENARL  
QGFPDCYQLHGPVKERYTQVGNAVAVPVATALGYSFGIASQGFSDNKPLTTLPFKYPNCLQ  
KSS

>RcMET1

MVSMREVSESKEAPFSDNNKKTGAAEDTSNIQESKPENGGAASKVKLKRGLSKNENV  
YSSRKMTKRAAACSDFKKPLDFSEEYSFTEIKKEVIVEHEAVALGLTAGRDDLRPNRRLK  
DFIFHDAYGNIQAVEMLEFFDLFISGLIVPLEESSDKDKEKGIRCNGFGRVESWAISGYEES  
PVIWVSTDMAVDYDCIKPANRYKKLYNLFFEKAHACVEVYRKLSRMHGGDPNISFDELIAG  
VVRAMSGSKNFPQGMSIKDFIISQGEFIYNQLIGLDATSKKNDQMLTGLPVLLAMRDEKK  
KREGLFMHEATTTGRTVNRNLTIDGKLTNQLSSSLAEEDDMKLASLRQEVENWLSMK  
QNKRRFSVPSSHFIKINEDEIVNDYPWPTYKYKTSAAEIDEFLVICDDEIFNPPENVLHNWT  
LYNSDARLISLELLPMRYCADADMTIFASGIVTKDGDLSGRYLDVNSDLPSSASSDVQDVG  
LPIYTSIAKEWKIEFGSSMIFISLRTDLSWYRLGKPSKQYAPWYKPVVKTARLAISIITLLQE  
QRRVSRLSFADVIQRVSKFNEGHHAFISSLAEVERYVVVHGGQILQLFSEFPVKAIQNCPF

VTDLHSMQQINHLKLRVKEKRVLKKGLNLNPREAVATISERKAMAATTTKLINRIWGDY  
YSNYSPEESNGADGLEIKEDDEVVEEQEESEEDSEEIEEQKMEIEKKSEKTRSTEKLNTW  
QCSNQEIRWVGGLGKSCTGKAFYKKAFFVHGGIVAVGDFVMLGTTDADQLSPIYFVEYM  
FENSDMRKMAHGKLMLYGSQTVLGNTANKRELFLANDCLEFELSDVKQNVVVEFKLTP  
WGYRHRKASIIKDRTDRERTEERRCKGLPMEYFCKSQYLPERGAFICLSKDTMGLGNGVC  
HCKTKEIQMGKESFRLNLSSDSFVYKGTEYCIHDYVYRAPHHFTVDVMDLQTFKGGRN  
VRLRPYVVCQLLEIQVGKGLLQVTPESILVKVRRFFRSEDISAENAYCSDIREVYYSEHIET  
FPILDIQGKCEVRKKHDLPSFDKLAIFEHIFCEHIYDPEKGTIKQLPAHIKLSSSKERMNDD  
ILYRKKKGKCKEGENDFDDNVKRSEALSRNQLATLDIFAGCGGLSEGLERAGISVTKWAIE  
YEEPAGEAFKQNHPEALMLINNCNVILRAIMSACGDADDCICTSEASELAEKLDEKEISNF  
PRPGEVEFINGGPPCQGFGSMNRFNQRSWSKVQCEMILAFLSFADYFRPKFFLENNVRNFV  
SFNKGNTFRLTLASLLEMGYQVRFGVLEAGAFGISQSRKRAFIWAASPEEILPEWPEPMHV  
FAGPELKIKLSGNSQYAAVRSTANGAPFRAITVRDITIGDLPVGNNGASLTMMQYKNEPVSW  
FQKTIRGDALVLTDHISKEMNELNLIRCKRIPKHPGADWRDLDPKKVKLSNGQLVDLVPW  
CLPNTAKRHNQWKGLFGRLDWEGNFPTSVTDPQPMGKVGMCFHPEQDRILTVRECARSQ  
GFADSYQFLGNIQKQHRQIGNAVPPPLAFALGRKLKEAVEMKRSLSVRCLCNCTAIVVQ  
NSLPSTYP

>RcCMT2

MNKFYGNLHYDQLLQGEQGQKHVGRIVEFFKTTDGEDYFRVQWFYRAEDTVIKEEAG  
FHDKKRLFYSTIMNDNPIDCIISKVRIVQLPSMIGSKSSIRSTDFYFDMEYNVDYSSFRTLLI  
GKHFLCLRDNSSSPNVVEAVSTTGGNTSLENMRSSSENKAELALLDLFSGCGGMSTGLCLG  
AKVSCVDLVTRWALDSNKSACESLKLNHNPETNVRNEAAEDFLELLKVWEKLCKRYAVKD  
IKSMQQSRSIASRVAEENDNSLSDNDITPGEYEVSKLVDLCYGDPDNIGKRGLKFKVHWK  
GYSTSEDTWEPVEGLRNCQECIRDFVRKGFKSKILPLPGDVDVICGGPPCQGISGYNRFRN  
VNAPLSDERNRQIVVFM DIVQFLKPKFVLMENVVDILKFDKASFARYALSRLVHMKYQAR  
LGTIAAGCYGLPQFRLRVFLWGAHPSEKLQFPLPTHDVIVRYWPPNEFERNTVAYDEGQP  
RELEKAAVLQDAISDLPPVTTHETREEMAYEKKPETEFQRFIRSTEHMTGSSQRGTTQMN  
NLLSDHRPYALTEEDCARVCLIPKRKGANFRDLPGILVGNDNVVRRDPTKEQVLLPSGKPL  
VPDFAFTFEQGKSKRPYARLWWDETVPVTVVTPSIHSQAMLHPEQDRALTIRECARLQGF  
PDYYRFSGTVKERYRQIGNAVAVPVGRALGYALGMAFLKLSGDGPLMTLPPKFSHSTNLQ  
LAKSLFQKTD

>RcMET2

MKKNKGKPKSSVSKANKEQINNIKEKKRSSSQKNEEPAGSKKRPKRAAACTDFKEKAVR  
LSDKSSVLESRRDQFADDEILAVHLTHGQDDGRPNRRLTDFVVHDENGTPQPLEMIEVDD  
MFISGLILPLDENPDKEKEKRVRCCEGFGRIEGWDISGYEDGFPVIWLTDDIADYNCLKPAN  
NYKKFYDHFKEKARACIEVYKLSRSSGGNPDLTDELLAGVVRMSGSKCFSGAASIKD  
FVISQGNFIYKQLLGLDETSKNNDQKFADLSALLALRDKSEEHGNFVLAKAVNTSGNLTIIY  
QKFGDSVSNVNQSISSTAAGEDEDAKLARLLQEEYWQTTKKQKKIHGSASSSNTIYIKIN  
EDEIANDYPLPVFYKHSDEETDEYIAIDTEEHIMVDPDELPKRMLHNWSLYNSDSLISLEL  
LPMKPCEDIDVTIFGSGRMTEDDGSGFSLDDDPDQSSSAGSGAQDDVGLPIFLSAIKEWMI  
EFGSSMVFISIRTDMAWYRLGKPSKQYTSWYKPVLKTAKLARSITLLKEQSRVSRLSFGD  
VIRRVSEFKKDDHGYISSDPATVERYVVVHGQIILQLFAEFPDEKIKKCAFVVGLTSKMEER

HHTKWVNVNKKQILQKNQPNLNPRAAMSSMAPVVSKRKAMQATTTRLINRIWGEYYSNY  
SPEDLKEATNCEAKEEDEVEEQEENEDDAEEEEKLLLLSDKTQKACSMSSRTKSYSKDEVLW  
DGNPVSKTHSGEAIYNSAIVRGEVIKVGAAVYLEVDESDELPAIYFVEYMFETSGGSKMFH  
GRVMQHGSGTILGNAANEREVFLTNECLNYELQDVKQAIAVEVRKMPWGYQHRNDNAT  
ADRIDRAKAEERKKKGLPLEYYCKSMYWPERGAFFSLPFDSMGLGSGICHCKVKEVEM  
EKYIFRVNSSRTGFVHMGTEYSIHDFVYVSPCHFTIEREAETYKGGRVNGLKAYAVCQLE  
IVVPKEPKQAEATSTQVKIRRFSPEDISSEKAYCSDIREVYYYTEETHLLSVETIEGKCEVRK  
KNDIPPCGSAAFDHIFFCEHLYDPSKGSCLKPLAHIKLYSTGTQESDAASRKRGKCKEG  
EDEVENKREATQGRRLATLDIFSGCGGLSEGLQQAGVSSTKWAIEYEPPAGEAFKLNHPES  
LVFINNCNVILRAVMEKCGDTDDCISTSEAIELAASLDEKIINDLPLPGQVDFINGGPPCQGF  
SGMNRFSQSTWSKVQCEMILAFLSFADYFRPKYFLLENVNRNFVSFNKGQTFRLALASLLE  
MGYQVRFGILEAGAYGVSHSRKRAFIWAASPEEVLPEWPEPMHVFSAPELKISLSGNSHY  
AAVRSTANGAPFRAITVRDTIGDLPVVGN GASATNMEYKNDPVSWFQKRIRGNMVTLTD  
HISKEMNELNLIRCQKIPKRP GADWRDL PDEKVKLSTGQLVDLIPWCLPNTAKRHNQWK  
GLFGRLDWEGNFPTSITDPQPMGKVGMCFHPEQDRILTVRECARSQGFRDSYKFAGNIQH  
KHRQIGNAVPPPLAYALGIKLKEALDGRLLK

>RcDRM3

MLISFSNSNAVL SWLTAEASGHDKMRKVHNGETSSNQKTTVPKPEMLDFDFPSDFIYSS  
QLGETAASSASDVRSFLTGMGFLPSLVDKVIQENGEDNVDLLEILMECSDPQKSNSQSS  
DSLDTLFNDKDASNPPPEYSKFGQPKEEPDVF GFDDSKRASLLHMNFS AEEVDFAMEKLGT  
DAPVDEIVDFITAAQVAANFDEERDDELEHDVEQNKYCSRHSRMNPSHVARGGESFNMEI  
RDEQRRDSYGRKKPENLSQEAVSRSSNLNLEEIHGKRPKQEYTEGYSNTQDEHFGFEEN  
YEEEGPKPEYTADSSFSFESAWVEEKVDTEITGFRIPREP KFKSCKSVDRMVAKPPYFLYGN  
VATVSLDTWGKISQFLYAVEPEFVNTQFFSALS RKEGYVHNLPTENRFHILPKPPMSILDAM  
PHIKKWWPSWDTRKQLSFINYETNGLSQLCDRLGRMLTDSRGLISSQQKRDILHHCHKLN  
LVWVGLHKVRIEPEHLELILGYPLNHTQTTEGSLTERLHALRYSFQIDTLGYHLSVLKSM  
FPEGITVLSLFSGIGGAEVALHRLGIHMKGVSVSETSKRKILRMWWRNSGQTGELEQIE  
DIQKLTTKKIDRLIERFGGFDFVICQSPCTCASGNPKMEQRADARSALDFSLFCEFVRVLQR  
VRTQVQRKR

>RcDRM2

MGVIVYCFRITTCKPVYMEHKTLYLEILGIAVASKEMDGDSFCGEGDNFDWDSEDEREIEN  
FGLTNSSCLAVPAVEATARSVEKCLMGFSCILRHASSSVRSSGTKVMDHFVGMGFPEKMOV  
AEAIQENGEENADLILETLTKFSTISSPSSSGSKLIDHFVGMGFDVEMVDRAIQENGEEKTD  
SILETLTYSVIEKSHQEQPHVDS DHWSSEYEGSFLNDFSDIDSSENEENGKSQPVEGNTLR  
FLARMGYTTDEASIALERCGPDANIAELTDFICAAQMAKAADASFPEEKPKIRHFDDDY  
KNKKRNYAEYDMWKKKKQMKL DKLLNGDDELIRLPNMLGFGVPTDPAIVTHRKLPE  
AALGPPFFYYENVALAPKGVWQTISRFLYDVEPEFVDSKYFCAAARKRGYVHNLPIQNRY  
PLLPLPPNNIHEALPLTKRWWPSWDTRTKLNCLQTCVASAKLTDRIKALEDYEGEPPLSIR  
KYVLDECRKWNLLWVGRNKLAPLEPDEVEMLLGFPRNHTRGGGISRTDRYKSLGNSFQV  
DTVAYHLSVLKDMFPEGISLLSFGIGGAEVALHRLGIRLKR VVSVEISEVNRNIMRCWW  
EQTNQTGTLIDIADVHDLNADRLEQLMSSFGGFDLVVGGSPCNNLAGSNRHHRDGLGK  
ESSLFFDYCRILDLVKCIMTRN

>RcDRM1

MDRFLSLVNVNVLLKHVTLKRQNSILRSQANSALTGCSSSRMVHQFVNMGFSEKLVMQAI  
DENGEDASILDSTLYSLRKEDFPCKKRKLHQNRSSKSQESKRKAKNFLERNGRTHLPN  
PMIGFGIPHEPWKITERKLHPIAVGPPYFYENAAALTPKGVWSKISSFLYDIQPEFVDSIYFC  
AAARKRGYVHNLPIQNRFPLLPRPPLTIHEVLPSTEKWWPSWDKRTKLNCLLTSYGNAKL  
TECIRKALEDGCEPTLRKKYVLEQCKRWNLVWVGKNKVAPLEPDEMMLLGFPKDH  
TRGGGINRNDRYKALGNSFQVDTVAYHLSVLKNLFPYGITVLSLFSGIGGAEVALHRLGIP  
LNSVVSVEISEVNRNIPRSWWEQTNQKGYLIEIGDVREVDGDSIKRWIKLFGGFDLVIGGS  
PCNNLAGANRRNRDGLGEQSSLFYDYRILKLVDRDTFGEIMDSEILNRILSYDDL

>PtCMT3

MPRKRQRSTASKPETSSSSPPKTRKMMSTTTAPKQSRLEKKAEEEEQSTASTRSLKEKKA  
EKEQSKAAARSCLKEKKAEEQLTTATRSRLMEKEAEEEEQSTAPNRSRLREKKVKKEETE  
EVFLDAEEDDTNSIDEVGAKMGTDNGDSRSETKEKEKEKRGSGKTKKISTPEKAKEEDGT  
PARFVGNQVPDAEARKKWPHRYANKIKNKTPISKPSNSLDDSEEIIKARCHYKRAEVDGII  
YNLYDDAHVQASDGEADYICRIIEMFESEDRTPHFTAQWYYRSTDTIHKDYISDPKCVFFS  
EIRNDNPLDCLTRKLKIVRLALGVDSETRAKTLNCDFYCDMLYLLPYSTFVKLPSENNTT  
APESSTISSDIDAAGVKFECDEVCESSGRRKSEVALLDLYSGCGAMSTGLCLGANLSGLN  
LVTKWAVDLNKHACESLRLNHPETQVRNETAEDFLMLLKEWEKLCIRFSLVKNDDEPEKQ  
QTYSFDMDEDDDDDDDEEEEDDDNNDVSDNNDDESEVFEVEKILEVCHGDPKEIGGQRDLY  
FKVSWKNYGPDYDTWEPISGLSNCREAIKKFVMHGYKSNILPLPGDVEVICGGPPCQGIS  
GFNRFRNVKNPLEDPKNKQLVVFMDIVDFLKPKFVLMENVVDLLKFADGFLGRYAMGCL  
VSMKYQARLGMLAAGAYGLPQFRMRVFLWGACATEKLPQYPLPTHDLVLRGVVPLEFE  
GNTVAYEEGVKPKQLERKLFLEDAISDLPAVANDEKRDEMPYGESPKTEFQRMIRLKKMGL  
ELNDLLFDHRPLELNDDDYQRCVQIPKRKGGNFRDLPGVRVRPDKKVEWDPEVPRQYLS  
SGKPLVPDYAMTFVNGSSSKPFARLWWDETVPVTVTRAEPHNQAIMHPEQDRVLTIRENA  
RLQGFPDYYQLCGPIKERYIQVGNVAVPVARALGYALGRAFGQGFAGDDPVFSLPKKFPRI  
TEDPSSSSEAQC

>PtDNMT2

MEEKKGLLPKKEEPWRVLEFYSGIGGMRYSLMKAGVNAKVVEAFDINDKANDVYEYN  
FGHRPYQGNIELTAADLDNYGAH  
TWLLSPPCQPYTRQGLQKQSGDARAFSFLKILELIPHTKQPPNMLFVENNVGFETSDTRAK  
MIEILASSEYITQEFILSPLQFGVPYSRPRYFCLAKRKP  
LSFHHEVCNNKLLWSPSPLFEHNENNVTGDGWDQPPVNWDTLIHSCEPVERFLEFKSSSNR  
VTGGTGTDVSADESGALENIDERNLNTMSQYIVPLSLIER  
WESAMDIVYPDSKRCCCFKSYRYVKGTGSLLATIQPNIKGESSLKKQGLRYFTPRELC  
IIGKQFKRSSGCALTPLSIFSTIMIFQSKSPIYRFMAFS  
FNFCTTPNFPCKGS\*

>PtCMT2

MKSSSSPTDSRKLTPQVYESTSTSRSPRLAPPNNNVPSKTPKSNKPKTTHISLRRSPRLEP  
TPASPQSVSRKKHSRNVSKTKCSARNVSVDRKIPSRSSRVGNSRMQNVAANRTVLLDSSA  
LRRSPRLSSADMEIVVSERNASVVVADTARLRRSPRLANGYAEVAVSKVRTFLKRKRVSDE  
MSRSPRNQNGRLDVQFALVQSEKCSRFIVNEENERNCLKVECSSKDLSKGSPVACSSANA

KLGCCEKRGCSVLLTISDSEVGDSGEFEAKPLLLPWHGDNESQTGMVKCDDGSSVFEEE  
PLRMSPSFDANENAVINESPIKSCKWSSALDGDGNFEVISCSSGIFDSNDACPSKRVKICEE  
NSVSGMSDEKLLRRSPRTNSIVVTENGENKSGKKQSPKTNSGKELSLEKASSGKKQKEHR  
GNCSLIGDPVAHDEAQRWHWRYEMKSKRTKHPRLALDDDDDEDKVVWNVECHYTQANI  
EGRIINLGDCVYVKGEGAKNHIGSILEFFKTTDREDYFRVQWFYRAEDTVMKEAADFHD  
NKRLFYSTVMNDNPIDCIISKVTTVVQISPRVHLKFHSTPASDFYFDMEYCVDYSTFRTLLTD  
CSLRGHELSPLPFCDSRSATPSDISMENMSTCGSYKAKLTLLDLFSGCGGMSTGLCLGAKV  
SCVDLVTRWALDSDESACQSLKLNHPETHVRNEAAEDFLELLKEWQKLCKRYAVNDVGR  
THKSRSMASSMSKQNKNSNDDDIASGEYEVARLVDICYGKTDKRGKRGKLFKVHWKG  
YSTSEDSWEPIEGLSNCEHSIRDFVREGFKSKILPLPGDADVICGGPPCQGISGYNRYRNVD  
SPLADERNIQIVVFMDIVQFLPKYVLMENVVDILRFDKASFARYALSRLVHMKYQARLG  
TVAAGCYGLPQFRLRVFLWGAHPKEKLPQFPLPSHDVIVRYWPPPEFERNTVAYDEDQPR  
DDLEKATVLRDAISDLPDVTSHETREEMAYDKPPETDFQQFIRSTRNEMTGSELSGTRMIN  
LLYDHRPYSLTEEDFARVCQIPKKKGANFRDLPGVVVGADNVARRDPTEEQMLLPSGKPL  
VPDFALNFEGGKSRRPYARLWWDETSTVTVTFPDLSQAVMHPEQDRVLTIRECARLQGF  
PDYYRFCGTVKQRYRQIGNAVAVPVGRALGFTLGMAFQKLSGDDPLMTLPPKFSHSTNLQ  
LAKSLFQKAE

>PtMET1

MRKNKKGKQKSSVSNAKKEVPEKTAKGKKRNFSDTNKEDPAGGSLTRPRRAAACKDFK  
EKSLRLHEEKSSVVEKKEQVVNEEILALRLTQGQEEGRPNRRLIDFVVDANGNPQPLE  
MIEVDDMFISGVIMPLEESLDKEKEVPVRCEGFGRIEAWNISGYEDGSPVIWLTTEVADYD  
CIKPSGGYKKFFDRFFQKALACIEVYKLSRFSGGNPEFTLDELLAGVVRAMSGNKCFSG  
APSVKNFLVSQGEFIYQQITGLDQTSKKNDKFFSDDLPAVALRDESRNHGSVLLAKAANPG  
GNLVIDPKSVDGAIVNQSNQSSTIAEEDDAKLARLLQEEYWHSNMRQKKSRSASASN  
TIYIKINEDEIANDYPLPVFYKHSDEETDEYVVVASDDVIDHPDDLPRKMLHNWSLYNSDS  
RLISLELLPMKPCEDIDVTIFGSGRMTEDDGSGFCLDDDPDQSSSRGSEAQDDMGLPIFLSA  
IKEWMIEFGSSMIFISIRTDMAWYRLGKPSKQYGSWYKPVCLKTVKLARSITLLKEQSRVSR  
LSFADVIRKVSEFKKDDHHAYISSDPAAIERYVVVHGQIILQLFAEFPDQIKKKCAFVVGLTR  
KMEERHHTKWVVKKAIVQKFQSNLNPRRAAMDTVAPGSKRKLMQATTRLINRIWGEY  
YSNYSPEDLEEGAECEVKEEDEAEQYENEDDDKEEVVEKTLKPRSVSERTKSHTSQKEV  
RWDGNPVSKTSSGEAIYKRAIVCGEVIVVGDAVLVEVDESDELPAIYFVEYMFETRNGSR  
MFHGRMMKRGSETVLGNTANDREVFLTTECMNYKLQDAKQAIILEVLKRPWGHDRKD  
NINADRIDREKAEERKKKGLQVEYYCKSLYWPERGAFFTLPLDTMGLGSGVCHSCNLKIA  
EEDKDIFRVNSSQTGFSYKGTEYSVHDFVYVSPHQFASERGENETFKGGRNVGLKPYVVC  
QLLEVVLKEPKQAETRSTQVNVQRFFRPDDISPEKAYCSDIREIYYSEETHLLSVETIEGKC  
EVRKKNDIPTCSAPAFDNIFCEHMYDPSKGSCLKLPAQVKSFKSAVSRDGDVASRKRKG  
KSKEGENDIEADKQREASPENRLATLDIFAGCGGLSEGLQQAGVSSTKWAIEYEYPAGEAF  
KLNHAGSLMFINNCNVILRAVMEKCGDADDICISTSEAGELASSLDAKVIDGLPLPGQVDFI  
NGGPPCQGFSGMNRFNQSTWSKVQCEMILAFSLFADYFRPKYFLLNVNRNVSFNKGQTF  
RLTIASLLQMGYQVRFGILEAGAYGVSQSRKRAFIWAASPEEILPEWPEPMHVFAAPELKIT  
LSEKSQYSAVRSTAYGAPFRAITVRDTIGDLPDVGNGASKTNLEYGNDPVSWFQKKIRGD  
MVVLTDHISKEMNELNLIRCKKIPKRPADWRDLPEKVKLSTGQMVDLIPWCLPNTAK  
RHNQWKGLFGRLDWEGNFPTSITDPQPMGKVGMCFHPEQDRILTVRECARSQGFPSYQ

FSGNIHHKHRQIGNAVPPPLSYALGRKLKEALDSKRRK

>PtMET2

MGSSSILDTTNDPVDNTISSSSSVGMRKNKKGKQKSSVSNVKKEVPEKNTKGKKRNSPD  
TNKEEPTGGDGSCLKRPKRAAACKDFKEKSVRLHEEKSYVVESKKEQVVDDEILAVRLTQG  
QEEGRPNRRLIDFVVHDANGNPQPLEMVEVDDMFISGIIMPHEESLDKEKEVHVRCDFG  
RIEAWDISGYEDGSPVIWLSTEVDYDCIKPAGGYKKFFDHFFQKALACVEVYKKLSRFSG  
GNPEFTLDELLAGVVRAMSGNKCFSGAVSIKNFLISQGEFIYHQIIGLDETSTKNDKKFADL  
PVLVALRDESRNHGNVLIKAANS GG NLVIGPESVDGAVVNQSNQSSTTVEEDED AKLAR  
LLQDEEYWQSNMRQKKSRGVSASNTIYIKINEDEIANDYPLPAFYKHSNEETDEYIAVAS  
DDVIDHPDDLPRRMLHNWSLYNSDSLISLELLPMKPCEDIDVTIFGSGSMTEDDGSGFCL  
DDGPDQSSSRGLEAQDDMGLPIFLSAIKEWMIEFGSSMIFISLRD MAWYRLGKPSKQYAS  
WYKPVLKTVKLARTIITLLKEQSRVSRLSFADVIRKVSEFKKDHAYISSDLAAVERYVVV  
HGQIILQLFAEFPDQKIKKCAFVVG LTRMMEERHHTKWVVNKKAI VQKCHSNLNPR AAM  
DTVASGASKRKL MQATTT RLINRIWGEYYSNYSPEDLKEGNDCDVKEEDELEE QDENED  
DDKEVVVEKTLKPYSVFEHCKSHTSQKEVRWDGNPVRKISSGEDIYKQAI VCGQVIVVGA  
AVLVEVDEPDELPAIYFVEYMFETRNGSKMFHGRMMKWGSETVLGNTANDREVFLTNEC  
MNYKLQDVKQTIILEVRKRPWGHHRKDNANADRIDREKAEERKKKGLPLEYYCKSLY  
WPERGAFFTLPFDTMGLGSGVCHSCNLKISEEDKNISKVNSSQTGFSYKGTEYSVHDFVY  
VSPHQFAVESGETETFKGGRNVGLKPYAVCQLLEVVP METKQSETRSTE VKVQRFFRPDDI  
SPEKAYCSDIREIYYSEETHLLSVEVIEGKCEVRKKIDIPTCSAPAIFDHTFFCEHMYDPSNG  
SLKQLPAHIKSKFSAVSKDGDVASRKRKGKSKEGENDTEDDKQLEASPEYRLATLDIFAGC  
GGLSEGLQQAGVSTTKWAIEYE PAGEAFKLNHAESLMFINNCNVILRAVMERCGDADD  
CISTSEAAKMASSLDKVIDGLPLPGQVDFINGPPCQGFSGMNRFNQSTWSKVQC EMIL  
AFLSFADYFRPKYFLE NVRN FVSFNKGQTFRLT IASLLQMGYQVRFGILEAGAYGVSQSR  
KRAFIWAASPEEILPEWPEPMHVFAAPELKITLSEKSQYAAVRSTAYGAPFRAITVRDTIGD  
LPDVANGASKTNLEYGNDPISWFQKKIRGDMVVLTDHISKEMNELNLIRCKNIPKRP GAD  
WRDL PDEKVKLSTGQMVDLIPWCLPNTAKRHNQWKGLFGRLDWEGNFPTSITDPQPMG  
KVGMC FHPEQDRILTVRECAR SQGFPDNYQFFGNIQH KHRQIGNAVPPPLAYALGRKLKE  
ALDSKRQK

>PtMET3

MNVGMRKNKKGKQKSSVSNVKKEVPEKNTKGKKRNSPD TNKEEPTGGDGSCLKRPKRA  
AACKDFKEKSVRLHEEKSYVVESKKEQVVDDEILAVRLTQGQEEGRPNRRLIDFVVHDAN  
GNPQPLEMVEVDDMFISGIIMPHEESIDKEKEVHVRCDFGRIEAWDISGYEDGSPVIWLS  
TEVDYDCIKPAGGYKKFFDHFFQKALACVEVYKKLSRFSGGNPEFTLDELLAGVVRAM  
SGNKCFSGAVSIKNFLISQGEFIYHQIIGLDETSTKNDKKFADLPVLVALRDESRNHGNVLI  
KAANS GG NLVIGPESVDGAVVNQSNQSSTTVEEDED AKLARLLQEE EYWQSNMRQKKSR  
GSVSASNTIYIKINEDEIANDYPLPVFYKHSNEETDEYIAVASDDVIDHPDDLPRRMLHNWS  
LYNSDSLISLELLPMKPCEDIDVTIFGSGSMTEDDGSGFCLDDGPDQSSSRGLEAQDDMG  
LPIFLSAIKEWMIEFGSSMIFISLRD MAWYRLGKPSKQYASWYKPVLKTVKLARSITLLK  
EQSRVSRLSFADVIRKVSEFKKDHAYISSDLAAVERYVVVHGQIILQLFAEFPDQKIKKCA  
FVVG LTRMMEERHHTKWVVNKKAI VQKCHSNLNPR AAMD TVASGTSKRKL MQATTT RL  
INRIWGEYYSNYSPEDLKEGNDCDVKEEDELEE QDENEDDDKEVVVEKTLKPYSVFEHC

KSHTSQKEVRWDGNPVRKTSSGEDIYKQAIVCGQVIVVGA AVLVEVDEPDELPAIFYVEY  
MFETRNGSKMFHGRMMKWGSETVLGNTANDREVFLTNECMNYKLQDVKQAIILEVRKR  
PWGHHHRKDNANADRIDREKAEERKKKGLPLEYYCKSLYWPERGAFFTLFPD TMGLGS  
GVCHSCNLKISEEDKNISKVNSSQTGFSYKGTEYSVHDFVYVNP HQFAVESGETETFKGGR  
NVGLKPYAVCQLLEVVP METKQSETRSTE VKVQRFFRPDDISPEKAYCSDIREIYYSEETHL  
LSVEVIEGKCEVRKKIDIPTCSAPAIFDHTFFCEHMYDPSNGSLKQLPAHIKSKFSAVSKDG  
DVASRKRKGKSKEGENDTEDDKQLEASPEYRLATLDIFAGCGGLSEGLQQAGVSTTKWAI  
EYEEPAGEAFKLNHAESLMFINNCNVILRAVMERCGDADD CISTSEAAKLASSLDAKVIN  
GLPLPGQVDFINGGPCQGFGSMNRFNQSTWSKVQCEMILAFLSFADYFRPKYFLL ENVR  
NFVSFNKGQTFRLTIASLLQMGYQVRFGILEAGAYGVSQSRKRAFIWAASPEEILPEWPEP  
MHVFAAPELKITLSEKSQYAAVRSTAYGAPFRAITVRDTIGDLPDVANGASKTNLEYGN DP  
ISWFQKKIRGDMVVLT DHISKEMNELNLIRCKNIPKRPGADWRDLPDEKVKLSTGQMVD  
LIPWCLPNTAKRHNQWKGLFGRLDWEGNFPTSITDPQPMGKVGMC FHP EQDRILTVREC  
ARSQGFDPNYQFFGNIQH KHRQIGNAVPPPLAYALGRKLKEALDSKRQK

>PtDRM2

MEDPNRSRSSSDWNNNNKNLIKPKHEKLDFDLAFESLSREVGDNVASSRSYLSFFTE  
MGYSPSLVNRVIEENGEDNVDLLLLEILMECSGLQKPNSQSSDSLDC LFDDRGESSPPKYST  
VTGVKEEPDVFDEVYDDKRVSL LKMNFPAKEVELAMD KLG ENAPINEIIDFIIAAQIANNL  
DRETEDMPDIDAENKEDVNDETLYGTMDKTLCLLMGFSENEVSLAIDKFGSEVPVTELA  
NAICAHQLGETYVIKKKYSENSTASCSSAAEDSRSGVETENNTRHHSFSWVKSETEDCR  
RDAILQSRDMNTKETRK GKRPRQEHIEGYQEAQPRHDSLEENCAGEQPKQEYDYGSSSYF  
EHEWVEEKVNSDTTTTFGMPKPFKCNPKILDQIAAKPPYFFYGNVATASSDTWGKISQFLY  
GIEPEFVDTQFFSALSREGYIHNLP TENRSHILPKPPITLEDLMPSTKKWWPSWDARKKM  
SCRNFDSSGSSQLCDMLGRMLDDSRGLLSAEQQRDLLRHCQALNLMWVGPNKLSPLESA  
HLEKILGYPLNHTLIADYPLTERMYSLRYSFQTDTLGYHLSVLKSIFPQGITVLSLFSGIGGA  
EITLHRLGIHLKG VVSVETSETNRRVLKRWVYSSGQTGRLEQIEDIRKLTSSSTVERLVENF  
VCFDFVICQNSFTRPSKIPGVGSGLESQHFFDFTLFNEFVRVLQRVRS AIERKR

>PtDRM1

MDGDSL CGDNDDFDWDSEDEKEIENFASSSSSSLRLPQVETRSSSAEASSSVGSSSGSKMI  
DHFVKMGFPEKMVAEAIQENCKGEEDEDSILETLLKYSTSSSASSSGSKLFDRFVGMGFAE  
KMVAKAIKENEGDADSVLETLLTYAAIGKSPQE QPNNDSDHCSSGHEGSFLDDFSDVDS  
ADDEVITKTVSDEDNKL AFLRRMGYKEADASIAITRCGTEATISELADFICAAQIAKAEDA  
FFAEDEKKPKHLDKQKKRSFLES DVLEKKRQKGLENGDDEGVRLPNPMVGFGVPTEPGI  
VTRRTLSEAAIGPPFFYYENVALAPKGVWQTISRFLYDVEPEFVDSKH FCAAARKRGYVH  
NLPIHNRFP LLPLPPNTIHEALPLTRKWWPAWDERTKLNCLQTCIASAKLTERIRKALEAYE  
GEPPLHVQKFIMDECRKWNLVWVGRNKVAPLEADEVEMLLGFPRNHTRGGGISRTDRYK  
SLGNSFQVDTVAYHLSSLKDLFPGGINVLSLFSGIGGA EVALHRLGIRLKNVVSVEISNVNR  
SIMSCWWEQTNQTGNLIHIEDVQH LTADRLEQLMNMYSF DLVVGSPCNNLAGSNRHH  
RDGLEGKESSLFFDYCRILDVVKNLTSRYS

>ZmMET1a



MLTNDFSGTRRCRAKPQKKEEESTENNNKLENGSLDATEEVHHGVEKGDGHVTRKRPRRS  
AACSDFKSEKIRSIRLSEKKSVMVMVKKNRMEEEEVDVAVNLTKLGPEDPPPCRKLIDFILHDAEG  
NPQPFEMSEIDFFITALIMPMDDDLEKERERGVRCCEGFGRIEDWNISGYDEGTPVIWVST  
DVADYECVKPSTNYKSYFDHFYEKAQVCVEVFKKLAKSVGGNPNQGLDELLASVVRSTN  
AMKGYSGTMSKDLVISIGEFVYNQLVGLDETSNNDDEKFATLPVLLSLRDQCRSRVELTKL  
PSNFSNTSLKIKDSECDATAEDDDDAKLARLLQEEEEWKMMKKQRGRRGTPSQKNVYIK  
ISEAEIANDYPLPAYYKPFQEMDEYIFDSDDSFDDVPVRILNNWTLYNADSRILSLELIP  
MKSGAENDVVIFGSGFMRDDDGSCCSTAESVKSSSSSSKADQLDAGIPIYLSPIKEWIIIEFG  
GSMICITIRTDVAWYKLRQPTKQYAPWCEPVLKTARLAVSIITLLKEQSRASKLSFADVIRK  
VAEFDKGNPAFISSNITLVERYIVVHGQIILQQFADFPDETIRRSFAVSGLLLLKMEQRRHTKL  
VMKKKTQVMRGENLNPSAAMGPASRKKAMRATTTTRLINRIWSDYYAHFPEDSKEGDGN  
ETKEIDDEQEENEDEDAEDEGQIEENISKTPPSTRSRKLLSQTCKEIRWEGETSGKTLSET  
LYKCAYVRELRIPVGGTVALEDDSGDTVICFVEYMFQKVDGSKMVHGRILQKGSQTILGN  
AANEREVFLTNDCLEFKLDDIKELVMVDIQSRPWGHKYRKENSEADKVEQVKAERKKK  
GQPMVYFCKSLYWPEKGAFALSRDKMGLGSLCSCDNIEPDSDELKIFSKTSFVYRKV  
TYNVNEFLYIRPDFAEDEDRAITFKAGRNVLKPYAVCQILSIPEGAGSKKLNPAANISAR  
RFYRPDDISSAKAYASDIREVYYSSEVIDVPVDMIEGKCEVRKKNDLASSDLPVMFEHVFF  
CELIYDRASGALKQLPPNVRFMVMVQRTSALKKNKGKQICEPDQIDSGKWLDVPKENRL  
ATLDIFAGCGGLSEGLQQAGVSFTKWAIEYEEPAGEAFNKNHPEAVFVDNVCNVLKAIM  
DKCGDTDDCVSTSEAAEQAAKLPEVNINNLVPVGEVEFINGPPCQGFSGMNRFNQSPWS  
KVQCEMILAFLSFAEYFRPRFFLLENVRNFVSFNKGQTFRLAVASLLEMGYQVRFGILEAG  
AFGVAQSRKRAFIWAAAPGEMLPDWPEPMHVFASPELKITLPDGQYAAARSTAGGAPFR  
AITVRDTIGDLPKVGNGASKLTLEYGGEPVSWFQKKIRGNMMVLNDHISKEMNELNLIRC  
QHHPKRPDGDWHDLPDEKVKLSNGQMAADLPWCLPNTAKRHNQWKGLYGRLDWEGNFP  
TSVTDPPQPMGKVGMCFHDPDQDRIITVRECARSQGFDPDSYEFAGNIQNKHRQIGNAVPPPLA  
YALGRKLKEAVDKRQEASAGVPAP\*

>ZmMET1b

MLTNDFSGTRRCRAKPQKKEEESTENNNKLENGPLDATEEVHHGVEKGDGHVTRKRPRRA  
AACSDFKSEKIRSIRLSEKKSVMVMVKKNRMEEEEVDVAVNLTKLGPEDPPPCRKLIDFILHDAEG  
NPQPFEMSEIDFFITALIMPMDDDLEKEREGVRCEGFGRIEDWNISGYDEGTPVIWVST  
DVADYECVKPSTNYKSYFDHFYEKAQVCVEVFKKLAKSVGGNPNQGLDELLASVVRSTN  
AMKGYSGTMSKDLVISIGEFVYNQLVGLDETSNNDDEKFATLPVLLSLRDQCRSRVELTKL  
PSNFSNTSLKIKDSECDATAEDDDDAKLARLLQEEEEWKMMKKQRGRRGTPSQKNVYIK  
ISEAEIANDYPLPAYYKPFQEMDEYIFDSDDSFDDVPVRILNNWTLYNADSRILSLELIP  
MKSGAENDVVVFGSGFMRDDDGSCCSTAESVKSSSSSSKADQLDAGIPIYLSPIKEWIIIEFG  
GSMICITIRTDVAWYKLRQPTKQYAPWCEPVLKTARLAVSIITLLKEQSRASKLSFADVIRK  
VAEFDKGNPAFISSNITLVERYIVVHGQIILQQFADFPDETIRRSFAVSGLLLLKMEQRRHTKL  
VMKKKTQVMRGENLNPSAAMGPASRKKAMRATTTTRLINRIWSDYYAHFPEDSKEGDG  
NEIKEIDDEQEENEDEDAEDEGQIEENISKTPPSTRSRKLLSQTCKEIRWEGETSGKTLSET  
LYKCAYVRELRIPVGGTVALEDDSGDTVMCFVEYMFQKVDGSKMVHGRILQKGSQTILD  
NANEREVFLTNDCLEFKLDDIKELVMVDIQSRPWGHKYRKENSEADKVEQVKAERKK

KGQPMVYFCKSLYWPEKGAFALSRDKMGLGSLCSCSDNIEPDSDELKIFSKTSFVYRK  
VTYNVNEFLYISPDFFAEDEDRATFKAGRNVGLKPYAVCQILSIPEGAGSKKLNPA SANISA  
RRFYRPDDISSAKAYASDIREVYYSEDVIDVPVDMIEGKCEVRKKNDLASSDLPVMEHVF  
FCELIYDRASGALKQLPPNVRFMSMVQRTSALKKNKGKQICEPDQIDSGKWLDVPKENR  
LATLDIFAGCGGLSEGLQQAGVSFTKWAIEYEEPAGEAFNKNHPEAVVFVDNCNVILKAIM  
DKCGDTDDCVSTSEAAEQAAKLPEVNINNLVPVGEVEFINGGPPCQGGFSGMNRFNQSPWS  
KVQCEMILAFLSFAEYFRPRFFLLENVRNFVSFNKGQTFRLAVASLLEMGYQVRF GILEAG  
AFGVAQSRKRAFIWAAAPGEMLPDWPEPMHVFASPELKITLPDGQYYAAARSTAGGAPFR  
AITVRDTVGDLPKVGNGASKLTLEYGGEPVSWFQKKIRGNMMVLNDHISKEMNELNLIR  
CQHIPKRP GCDWHDL PDEKVKLSNGQMADLIPWCLPNTAKRHNQWKGLYGRLDWEGNF  
PTSVTDPQPMGKVGMCFHPDQDRIITVRECAR SQGF PDSYEFAGNIQNKHRQIGNAVPPPL  
AYALGRKLKEAVDKRQEASAGVPAP\*

>ZmMET2a

MAPSSPSPAAPTRVSGRKRAAKAEIIHQNKEEEEEEVVAASSAKRSRKAASSGKKPKSP  
PKQAKPGRKKKGDAEMKEPVEDDVCAEEPDEEELAMGEEEAEEQAMREEVVAVAAGSP  
GKKRVGRRNAAAAAGDHEPEFIGSPVAADERSNWP KRYGRSTA AKKPDEEEELKARCH  
YRSAKVDNVVYCLGDDVYVKAGENEADYIGRITEFFEGTDQCHYFTCRWFFRAEDTVIN  
SLVSISVDGHHKHDPRRVFLSEEKNDNVLD CIISKVKIVHVDPNMDPKAKAQLIESCDLYD  
MSYSVAYSTFANISSENGQSDSDTASGISSDDVDLETSSSMPTRTATLLDLYSGCGGMSTGL  
CLGAALSGLKLETRWAVDFNSFA  
CQSLKYNHPQTEVRNEKADEFLALLKEWAVLCKKYVQDVDSNLASSEDQAEDSPLDKD  
EFVVEKLVGICYGGSDRENGIYFKVQWEGYGPEEDTWEPIDNLSDCPQKIRDFVQEGHKR  
KILPLPGDVDVICGGPPCQGISGFNRNRYNRDEPLKDEKNKQMVTFMDIVAYLKPKYV LME  
NVVDILKFADGYLGKYALSCLVAMKYQARLGMMVAGCYGLPQFRMRVFLWGALSSMVL  
PKYPLPTYDVVVRGGAPNAFSQCMVAYDETQKPSLKKALLLGDAISDLPKVQNHQPNDV  
MEYGGSPKTEFQRYIRLSRKDMLDWSFGEGAGPDEGKLLDHQPLRLNND DYERVQQIPV  
KKGANFRDLKGVRVGANNIVEWDPEIERVKLSSGKPLVPDYAMSF IKGKSLKPFGRLLWW  
DETVPTVVTRAEPHNQVIIHPTQARVLTIRENARLQGFPDY YRLFGPIKEKYIQVGN AVAVP  
VARALGYCLGQAYLGESEGS DPLYQLPPSFTSVGGRTAGQARASPVGTPAGEVVEQ\*

>ZmMET2b

MAPSSPSARPTRASGRKRSAMAEIIHQNQEEEEEEVVAASTAKRRRKAASSGKKPKPTPK  
QAKPAVAGMKKKGETEKTEPVVDDVCAEEPDEEELAMGEEEAEEQAMQEVVA AVAA  
GSPGKKRVGRRSAAASGDHVPEFIGSPVAAA EAHSNWP KRYERSTAANKPEEDDELKARC  
HYRSAKVDNIVYCLGDDVYVKAGENEADYIGRITEFFEGTDRCHYFTCRWFFRAEDTVIN  
SLVSINVDGHHKHDPRRVFLSEEKNDNVLD CIISKVKIVHVDPNMDPKAKAQLIEHCDLYY  
DMSYSVAYSTFANISSENGQSGSETASGISSDDAGLETSSNMPERTATLLDLYSGCGGMSTG  
LCLGAALSGLKLETRWAVDLNSFACQSLKYNHPQTEVRNEKADEFLALLKEWAVLCEKY  
VHQDVDSNL AGSEDQEDADTLDKDEFV VQKLIGIRYDGTGRKKGVYFKVQWEGYGPEE  
DTWEPI  
DNLSDCPLKIREFVQEGRKRKILPLPGDVDVICGGPPCQGISGFNRFRNRDEPLKDEKNKQ  
MVTFMDIVAYLKPKYVLMENVVDILKFADGYLGKYALSCLVAMKYQARLGMMVAGCYG  
LPQFRMRVFLWGALSSMVL PKYPLPTYDVVVRGGAPNAFSQCMVAYDETQRPSLKKALL  
LGDAFSDLPKVENHQPNDVMEYGGSPKTEFQRYIRLGRKDMLDWSFGEEAGPDEGKLLD

HQPLRLNDDYERVKQIPVKKGANFRDLKGVKVGANNVVEWDPEVERVYLSSGKPLVP  
DYAMSFIKGKSLKPFGRLLWDETVPVTVTRAEPHNQVILHPTQARVLTIRENARLQGFPD  
YYRLFGPIKEKYIQVGNVAVPVARALGYCLGQAYLGESDGSQPLYQLPASFTSVGRTAVQ  
ANAVSVGTPAGEVVEQ\*

>ZmMET3a

MAHWVSDSDGSDNFEWDSGNGEEPANFNAAGAGSSALRSTNTDAPGPSTRVANGNGK  
AGPSASLVQKYMDMGFTTEEIVRKAMKDNNGADSLVELLLTYQELGNDLKVDNGFAS  
GCAPQTVDDSDDDILENWDDEDADGGRSTRVANSIDDEDEDFLNEMSQKDKKVDSL  
KMGFPEDEAALAITRCGQDASISVLVDSIYASQTAGDGYCGNLSDYEGNSNGGRNKGRF  
MDGNKKKRKRYGGQAQGNRGPLDGSCEPMPLPNPMVGFNLPDHWTRPVDRSLPTQAI  
GPPYFYENVALAPKGVWTTISRFLYDIQPEFVDSKYFCAAARKRGYIHNLPLERRSPLP  
LPPKTIFEAFPRTRKRWPSWDPRRQFNCLQTCTSSAKLLERIRVTLANSSDPPPLVQKFVL  
EECRKWNLAUVGLNKVAPLEPDEMEFLLGFPKDHTRGISRTERYRSLGNSFQVDTVAYHL  
SVLKDRYPQGMNVLSLFTGIGGAEVALHRLGIRMNTVVSVEKSEVNRTILKSWWDQTQT  
GTLIEINDVQTLTADRIEAYIRRIGGFDFLVIGGSPCNNLAGSNRHHRDGLEGEHSSLFYHYF  
RILDSVKSIMERL\*

>ZmMET3b

MVHWVSDSDGSDNFEWDSGNGEQTVSFNAAGAGSSALAAATNTDAPGPSTRVANGNGK  
AGRSASLVQKYVDMGFSEEIVLKAMKDNNGADSLVELLLTYQELGNDLKVDNDFASS  
CAPKTADDSDDDDTLEIWDDEDAGGRSTRVANSVDDSDDEDFLHEMSRKDEKVDSL  
KMGFPEDEAALAITRCGPDASISVLVDSIYASQTAGDGYCGNLSDYEDNSYGGSTGNKKK  
RKRYGGQAQGSRGPLDGSCEPMPLPHPMVGFNLPDQWSRRVDRSLPAQAIGPPYFYEE  
NVALAPKGVWTTISRFLYDIQPEFVDSKYFCAAARKRGYIHNLPLENRSPLPIPPTISEAF  
PRTKRWWPSWDPRRQFNCLQTCVSSAKLLERIRVALTNSSDPPPPRVQKYVLEE  
ECRKWNLAUVGLNKVAPLEPDEMEFLLGFPKDHTRGISRTERYRSLGNSFQVDTVAYHLSVLKDLFP  
QGMNVLSLFSGIGGAEVALHRLGIQMNTVISVEKSEVNRTILKSWWDQTQTGT  
LIEITDVQTLSSERIEAYIRRIGGFDFLVIGGSPCNNLTGSNRHHRDGLEGEHSALFH  
HYFRILHAVKSIMERL\*

>ZmMET3c

MEKTLSSLQMGFTEEEVSSAIDNFDQRATVQELADSILARRIANSIEQKEIKVESDFLDEAE  
TDYSSYQPSYSDVSYDDDDNN  
NTRVKRAKHIFIDDIGASSHLGDPWSMGQRAGTNDMSVKVELEAMTPGRRANVQGD  
LAKPPFFLYGNVVEVPKDTWHQLKQFLYNVEPEFVNSQSFSALTRREGYIHNLPVEKRSV  
VVPKSPMTIEEALPFTRQWWPSWDTRKHISVITTEAAGIEQTCERLGGMVRESRGVLSQAR  
QMQUIHQCRVSNLIWVGRDRLGPLEPRQVEKILGYPNHTNLFELNQPDRLAAMKYAFQT  
DTLSYLLSVLKGYQDGIRVLSIYSGIGGAEVALHRLGIPLKCVISVEESEVNRIKLRWWL  
KTEQTGVLRQHAGIWKLKTHVIEDLVKEFGGFDLIIGGNYTSCKGGTTVNTTMGMDSNR  
FYEYNRVVKRVRTAVGLS\*

>ZmDNMT2

MEAPAPWRVLEFYSGIGGLRYSMASGVRAEVVEAFDINDVANDVYEHNFGHRPCQGN  
IQTLTASDLDDKYKAHAWLLSPPCQP  
YTRQGLQKHSADARAFSFIKILNLMQDMSYPPQMLFVENNVGFEVSDTHDQLLEVLSSLN

FNTQEFILSPLQFGVPYSRPRYFCLAKREPVRFRHAFVNN  
KLLQTPMCLSLTSSTSQGSQSDHQTEEELEPVCKPIKDFLVKEADGGTPDETVLQDYMVPV  
NLIERWGNAMDIVYPEFKRCCCFTKSYRYVKGTGSLLAT  
SKNLNVPEEKLQISSLKELGLRFFTPREVFHFSFSPNFCFPHISLRQQYAMLGNSLSIAVV  
GPLLHYLFAEA\*

>PhMET1

MGSLAELDKVDTDAAGHKKDKSKQESVSKRKAPATNKKEKKRSVSETNEEPTAARKM  
PK

RAAACTDFKEKSVHLSKNSSVIETKKDQCVEEEGVAIRLTAGQQDSQRPCRRLMDFVFHD  
SKGKPQPFEMSEVDDLFIISGLVLPLEDSDKEKAKGIRCEGFGRIEEEWAISGYEDGTPVI  
WISTEAAADYDCIKPSGSYKKFYDHFFAKATACIEVYKKLSKSSGGNPDLSDDELLAGVVR  
AMSGLKCFSGGVSIKDFVVSQGEFIYKQLAGLDDTSKKTQDLFVELPVLASLRDESSKLE  
MLAQPEPISSGKALCIGPKVGNTEDKTDQSGLTGPGQEQEDLKLAKLLHEEEYWRSLKQ  
KKGRSTSSSSSKFYIKINEDEIASDYPLPAYKTSNEETDEYIVFDGGVDITYYIDDLPRS  
MLHNWALYNDSRLISLELLPMKPCADIDVTIFGSGVMTADDGSGYSFDADANHSSSGGS  
GTAIDGMPIYLSAIKEWMIEFGSSMVFIKRTDMAWYRLGKPSKQYAPWYEPVLKTARL  
AVSIITLLKEQSRVARLSFGDIKRVSEFNKGHPAYISSNADVVERYVVVHVGQIILQQFS  
EFPDESIRKCAFVLGLSRKMEERHHTKWLIKKKKVLQRNEQNLNPRASMAPSVKRKAMQ  
A

TTTRLINRIWGEYYSNYSPEESKEVVGCQVKDDDEAEDQEENDEDDTTDENLDVPEKNT  
CSTRRIHKSSSDSKEINWDGESIGKTSGGELLFRKARVHGNEIAVGDSVLVEVDEPDELP  
SIYFVEYMFELKDGSKMLHGRMMQRGSETVLGNAANEREVFLINECVDLQLKDVKETV  
VV

NIRMLPWGHQHRKANADADKLDRARAEDRKRKELPTEFYCKSFYQPERGAFFRLSFDK  
MG

LGNGLCYSCSELQQTREKETFKLDISSSSFVYLGTEYSVDDFVYVSPDYFATERGGSETY  
KAGRNVGLMAYVVCQLLGIVGSKGHKQAKVDSTDVKVRRFFRPEDISSDKAYSSDIREIY  
YSEEIHTVPLETIKKGCEVRKKYDIPSEDVPAIFDHVFFCEYMYDPSNGSLKQLPAQVKL  
RYSEIKLDDAASRKRKGKGKEGEDELRVGEQNRASQQKQLATLDIFAGCGGLSEGLQHSG  
ITDTKWAIEYEYPAGDAFRLNHPKAKVFIHNCNVILRAVMQKSGDADDCISTPEASDLAA  
KMDENELNSLPLPGQVDFINGGPPCQGFSGMNRFNQSTWSKVQCEMILAFSLFADYYRPK  
FFLLENVRNFVSFNQKQTFRLTVASLLEMGYQVRFGILEAGAFGVPQSRKRAFIWAASPE  
EVLPEWPEPMHVFAPPELKISLSGTSHYAAVRSTASGAPFRSLTVRDTIGDLPVGNAS  
KTCIEYQGDVPVSWFQKKIRGNSIALSDHISKEMNELNLIRCQRIPKRPGSDWRDLPEEKV  
KLSNGQLVDLIPWCLPNTAKRHNQWKGLFGRLDWDGNFPTSITDPQPMGKVGMCFHPD  
QD

RIVTVRECARSQGFPSYQFSGNILHKHRQIGNAVPPPLAYALGRKLKEAVESKRST

>PhCMT2

MATTEENKNNSKKSPESALAPSFRNEEPVPLEVFYPDDRTPHRRRSSTFTTNIFTS  
DILPKFTIPKQLLPALSQNGKIVNSGKSEGDFSGKRKLTPCLDDEMCIQKSPRSNHIPN  
EFDGSASVSRGKSGMMRGLAALMTTPDVNNKSASSAPASKGGGSSNGAGPELLALPG  
P

EESASVIRSASKRGTTRELLALLTSESNNSSASSTRASKGSNSRGSPILDEILGESNLS  
GEKSLRSRKININNNNNNSNNSIKKINGSNIKRKNNNNNSSEEINSSNERKQKKSSNVCFI

GEPIAEEAQEKWQWRYDLKALAKHGIICMEDLVHEIMTVGSHFKEANNFLWPFQLKVT  
GWTQEEEEESLRGRHDGEEDEIILNVECHYAQAKVAGFIFSIGDCAYVKGEGRKKHIGRIL  
EFFKTTEGEDYFRVLKGAASFHDPKRLFYSVLENDNLLDCIVSKVNVVELPTRHGMNTKD  
IPPAHFYYDMEYCVDYSTFRTLHNVKSSVFP SLVDTSYKPVT TYPLEVLPSC EPMKVELS  
LLDLYAGCGGMSTGLSLGTKLSGLKLVTKWAVDFNGSACDSLKL NHPQTHVRNEAVEDF  
L

ELLKRWEKLIQSYGCSDFKTSSNCELDDIEEGESNDNSQAGSKGSSGEYEGDVGVICGGP  
PCQGISGYNRHRNVDDPLADEKNRQIIIFMDVVEFLRPKYVLMENVADILRFDKASLG  
RYSALSRVHMRYQARLGTMAAGCYGLPQFRLRVFFWGALPSE RNTVAYEEGQARGDLEEAL  
V

LRDAISDLPAVTWHEVREEMPYEMPPSEFQKYIRLPKHEIMGCSSTGVTKTEVPVLFDH  
RPCQLPEDDYLRVCLVPRRKGANFRDLPGVIVGQDNVARRDTEEPKHL PNGKPMVPDCA  
F

NFEHGKSKRPFARLWWDET VATLVTFPNHRAQAILHPEQDRVLTIREYARLQGFDFYKF  
SGTLKERYCQVGNAVAVPVGRALGYALGLAFQRLTGNEPLIKLP NNF SFLKPPIDDIVL  
QN

>PhCMT3

MTRKRASLESNPES SATRKSKRLAVVPKPDPVPADSDFESEPDSSKNTKSIRRSYNKK  
LKQQA AVKVESV VASSVNTDFVSESDSTIKAE EKVDFAVADSDFVDEE DELELGNLKKNL  
SASPSKRKPMR SERANDEEYLF IGEPVPGDEAQQKWP NRYVTKNKGKANFTKNLNAQDD  
S

DQCIQAKCHFTQAKVDGQIYNLGDDAHVQVVEFFEAVDGLQYFTAQW FYRAKDTVIKC  
HD

KYIDKKRVFLSEIKDDNPIDCLVTKLKIVPAT SQFKENIKSNCDYYYDMTYLLPYSSFMS  
LPPDATSPVSSESTISSDIEAAEVKEHKVEKKLLDLYSGCGAMSTGLCLGANSNGVNLVT  
KWAVDLSPFACNSLKL NHPETQVRNEFADDFLELLKHVWQLCVSCSLVKNGVAPHPDLEI  
KDEVEEDEDDESED SGDDKGEVFEVEELLEVCYGD PKEVKKPGVHF KVRWKGYGPEE  
DT

WEPIKGLSGCPKKIKEFVT KGFNSNILPLPGDVDVICGGPPCQGISGFNRFRNKDNPLDD  
PKNKQLDVFMDIVDFLKP K FVLMENVVDLIKFSNGYLGRYALGRLLGMNYQARMGMM  
AAG

AYGLPQFRMRVFVWGALPSEKLPQYPLPTHKVIKRGVIPVEFESHTVAYDEGLELDLKEA  
LFLGDALSDLPSVENDER RDEMPYTDEPKTDFQH FIRLGRDGT LGSVLYDHRPLQLNEDD  
YQRV CQIPKRKGANFRDLPGVRVKTDNKVEWDPDVERVKLP SGKPLVPDYAMTFVGGTS  
S

KPFSRLWWDET VPTVVTRAEPHNQTILHPLQDRVLTIRENARLQGF PDYYKLTGPIKERY  
IQVGNAVAVPVARALGYSLAMS IGLSEEKPLYSLPKNFPSHVELTYNEVSQ

>PhCMT1

MPRKRKASTNSNCASASTTRKSKRHAKEKPDPVAVAESAEC EFIEDEETVSNNEAFVEKR  
VKRVTQVKDNEECKFSGDPLPDTEAHQRWPHRYIYKDKVRESSAPTSLNGQDDPDQLIQA  
KCHYTQALVDNQFYNLGDDAYVQAAENEDDYICKIVEFFQAVDGM L YFTAQW FYRAKD  
TV

IKTHDQFIDKKRVFFSEIKDDNLLDCLVKKIKIVPVPSNTGLQLKESLISDS DYYYDMMY  
LLPYSSFVGLPADVSSPIESGSTISSDGEDVEVKEKKLLDLYSGCGAMSTGLCLGADIF

NVRNESAEDFLLLLQEWEQLCVSCSLLKSNVPPHPSLNMNEDEEDNDDDTGDEDEGSG  
H  
DEDGVFEVEELLQICYGDPKEIKKPGLYFKVRWKGYGPDDDTWEPVDGLDGC GSKIKDF  
V  
TRGFKANMLPLPGEVDVICGGPPCQGSGFNFRNKANPLQDPKNKQLEVFMNIVKFLRP  
RFVLMENVVDLVRFSNGFLGRYALGRLVGMNYQARMGMMIAGAYGLPQFRMRVFMWG  
ALP  
SEKLPQYPLPTHNVVSRGGIPTEFELNAVHDESLKAKLKRELFLKDALSDDLPPVWTLGTV  
LYDHRPLQLNEDDYERV CQIPKRKGANFRVLPGV RVGANNVVEWDPDVERVKLASGKPL  
V  
PDYAMKFVRGTSPKPFGRLLWWDEIVATVVTRAEPHNQVILHPEQDRVLTIRENARLQGF  
DYYKLIGPIKERYIQVGNVAVPVARALGYSLALALKGLSGGNPLMSLPPNFPCLDELGS  
NEVSED

>PhDNMT2

MESESCRNPWRVLEFYSGIGGMRYSLKAAVNATVIEAFDINDVANDVYQHNFGHRPFQ  
GNIQTLNAADIDGYNADAWLLSPPCQPYTRQGLQKGSNDARASSFLKILELIPQLLRPPS  
YLFVENVVGFETSDTHDILVEILEKNNFVTQEFILSPLQFGLPYSRPRYYCLAKRKPLSF  
EVPEFNNQLLRTPGPLLQTESTMEKQQQSSEYWDELLQACKPIDDFLVFKPFGNEVDS  
STYSFHVNDSAKSDRTDVDNNMYCVPSSLVERWGSAMDIVYPH SKRCCCFTKSYRYVK  
G  
TGSLLATVQEKSEGRTPSLQDLCLRYFTPREWDYTG YCCCCCIKSRHLMILIVGCKFAFF  
SRRLPVSTAHQSSPTGTGFPPTFFPPPSHRYNTLT

>PhDRM4

MQDKNLSGEENDNIDWDTEDELEIQEIQDTPFSACMNLRTTGQHAVNGDGEASSSSVPSQ  
SKFIQQFVVMGFPEKSIKAIQQNGENSDLVLDALLTFKALEDSPVEQLSVSPQQESCIS  
SDDSSSEYENFLDDVDEEDSWSSSDSGCISSQRCYLKGDGSSLSQKERTLFSLANMGYLD  
EEASIAMERCGPEASLAELTDFISAAQMARAE DPYLPEDIKPKMKHISSGYKKRKMYNEL  
CKRKTGMTGFDEETVRLPKHMIGFGVPMESPISLQRTLPEQAIGPPFFYYENIALAPKG  
VWDTISRSLYDIQPEFVDSKYFCAAARKRGYIHNLP IENRFPLLPLAPQTIHEVLPLTKK  
WWPSWDTRTKLNCLQTSIASAQLTDRIRKVLEDPRLDGEQVQKCVLDKCRQWNLVWVG  
RN  
KVAPLEPDEVEMLLGF PKNHTRGISRTDRYKSLGNSFQVDTVAYHLSVLKDLFPKGINVL  
SLFSGIGGAEVALHRLGIRLKNVVSVEKYE VNRNIVRSWWEQTNQMGNLIEFDDVQQLN  
G

DRLEQLIESCGGFDLVIGGSPCNNLSGGNRVSRDGLEGTESILFFHFPRILDLVKSIMSS  
HG

>PhDRM1

DKNLSEESDSIDWDTESEPEVQEIQDTAFSTCMNLRTTGHHAFSGDAEASSSSGSCWSK  
FIQQFQEMGF PKESIAKAI EQNGDNFDLVLNALLTFKALEETPDEQPSASPQLESCLSSD  
DSSEYYENFLDDVYEEDSWSSSDSDDCKLSEKEQKLLSLRNMGYSEEDASIAIERCGPEA  
LLGILIDFISAAEWAREEDRYLPEDIKPKVKHIPGGHKKRRMYNELCKRKKQRAIAKEET  
IRLPKPMIRFRVPMESPLVVQRALPEQAIVFLRC KEKGYIHNLPVRNRFPLLPLPLTIH  
EALPSTKKYWPSWDTRRLNCLQTSIGSAKL TNRIRKVLEDPRFDGEPPKEVQIGVLEKC  
RQWNLVWIGRNKLAPLEPDEYELLGYPKNHTRGISRTDRYKSLGNSFQVDTVAYHLSVL

KDLFPEGINVL SLFSGIGGAEVALHRLEIRLKNVVSVEISEVNRDVVRSWWEQTNQGRNL  
IHIKDVEELNGDSLEQLIESYGGFDLVIGGSPCNNLAGSNRVSREGLVGTESILFFHYPR  
ILALVKTIMSRHR

>PhDRM2

MDNNLSGEENEDIDWDTEDELEIQEIQDITVPSCMNLRTTVPVAVSSDWEASSSSVPFQSK  
FIQQFIVMGFPEESIAKAIEQNGENSELVLDITLLTFKALEDSPEEQPSASPQLEPCISSD  
DSSSEYYENLLDDVYEEDSWSSSDHLINSATQCYLRDDSNLSPKDQTLTSLVNMGYPR  
EEASIAMERCPGASLPELADFMYAAQMARAEOPYLPEDIKPKLNHISGGYKKRKMYSLEL  
KRRKKRAIFDEETIRLPKPMIGFGVPTESFPAVVQRTLPEQAKGPPFFYYENVALAPKGVW  
DTISRNLYGIEPEFVDSKYFCAAARKRGYIHNLPIENRFLLPLPPRTINEALPLTKKWW  
PSWDSRTKLNCLQTAYGSARLTDRIRKAVEDFDGEPPERVQKYVLEQCRKWNLVWVGRN  
K

VAPLEPDEVEMLLGFKNHTRGGGISRTDRYKSLGNSFQVDTVAYHLSVLKDLFPNGINV  
LSLFSGIGGAEVALYRLGIRLNNVVSVEKSEVNRNIVRSWWEQTNQGRNLIDFDDVQQLN  
GDRLEQLIDSFGGFDLIIGGSPCNNLAGSNRVS RDGLEQGESSLFYHYPRILELVKDIMA  
RYRM

>PhDRM3

DNIASSSGSNVRSSLLSMGFKAPLVDKAIKENGEDNIDLLLETFLFANSDLHRAESSDSL  
SLFSDDDEDTKGPAKCDGDVHIKEPDPCVGRDEKRASLLAMSFSLEVEFAIGKLGEAA  
PINELVDVIFAARIAANYKKDDDDDCVEIKDMKKECSTEALFGTMEKTLKLEMGFSENE  
VSAVIDKYGSEVPLEELANLIVDPNSSRRRDKHLKSLMNSIGFNPLAVKKEEPCLDT  
FESKDLNLLKFKGKRPM SLADYIDERGT SKRPKPEYDEGFSSSLGPAWQEIINSNLRPS  
NTTRTPVSRRTHQRTRVLDCQGTQKLSMPNSCRSLDQMVAKAPYFFYGNVMNLSQDSW  
VK

ISQFLYAIEPEFVNSQHFSALS RKEGYLHNLPTENRFHIVPKSPMTIQEAVPNSGKWWPS  
WDRKHLSCINSEISVISQLCERLERSMSESQGFPVSKQRDILHQCQLFNLA WVGRYKL  
APVGPEQIERILGYPENHTRLAGFSLMERLLCLKHCFQIDTLAYHLSALKSLYPGGTLV  
SIFSGIGGAEIALHRLGIRLKAVVSIEASEKNRTILKRWWGSSGQTGELVQMEDVSKMAG  
SKIEVLLKIYGGFDIICQSPCTYSSKGNLAADNNSPASLDFMLFHEFVRVLQVRVSTVG  
RN

>AtDnmt2

MAEQELQRINEKKPWQVLEFYSGIGGMRYSLMASGIVSEVVEAFEINDSANDVYQHNFK  
HRPYQGNIQSLTAADLDKYNADAWLLSPPCQPYTRQGLQKHSGDARAFSFLRILELIPHTT  
KPPQMLFVENVVG FETSDTHMEMIGTLTKLDYVTQEFILSPLQFGVPYSRPRYFCLAKRKP  
LPFKSQHSNNKLLWSPDPLYGRDDQVEFGKCAEEGLDKLLEFCKPVEKFLELAAHVDG  
EPSSVDDSENGSKDCCGQEGDSVPDSVHQYLVPSLIERWGNAMDIVYPDSKRCCCFTKS  
YYRYVKGTGSLLATVQPKIKGESCLKEQRLRYFTPREVANFHSFPEDFEFPKHISLRQRYA  
MLGNSLSVAVVAPLLRYLFDS

>CcDnmt2\_like1

MEEEGGLPAKQPWRVLEFYSGIGGMRYSVMKAGLQTEMVEAFDINDLANDVYEHNFH  
RPFQGNITLTAADLDRYCANVWLLSPPCQPYTRQGLQKQSADARASSFLRILEIIPQLML  
PPVMLFVENVVG FETSDTHQKMVQILEESQFEMQEFILSPLQFGVPYSRPRYFCLAKRKPS  
SFCNPEFNRQLLHVPELLVGCNESISISENGQLTSTSDKMLQTCLPIERFLEFGNSMNQVEN  
GTSFPPDTCSDDESLKQYFVPSNLIERWGSAMGILDIKFGIDIVYPDSKRCCCFTKSYRYV

KGTGSLTTVMKTRDKTSLEELCLRYFTPREVSNLHSFPKEFEFPEHVTLRQRYALPEKCT  
EFGVRIVSHMYEIINTHGI

>CcDnmt2\_like2

MEEGLPAKQPWRVLEFYSGIGGMRYSVMKAGLQTEMVEAFDINDLANDVYEHNFGR  
PFQGNITLTAADLDYRANVWLLSPPCQPYTRQGLQKQSADARASSFLRILEIIPQLMLPP  
VMLFVENVVGFEFSDTHQKMVQILEESQFEMQEFILSPLQFGVPYSRPRYFCLAKRKPSSF  
CNPEFNGQLLHVPELLFGCNESISISENGQLTSTSDKMXQTCLPIERFLEFGNSMNQVENGT  
SFPNTFSDENSLKQYFVPSNLIERWGSAMGILDIKLFISSILIQSAAVASQRPKTRDKTSLEE  
LCLRYFTPREVSNLHSFPKEFEFPEHVTLRQRYALLGNSLSAAVVAPLLHYLFSEP

>SlDnmt2

MESEVSRSPWRVLEFYSGIGGLRYSLLKAAVDATVVEAFDINDVANDVYQHNFGHRPFQG  
NIQTLNAADLDGYNADAWLLSPPCQPYTRQGLQKGSSDARASSFLKILELVPQLLRPPSYL  
FVENVVGFEFSDTHAILVDILEKNNFVTQEFILSPLQFGLPYSRPRYYCLAKRKPLSFVPEF  
NNQLLRTPGPLLQGTESTMEKEQLLSPEYWDELLQACHPVDDFLVFKTFGNRKDSSTYSF  
HANDSVKSDRLDEENDVCFVPSSLIERWGSAMDIVYPHRSKCCCFTKSYYRYVKGTGSL  
ATAEATFQEKPENRMPSLQDLSLRYFTPREVANLHSFPEDFQFPQHISLRQRYAMLGNSLSV  
GVVAPLLQYLFINHS\*
