# Supplementary material for: Exploration of the Potential Transcriptional Regulatory Mechanisms of DNA Methyltransferases and MBD Genes in Petunia Anther Development and Multi-Stress Responses
Source: Genes (Basel). 2022 Feb 8;13(2):314. doi: 10.3390/genes13020314 (PMC8872020; doi:10.3390/genes13020314)
Supplement: Supplementary file 1 [file genes-13-00314-s001.zip › Table S4.xlsx]

## Sheet: Sheet1
Table S4. The RPKM data of PhC5-MTase and PhMBD genes.
Gene name	ID	root-1	root-2	root-3	stem-1	stem-2	stem-3	leaf-1	leaf-2	leaf-3	an1-1	an1-2	an1-3	an2-1	an2-2	an2-3	an3-1	an3-2	an3-3	an4-1	an4-2	an4-3	an5-1	an5-2	an5-3	ope-1	ope-2	ope-3	pe2-1	pe2-2	pe2-3	pe4-1	pe4-2	pe4-3	pi2-1	pi2-2	pi2-3	sep2-1	sep2-2	sep2-3	Description	KEGG Pathway	GO Component	GO Function	GO Process
PhMBD7	Peaxi162Scf00411g00117.1	20.95	11.9	19.55	0	4.23	8.82	0.27	0.46	0.48	1.74	2.05	2.33	3.78	3.69	2.24	6.59	4.92	5.18	1.41	1.59	1.35	0	0	0	0.11	0	0.09	2.94	3.86	3.1	6.85	8.53	3.49	1.2	1.5	1.29	3.31	4.47	1.81	methyl-CPG-binding domain 7	-	GO:0005634//nucleus;GO:0005622//intracellular;GO:0043227//membrane-bounded organelle;GO:0043229//intracellular organelle;GO:0043226//organelle;GO:0044464//cell part;GO:0005623//cell;GO:0043231//intracellular membrane-bounded organelle;GO:0044424//intracellular part	GO:0005488//binding;GO:1901363//heterocyclic compound binding;GO:0097159//organic cyclic compound binding;GO:0003676//nucleic acid binding;GO:0003677//DNA binding	-
PhMBD5	Peaxi162Scf00224g00513.1	16.23	14.48	13.56	11.26	10.55	10.69	6.2	8.36	6.8	32.26	28.49	36.61	24.67	24.79	23.2	22.57	19.66	22.38	16.73	23.62	21.78	23.34	23.19	22.37	10.34	8.91	10.28	22.09	21.12	17.12	23.04	20.28	21.17	26.88	24.41	26.45	12.3	18.86	15.54	Methyl-CpG-binding domain-containing protein 6 [Morus notabilis]	-	GO:0044424//intracellular part;GO:0043226//organelle;GO:0044464//cell part;GO:0005634//nucleus;GO:0043227//membrane-bounded organelle;GO:0005622//intracellular;GO:0043229//intracellular organelle;GO:0005623//cell;GO:0043231//intracellular membrane-bounded organelle	GO:0003676//nucleic acid binding;GO:0005488//binding;GO:0003677//DNA binding;GO:1901363//heterocyclic compound binding;GO:0097159//organic cyclic compound binding	-
PhMBD11	Peaxi162Scf00392g00416.1	8.82	6.76	7.31	5.59	5.47	4.52	3.19	3.44	2.93	19.56	20.22	21.32	11.36	19.41	18.85	15.06	15.33	17.97	10.09	14.32	13.38	6.02	7.42	7.84	3.89	4.17	3.38	16.22	17.84	14.25	16.16	14.89	14.78	17.57	17.72	16.2	6.02	8.87	6.81	methyl-CPG-binding domain 8	-	GO:0043229//intracellular organelle;GO:0043227//membrane-bounded organelle;GO:0005623//cell;GO:0044464//cell part;GO:0043226//organelle;GO:0005634//nucleus;GO:0043231//intracellular membrane-bounded organelle;GO:0044424//intracellular part;GO:0005622//intracellular	GO:0043167//ion binding;GO:0003676//nucleic acid binding;GO:1901363//heterocyclic compound binding;GO:0097159//organic cyclic compound binding;GO:0003677//DNA binding;GO:0043169//cation binding;GO:0005488//binding;GO:0046872//metal ion binding	-
PhMBD1	Peaxi162Scf01039g00228.1	9.61	14.51	13.19	24.98	27	20.93	11.77	15.76	14.02	43.22	43.79	46.46	36	28.01	30.38	37.26	32.67	31.33	19.26	17.73	18.9	1.94	3.94	2.75	16.3	17.64	16.09	35.56	36.39	41.86	27.57	28.4	31.12	55.82	55.3	55.95	23.58	22.82	23.94	methyl-CPG-binding domain 4	-	GO:0005634//nucleus;GO:0005623//cell;GO:0043226//organelle;GO:0005622//intracellular;GO:0043231//intracellular membrane-bounded organelle;GO:0043227//membrane-bounded organelle;GO:0044424//intracellular part;GO:0044464//cell part;GO:0043229//intracellular organelle	GO:0043169//cation binding;GO:0097159//organic cyclic compound binding;GO:0003676//nucleic acid binding;GO:0005488//binding;GO:0043167//ion binding;GO:0003677//DNA binding;GO:0046872//metal ion binding;GO:1901363//heterocyclic compound binding;GO:0008270//zinc ion binding;GO:0046914//transition metal ion binding	-
PhMBD10	Peaxi162Scf00313g00818.1	38.08	42.09	37.04	43.8	48.46	38.03	32.04	34.4	29.41	156.41	160.9	145.8	89.87	96.68	86.41	70.67	75.33	75.3	57.59	49.94	52.58	11.87	11.54	11.03	112.63	98.48	104.1	149	168.28	155.12	119.68	117.11	125.29	214.91	226.23	222.69	46.11	52.89	57.9	methyl-CPG-binding domain 10	-	GO:0043227//membrane-bounded organelle;GO:0005634//nucleus;GO:0044464//cell part;GO:0044424//intracellular part;GO:0043231//intracellular membrane-bounded organelle;GO:0005622//intracellular;GO:0005623//cell;GO:0043226//organelle;GO:0043229//intracellular organelle	GO:1901363//heterocyclic compound binding;GO:0003676//nucleic acid binding;GO:0005488//binding;GO:0003677//DNA binding;GO:0097159//organic cyclic compound binding	-
PhMBD6	Peaxi162Scf00954g00319.1	3.78	5.83	4.78	10.91	10.43	9.04	7.4	9	6.85	15.02	12.96	16.32	11.01	8.16	7.26	12.35	12.17	10.8	9.33	7.92	11.06	7.83	6.8	7.08	7.08	7.35	7.08	13.78	16.41	14.86	10.91	9.35	8.11	16.85	22.04	21.15	5.69	6.43	7.9	methyl-CPG-binding domain protein 02	-	GO:0005622//intracellular;GO:0044424//intracellular part;GO:0005623//cell;GO:0043231//intracellular membrane-bounded organelle;GO:0043227//membrane-bounded organelle;GO:0043226//organelle;GO:0005634//nucleus;GO:0043229//intracellular organelle;GO:0044464//cell part	GO:0008270//zinc ion binding;GO:0046872//metal ion binding;GO:0003676//nucleic acid binding;GO:0043167//ion binding;GO:0003677//DNA binding;GO:0097159//organic cyclic compound binding;GO:0043169//cation binding;GO:0046914//transition metal ion binding;GO:1901363//heterocyclic compound binding;GO:0005488//binding	-
PhMBD2	Peaxi162Scf00320g00413.1	21.93	28.4	24.75	28.8	31.61	34.69	23.16	21.29	19.43	51.31	44.45	47.49	48.84	46.54	43.81	58.16	57.98	56.62	54.35	45.44	43.93	17.55	19.04	15.64	25.64	30.44	24.97	41.74	39.62	38.02	43.2	39.32	52.78	63.73	60.67	67.75	23.33	24.26	25.85	methyl-CPG-binding domain protein 02	-	GO:0005634//nucleus;GO:0005623//cell;GO:0043226//organelle;GO:0005622//intracellular;GO:0044464//cell part;GO:0043231//intracellular membrane-bounded organelle;GO:0044424//intracellular part;GO:0043227//membrane-bounded organelle;GO:0043229//intracellular organelle	GO:0003676//nucleic acid binding;GO:1901363//heterocyclic compound binding;GO:0003677//DNA binding;GO:0097159//organic cyclic compound binding;GO:0008270//zinc ion binding;GO:0046914//transition metal ion binding;GO:0005488//binding;GO:0046872//metal ion binding;GO:0043167//ion binding;GO:0043169//cation binding	-
PhMBD3	Peaxi162Scf00915g00037.1	40.39	34.51	35.21	24.31	29.37	24.62	16.82	20.49	15.76	26.21	25.54	27.51	26.94	24.91	25.33	27.4	23.37	30.74	24.37	24.31	21.97	3.42	3.19	3.48	14.77	10.8	10.36	55.65	45.93	51.32	49.38	45.41	50.87	66.08	58.78	58.55	22	24.74	27.26	Methyl-CPG-binding domain protein 13, putative isoform 1 [Theobroma cacao] gb|EOY23159.1| Methyl-CPG-binding domain protein 13, putative isoform 1 [Theobroma cacao]	-	GO:0043229//intracellular organelle;GO:0043227//membrane-bounded organelle;GO:0044424//intracellular part;GO:0005622//intracellular;GO:0043231//intracellular membrane-bounded organelle;GO:0044464//cell part;GO:0005623//cell;GO:0005634//nucleus;GO:0043226//organelle	GO:0003676//nucleic acid binding;GO:1901363//heterocyclic compound binding;GO:0097159//organic cyclic compound binding;GO:0005488//binding;GO:0003677//DNA binding	-
PhMBD9	Peaxi162Scf00332g00710.1	42.4	22.89	25.53	45.96	31.61	40.4	39.82	42.31	38.49	40.24	37.01	56.82	34.39	28.63	27.9	29.53	35.48	40.63	40.5	60.53	48.45	0.75	1.29	0.93	18.24	17.07	15.72	226.32	204.21	180.18	284.88	178.27	323.06	257.11	259.01	244.35	108.7	213.34	258.85	methyl-CPG-binding domain 10	-	GO:0043231//intracellular membrane-bounded organelle;GO:0044464//cell part;GO:0043227//membrane-bounded organelle;GO:0005634//nucleus;GO:0005622//intracellular;GO:0005623//cell;GO:0043226//organelle;GO:0043229//intracellular organelle;GO:0044424//intracellular part	GO:0097159//organic cyclic compound binding;GO:1901363//heterocyclic compound binding;GO:0003677//DNA binding;GO:0003676//nucleic acid binding;GO:0005488//binding	-
PhMBD8	Peaxi162Scf00207g00645.1	0.71	1.15	0.97	2.32	1.13	1.08	0.94	1.06	2.16	1.15	1.18	0.92	1.49	0.79	0.99	2.01	2.11	2.75	2.85	3.28	2.43	0.27	0.25	0.15	3.61	3.69	1.9	5.75	5.13	4.21	4.39	3.31	5.46	5.13	3.71	3.7	1.38	2.05	2.1	methyl-CPG-binding domain 10	-	GO:0043229//intracellular organelle;GO:0005622//intracellular;GO:0005634//nucleus;GO:0005623//cell;GO:0043231//intracellular membrane-bounded organelle;GO:0044464//cell part;GO:0043227//membrane-bounded organelle;GO:0043226//organelle;GO:0044424//intracellular part	GO:0003676//nucleic acid binding;GO:0005488//binding;GO:0097159//organic cyclic compound binding;GO:1901363//heterocyclic compound binding;GO:0003677//DNA binding	-
PhMBD4	Peaxi162Scf00714g00124.1	32.25	30.92	33.94	17.89	16.78	15.83	10.07	11.98	10.28	20.45	23.17	17.95	18.58	22.33	25.59	22.14	22.5	26.73	16.78	22.65	21.95	5.55	8.81	8.06	21.56	23.54	20.79	29.74	30.91	31.66	34	32.87	33.11	30.36	33.34	33.39	17.67	26.59	23.08	Unknown protein	-	GO:0043229//intracellular organelle;GO:0043227//membrane-bounded organelle;GO:0005634//nucleus;GO:0043226//organelle;GO:0044424//intracellular part;GO:0005622//intracellular;GO:0005623//cell;GO:0043231//intracellular membrane-bounded organelle;GO:0044464//cell part	GO:0005488//binding;GO:0097159//organic cyclic compound binding;GO:1901363//heterocyclic compound binding;GO:0003677//DNA binding;GO:0003676//nucleic acid binding	-
PhCMT3	Peaxi162Scf00062g00201.1	9.93	22.83	25.61	31.75	72.03	16.59	31.39	27.92	43.96	176.4	181.35	147.6	53.55	54.67	54.72	24.75	25.67	24.97	6.8	5.57	7.4	2.02	1.81	2.32	0.79	0.36	0.21	203.24	229.83	205.84	93.48	91.27	90.65	235.14	240.82	248.13	24.61	24.37	34.71	DNA (cytosine-5)-methyltransferase 3	ko00270//Cysteine and methionine metabolism	-	GO:1901363//heterocyclic compound binding;GO:0097159//organic cyclic compound binding;GO:0005488//binding;GO:0003676//nucleic acid binding;GO:0016740//transferase activity;GO:0003677//DNA binding;GO:0008168//methyltransferase activity;GO:0003824//catalytic activity;GO:0016741//transferase activity, transferring one-carbon groups	GO:0090304//nucleic acid metabolic process;GO:1901360//organic cyclic compound metabolic process;GO:0006304//DNA modification;GO:0009987//cellular process;GO:0006139//nucleobase-containing compound metabolic process;GO:0008152//metabolic process;GO:0071704//organic substance metabolic process;GO:0043412//macromolecule modification;GO:0032259//methylation;GO:0044237//cellular metabolic process;GO:…
PhDNMT2	Peaxi162Scf00341g00624.1	2.33	2.72	2.35	4.67	5.14	3.72	3.26	2.81	3.18	8.83	8.78	8.26	4.38	5.55	3.06	5.34	6.8	4.73	4.43	4.23	4.73	2.92	4.36	3.76	3.44	5.22	3.51	3.69	4.38	4.91	2.8	3.32	2.04	6.03	4.69	5.83	2.72	2.25	3.6	tRNA (cytosine(38)-C(5))-methyltransferase	-	-	GO:0003824//catalytic activity;GO:1901363//heterocyclic compound binding;GO:0005488//binding;GO:0003677//DNA binding;GO:0016741//transferase activity, transferring one-carbon groups;GO:0097159//organic cyclic compound binding;GO:0016740//transferase activity;GO:0003676//nucleic acid binding;GO:0008168//methyltransferase activity	GO:0044260//cellular macromolecule metabolic process;GO:0008152//metabolic process;GO:0006725//cellular aromatic compound metabolic process;GO:0044728//DNA methylation or demethylation;GO:0043170//macromolecule metabolic process;GO:0034641//cellular nitrogen compound metabolic process;GO:0006259//DNA metabolic process;GO:0090304//nucleic acid metabolic process;GO:0006306//DNA methylation;GO:00322…
PhMET1	Peaxi162Scf01053g00039.1	5.2	8.1	7.65	12.72	16.35	7.79	8.59	7.72	9.29	58.27	55.05	60.96	11.03	16.37	13.58	12.11	11.15	10.68	3.25	2.56	3.64	0.44	0.46	0.38	3.12	4.8	2.9	29.29	43.33	41.69	15.23	16.07	14.12	46.36	54.23	57.48	5.3	4.48	5.71	DNA (cytosine-5-)-methyltransferase family protein	ko00270//Cysteine and methionine metabolism	GO:0005634//nucleus;GO:0043229//intracellular organelle;GO:0005622//intracellular;GO:0005623//cell;GO:0044464//cell part;GO:0043227//membrane-bounded organelle;GO:0043226//organelle;GO:0043231//intracellular membrane-bounded organelle;GO:0044424//intracellular part	GO:0008757//S-adenosylmethionine-dependent methyltransferase activity;GO:0003676//nucleic acid binding;GO:0005488//binding;GO:0009008//DNA-methyltransferase activity;GO:1901363//heterocyclic compound binding;GO:0097159//organic cyclic compound binding;GO:0008168//methyltransferase activity;GO:0003886//DNA (cytosine-5-)-methyltransferase activity;GO:0003677//DNA binding;GO:0016740//transferase act…	GO:0043414//macromolecule methylation;GO:0032259//methylation;GO:0006306//DNA methylation;GO:0006725//cellular aromatic compound metabolic process;GO:0006139//nucleobase-containing compound metabolic process;GO:0044237//cellular metabolic process;GO:0044260//cellular macromolecule metabolic process;GO:0090116//C-5 methylation of cytosine;GO:0032776//DNA methylation on cytosine;GO:0043170//macromo…
PhDRM2	Peaxi162Scf00326g00710.1	18.1	19.8	24.02	27.45	29.06	25.18	30.21	31.11	28.64	55.12	52.34	52.96	41.82	46.64	39.33	51.83	46.31	51.68	42.6	40.8	40.07	14.48	16.4	16.05	18.2	15.16	16.24	41.12	46.56	41.76	28.1	25.14	26.66	61.25	60.12	60.88	23.91	18.99	23.33	DNA (cytosine-5)-methyltransferase DRM1	-	-	GO:1901363//heterocyclic compound binding;GO:0016740//transferase activity;GO:0008168//methyltransferase activity;GO:0016741//transferase activity, transferring one-carbon groups;GO:0005488//binding;GO:0003824//catalytic activity;GO:0003676//nucleic acid binding;GO:0003677//DNA binding;GO:0097159//organic cyclic compound binding	GO:0006139//nucleobase-containing compound metabolic process;GO:0046483//heterocycle metabolic process;GO:0006259//DNA metabolic process;GO:1901360//organic cyclic compound metabolic process;GO:0044238//primary metabolic process;GO:0006807//nitrogen compound metabolic process;GO:0043170//macromolecule metabolic process;GO:0006304//DNA modification;GO:0044728//DNA methylation or demethylation;GO:0…
PhDRM3	Peaxi162Scf00164g00518.1	9.02	9.02	7.9	8.74	10.71	9.03	7.62	6.57	7.11	22.22	20.76	18.59	15.62	15.74	16.64	16.1	16.15	16.45	9.95	9.8	9.12	3.82	4.37	3.99	6.81	7.56	7.56	28.34	26.73	29.66	15.84	18.52	17.52	30.51	31.76	27.94	9.44	9.47	8.55	DNA (cytosine-5)-methyltransferase DRM1	-	-	GO:0003677//DNA binding;GO:0016741//transferase activity, transferring one-carbon groups;GO:0097159//organic cyclic compound binding;GO:0005488//binding;GO:0003676//nucleic acid binding;GO:0016740//transferase activity;GO:0008168//methyltransferase activity;GO:1901363//heterocyclic compound binding;GO:0003824//catalytic activity	GO:0006807//nitrogen compound metabolic process;GO:0043412//macromolecule modification;GO:0090304//nucleic acid metabolic process;GO:0044237//cellular metabolic process;GO:1901360//organic cyclic compound metabolic process;GO:0006725//cellular aromatic compound metabolic process;GO:0044728//DNA methylation or demethylation;GO:0006306//DNA methylation;GO:0006304//DNA modification;GO:0006305//DNA a…
PhCMT2	Peaxi162Scf00045g00047.1	4.37	6	5.07	14.95	17.54	13.42	7.81	7.94	8.03	22.76	23.15	21.24	17.23	19.91	17.34	12.21	13.33	12.52	8.7	7.67	7.43	0.2	0.27	0.48	3.48	2.62	3.22	22.85	29.54	27.07	16.11	15.99	17.31	22.98	22.56	23.93	11.15	10.18	12.64	DNA (cytosine-5)-methyltransferase 1	ko00270//Cysteine and methionine metabolism	-	GO:0097159//organic cyclic compound binding;GO:0005488//binding;GO:0016741//transferase activity, transferring one-carbon groups;GO:0003677//DNA binding;GO:0003676//nucleic acid binding;GO:0003824//catalytic activity;GO:0008168//methyltransferase activity;GO:1901363//heterocyclic compound binding;GO:0016740//transferase activity	GO:0006725//cellular aromatic compound metabolic process;GO:0006305//DNA alkylation;GO:0009987//cellular process;GO:1901360//organic cyclic compound metabolic process;GO:0044260//cellular macromolecule metabolic process;GO:0006304//DNA modification;GO:0006139//nucleobase-containing compound metabolic process;GO:0044238//primary metabolic process;GO:0043414//macromolecule methylation;GO:0044728//D…
PhDRM1	Peaxi162Scf00089g00638.1	1	1.09	0.59	2.13	0.87	0.96	0.14	0	0.04	7.87	7.88	8.36	4.14	3.71	3.93	4.54	5.45	5.21	1.76	2.07	1.95	1.37	1.64	1.71	0.61	0.58	0.33	1.06	1.41	2.17	0.32	0.48	0.54	4.22	3.45	4.66	0.36	0.27	0.18	DNA (cytosine-5)-methyltransferase DRM1	-	-	GO:0016740//transferase activity;GO:0003677//DNA binding;GO:0097159//organic cyclic compound binding;GO:0008168//methyltransferase activity;GO:1901363//heterocyclic compound binding;GO:0003824//catalytic activity;GO:0016741//transferase activity, transferring one-carbon groups;GO:0005515//protein binding;GO:0005488//binding;GO:0003676//nucleic acid binding	GO:0044728//DNA methylation or demethylation;GO:0032259//methylation;GO:0006305//DNA alkylation;GO:0090304//nucleic acid metabolic process;GO:0043170//macromolecule metabolic process;GO:0044238//primary metabolic process;GO:0006259//DNA metabolic process;GO:0046483//heterocycle metabolic process;GO:0034641//cellular nitrogen compound metabolic process;GO:0071704//organic substance metabolic proce…
PhCMT1	Peaxi162Scf00441g00015.1	19.61	21.58	17.97	8.4	18.97	11.93	3.89	4.63	8.13	40.12	39.37	37.9	22.37	19.42	18.03	30.7	28.5	30.16	13.84	11.64	13.25	2.01	1.75	1.54	0.95	0.56	0.5	69.98	66.85	61.08	42.36	47.37	32.55	62.74	69.24	64.33	16.28	16.85	15.55	DNA (cytosine-5)-methyltransferase 1	ko00270//Cysteine and methionine metabolism	-	GO:0016740//transferase activity;GO:0003677//DNA binding;GO:0097159//organic cyclic compound binding;GO:1901363//heterocyclic compound binding;GO:0005488//binding;GO:0003676//nucleic acid binding;GO:0008168//methyltransferase activity;GO:0016741//transferase activity, transferring one-carbon groups;GO:0003824//catalytic activity	GO:0044237//cellular metabolic process;GO:0006259//DNA metabolic process;GO:0044260//cellular macromolecule metabolic process;GO:0043414//macromolecule methylation;GO:0090304//nucleic acid metabolic process;GO:0032259//methylation;GO:0006306//DNA methylation;GO:0044238//primary metabolic process;GO:0071704//organic substance metabolic process;GO:0008152//metabolic process;GO:0006807//nitrogen com…
PhDRM4	Peaxi162Scf00005g00086.1	0	0	0	0	0	0	0	0	0	0	0	0.03	0.03	0.04	0	0.6	0.59	0.35	0.07	0.19	0.18	2.71	2.71	2.9	0	0	0	0.23	0.08	0.08	0	0	0	0.07	0.07	0.26	0	0	0	DNA (cytosine-5)-methyltransferase DRM1	-	-	GO:0016741//transferase activity, transferring one-carbon groups;GO:1901363//heterocyclic compound binding;GO:0003824//catalytic activity;GO:0003676//nucleic acid binding;GO:0005488//binding;GO:0016740//transferase activity;GO:0008168//methyltransferase activity;GO:0097159//organic cyclic compound binding;GO:0003677//DNA binding	GO:0006306//DNA methylation;GO:0090304//nucleic acid metabolic process;GO:0009987//cellular process;GO:0071704//organic substance metabolic process;GO:0008152//metabolic process;GO:0032259//methylation;GO:1901360//organic cyclic compound metabolic process;GO:0043412//macromolecule modification;GO:0006807//nitrogen compound metabolic process;GO:0044260//cellular macromolecule metabolic process;GO:…
