# Supplementary figures and images for: Exploration of the Potential Transcriptional Regulatory Mechanisms of DNA Methyltransferases and MBD Genes in Petunia Anther Development and Multi-Stress Responses
Source: MDPI journal article supplement (doi:10.3390/genes13020314), 2022-02-08

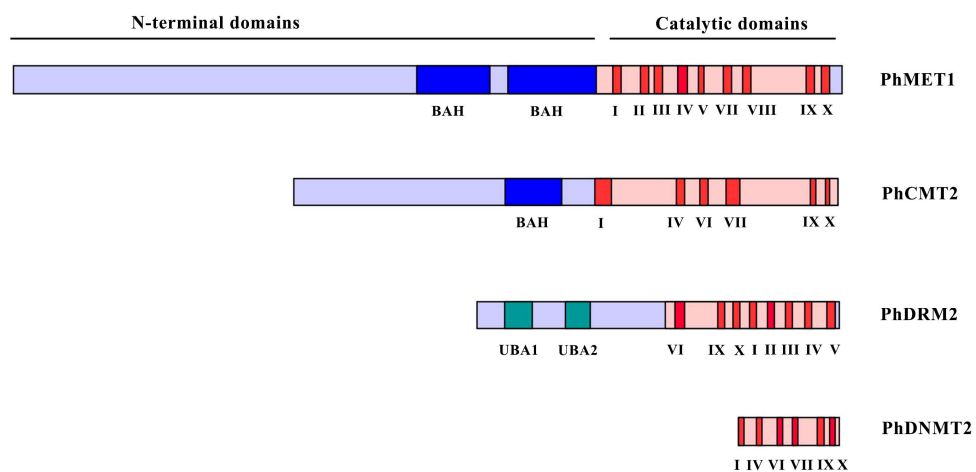

**Figure S1. Schematic structures of *PhC5-MTase* genes.**

Supplement: s1 [file s1]
